# Supplementary material for: Nanomaterials in the Environment: Research Hotspots and Trends
Source: PubMed Central journal article supplement (PMC6950608; doi:10.3390/ijerph16245138), 2019-12-16
Supplement: ijerph-16-05138-s001.pdf [file ijerph-16-05138-s001.pdf]

# Supporting Information

## Nanomaterials in the environment: research hotspots and trends

### Contents

|                                                                                  |    |
|----------------------------------------------------------------------------------|----|
| Note: .....                                                                      | 2  |
| Fig. S1 Countries/territories co-occurrence clustering network by pajek.....     | 2  |
| Fig. S2 institutions co-occurrence clustering network by pajek .....             | 2  |
| Fig. S3 High-impact institutions of density view by VOSviewer.....               | 3  |
| Fig. S4 Web of science categories co-occurrence clustering network by pajek..... | 3  |
| Fig. S5 Hot Web of science categories of density view by VOSviewer.....          | 4  |
| Table.S1 Cluster summary of co-citation analysis by Citespace.....               | 4  |
| Table.S2 Network summary of co-citation analysis by Citespace.....               | 51 |

**Note:**

In results of Pajek, the size of the point is the number of occurrences, and the width of the line is the number of simultaneous occurrences of the two connected points. In the density view, each point is filled the color according to the density of the them. High density is close to red, otherwise, blue. Density depends on the weight of surrounding term and itself.

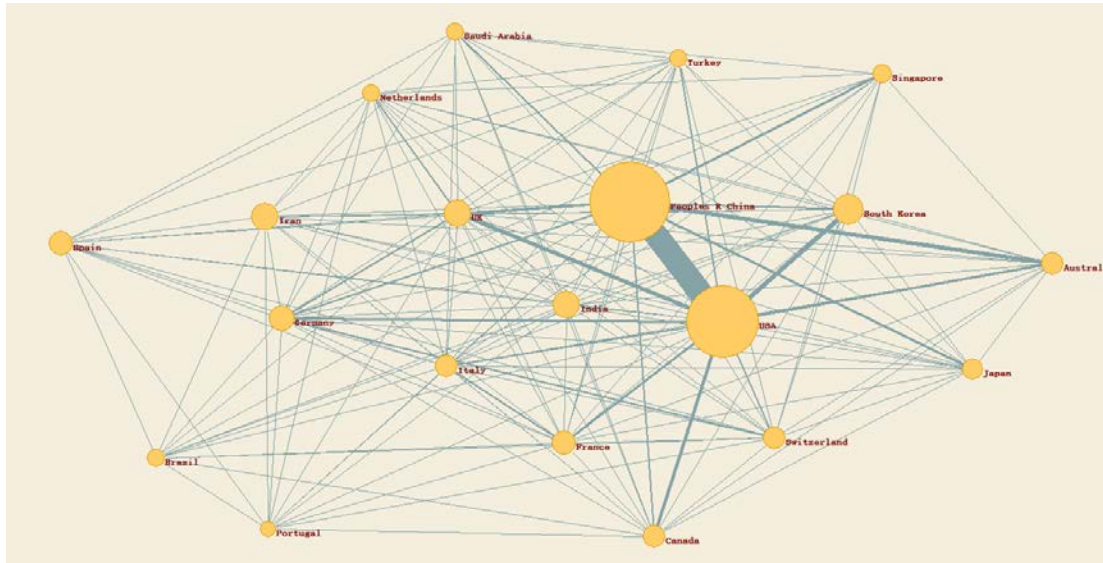

**Fig. S1 Countries/territories co-occurrence clustering network by pajek**

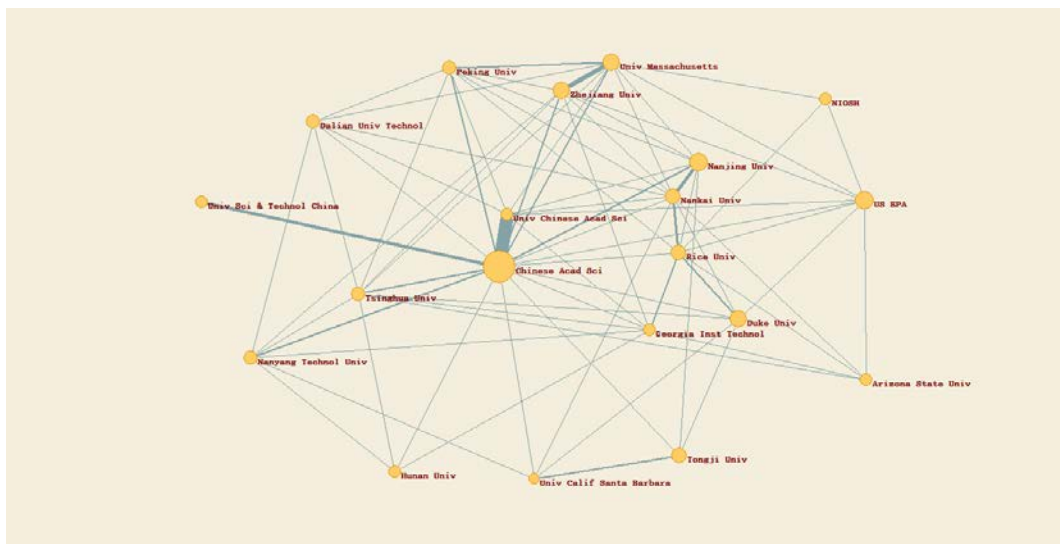

**Fig. S2 institutions co-occurrence clustering network by pajek**

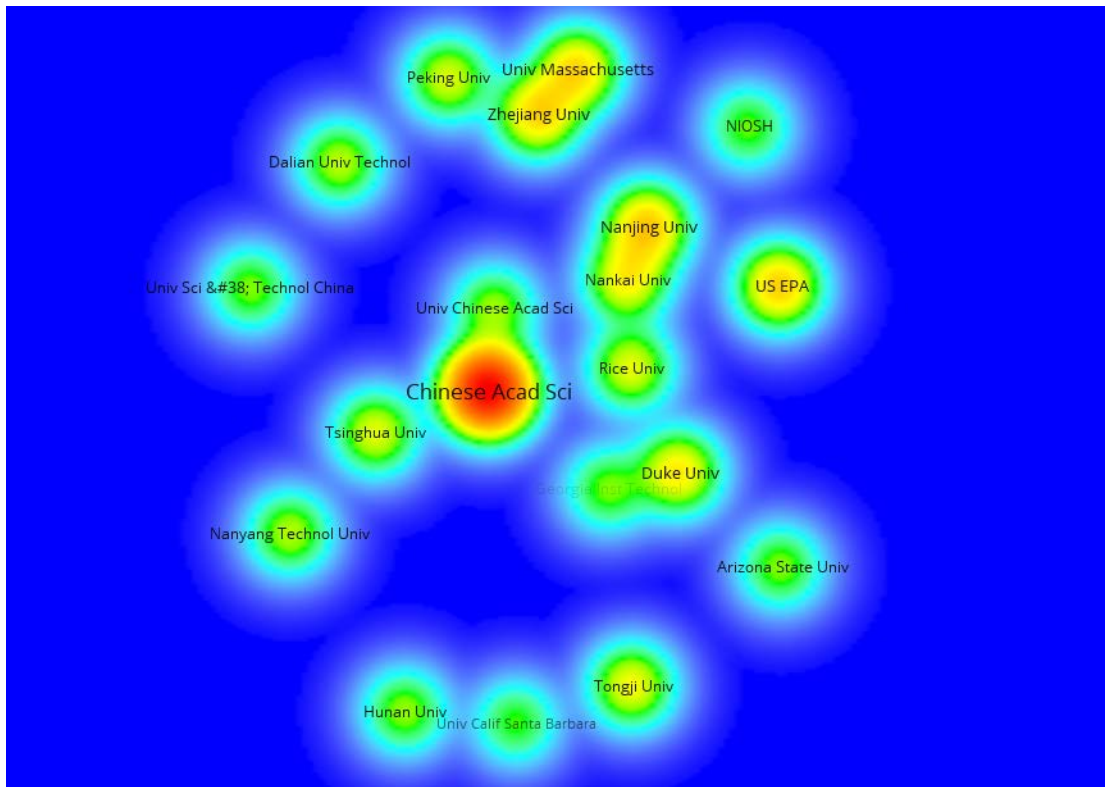

**Fig. S3 High-impact institutions of density view by VOSviewer**

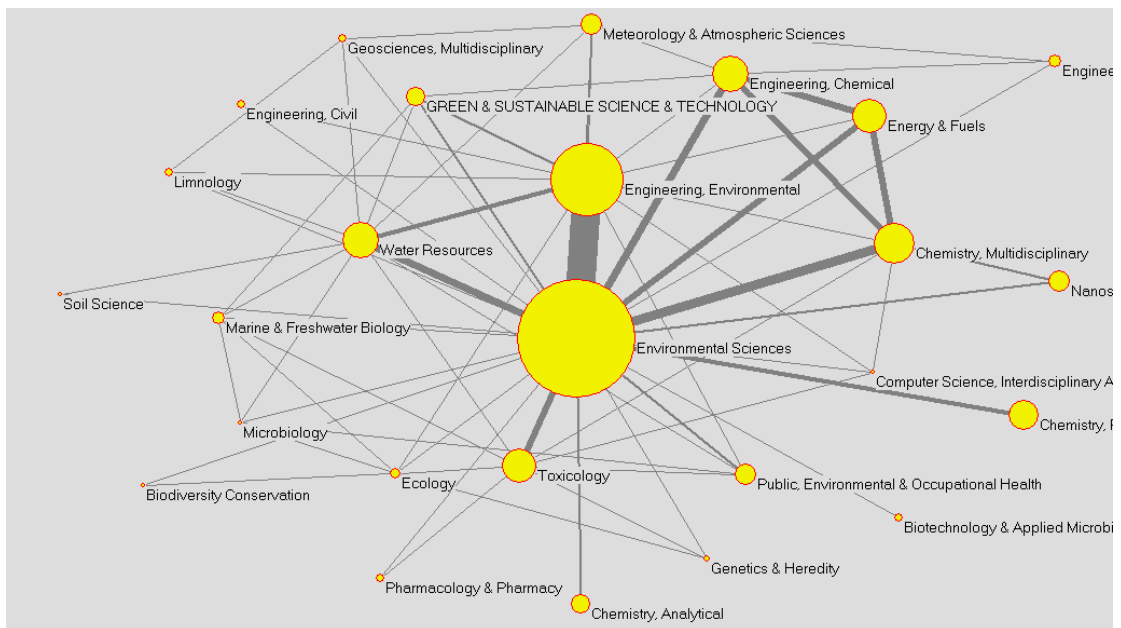

**Fig. S4 Web of science categories co-occurrence clustering network by pajek**

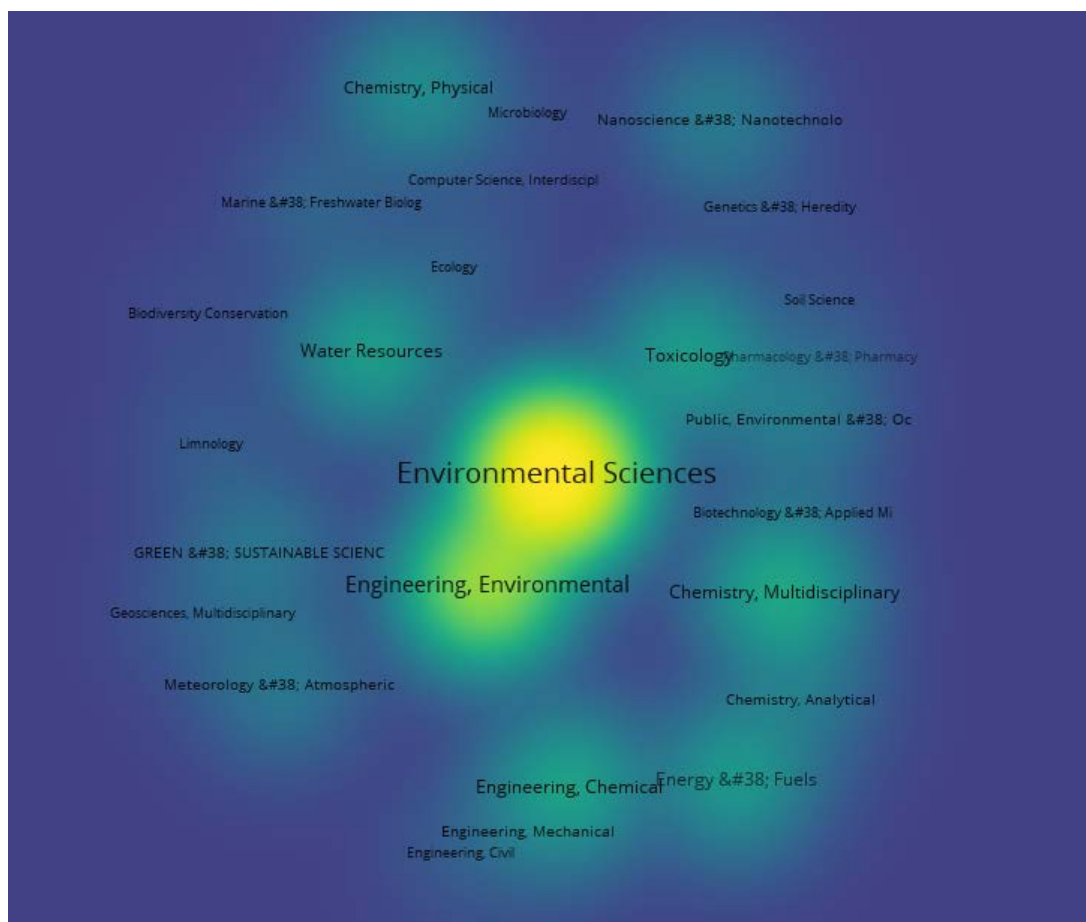

**Fig. S5** Hot Web of science categories of density view by VOSviewer

**Table.S1** Cluster summary of co-citation analysis by Citespace

| ClusterID | Size | Silhouette | mean(Year) | Label (LSI)                                                                                                                                                                                                                                                                                                                                                                    | Label (LLR)                                                                                                                                                                                                                                                                                                                                                                                                                                                                                                                                                                                                                                                                                                                                                                                                                                                                                                                                                                                                                                                                                                                                                                                                                                                                                                                                                                                                                                                                                                                                                                                                                                                                | Label (MI)                                                                                                                                                                                                                                                                                                                                                                                                                                                                                                                                                                                                                                                                                                                                                                                                                                                                                                                                                                                                                                                                                                                                                                    |
|-----------|------|------------|------------|--------------------------------------------------------------------------------------------------------------------------------------------------------------------------------------------------------------------------------------------------------------------------------------------------------------------------------------------------------------------------------|----------------------------------------------------------------------------------------------------------------------------------------------------------------------------------------------------------------------------------------------------------------------------------------------------------------------------------------------------------------------------------------------------------------------------------------------------------------------------------------------------------------------------------------------------------------------------------------------------------------------------------------------------------------------------------------------------------------------------------------------------------------------------------------------------------------------------------------------------------------------------------------------------------------------------------------------------------------------------------------------------------------------------------------------------------------------------------------------------------------------------------------------------------------------------------------------------------------------------------------------------------------------------------------------------------------------------------------------------------------------------------------------------------------------------------------------------------------------------------------------------------------------------------------------------------------------------------------------------------------------------------------------------------------------------|-------------------------------------------------------------------------------------------------------------------------------------------------------------------------------------------------------------------------------------------------------------------------------------------------------------------------------------------------------------------------------------------------------------------------------------------------------------------------------------------------------------------------------------------------------------------------------------------------------------------------------------------------------------------------------------------------------------------------------------------------------------------------------------------------------------------------------------------------------------------------------------------------------------------------------------------------------------------------------------------------------------------------------------------------------------------------------------------------------------------------------------------------------------------------------|
| 0         | 28   | 0.96       | 2006       | adsorption; influence; single-walled carbon nanotubes; naphthalene sorption; cationic surfactant; conformation; multiwalled carbon nanotubes; presence; absence; organic matter   carbon nanotubes; natural organic matter; atrazine; modeling; thermodynamics; conformation; coagulation; surface-modified carbon nanotubes; determining environmental impacts; nanoparticles | carbon nanotube (285.98, 1.0E-4); multi-walled carbon nanotube (218.83, 1.0E-4); using carbon (150.1, 1.0E-4); nanoparticle-conjugated polymer nanocomposite (150.1, 1.0E-4); naphthalene sorption (137.56, 1.0E-4); cationic surfactant (137.56, 1.0E-4); carbon fiber (131.3, 1.0E-4); carbonaceous adsorbent (131.3, 1.0E-4); aromatic compound (131.3, 1.0E-4); surface-modified nanoscale carbon (118.77, 1.0E-4); electrolysis method (112.5, 1.0E-4); adsorption properties (112.5, 1.0E-4); trihalomethanes removal (106.24, 1.0E-4); drinking water source (106.24, 1.0E-4); or h2o2 (99.98, 1.0E-4); environmental fulvic acid (99.98, 1.0E-4); dynamic filtration (93.72, 1.0E-4); personal care product (93.72, 1.0E-4); reactive oxygen species production (87.46, 1.0E-4); photochemical behavior (87.46, 1.0E-4); aqueous solution (81.72, 1.0E-4); sorption behaviour (81.2, 1.0E-4); single wall carbon nanotube (74.95, 1.0E-4); nicotine adsorption (74.95, 1.0E-4); metal ion (68.98, 1.0E-4); natural organic matter removal (68.7, 1.0E-4); adsorption equilibrium (62.44, 1.0E-4); sulfur hexafluoride (62.44, 1.0E-4); carbon nanomaterial (61.28, 1.0E-4); silver nanoparticle (61.26, 1.0E-4); water purification (61.24, 1.0E-4); comparative study (59.48, 1.0E-4); pharmaceutical antibiotics (56.98, 1.0E-4); adsorption mechanism (56.19, 1.0E-4); different organic chemical (56.19, 1.0E-4); organic matter (51.42, 1.0E-4); effective removal (49.94, 1.0E-4); amino-functionalized magnetic nanoparticle (49.94, 1.0E-4); polycyclic aromatic hydrocarbon (46.33, 1.0E-4); physicochemical property (43.7, 1.0E-4); fulvic acid (43.03, | triazine-based pollutant (0.28); semi-analytical model (0.28); low-temperature wgs reaction (0.28); ni-ceo2 catalyst (0.28); bulk counterpart (0.28); plasma mass spectrometry (0.28); fullerene df-1 (0.28); rgo core-shell nanocomposite (0.28); ion release kinetics (0.28); promoter effect (0.28); respiratory deposition (0.28); biological tissue (0.28); graphene-supported ni (0.28); radiosensitive mammalian cell (0.28); nonmonotonic retention (0.28); phytoremediation system (0.28); combined effect (0.28); using single particle (0.28); polyvinylpyrrolidone-coated silver nanoparticle (0.28); one-step approach (0.28); nano-scale tio2 (0.28); organic carbon (0.25); silver sulfide nanomaterial (0.25); bacterial tactic response (0.25); amino modification (0.25); magna straus (0.25); physiochemical properties (0.25); electrochemical filter (0.25); siberian sturgeon (0.25); test media (0.25); nitrogen-fixing bacteria (0.25); potential toxicity (0.25); oxide-based nanomaterial (0.25); common aqueous antibiotic tetracycline (0.25); juvenile carp (0.25); cnt size (0.25); aquatic chemistry (0.25); methyl violet (0.23); bone marrow |

|  |  |  |  |                                                                                                                                                                                                                                                                                                                                                                                                                                                                                                                                                                                                                                                                                                                                                                                                                                                                                                                                                                                                                                                                                                                                                                                                                                                                                                                                                                                                                                                                                                                                                                                                                                                                                                                                                       |                                                                                                                                                                                                                                                                                                                                                                                                                                                                                                                                                                                                                                                                                                                                                                                                                                                                                                                                                                                                                                                                                                                                                                                                        |
|--|--|--|--|-------------------------------------------------------------------------------------------------------------------------------------------------------------------------------------------------------------------------------------------------------------------------------------------------------------------------------------------------------------------------------------------------------------------------------------------------------------------------------------------------------------------------------------------------------------------------------------------------------------------------------------------------------------------------------------------------------------------------------------------------------------------------------------------------------------------------------------------------------------------------------------------------------------------------------------------------------------------------------------------------------------------------------------------------------------------------------------------------------------------------------------------------------------------------------------------------------------------------------------------------------------------------------------------------------------------------------------------------------------------------------------------------------------------------------------------------------------------------------------------------------------------------------------------------------------------------------------------------------------------------------------------------------------------------------------------------------------------------------------------------------|--------------------------------------------------------------------------------------------------------------------------------------------------------------------------------------------------------------------------------------------------------------------------------------------------------------------------------------------------------------------------------------------------------------------------------------------------------------------------------------------------------------------------------------------------------------------------------------------------------------------------------------------------------------------------------------------------------------------------------------------------------------------------------------------------------------------------------------------------------------------------------------------------------------------------------------------------------------------------------------------------------------------------------------------------------------------------------------------------------------------------------------------------------------------------------------------------------|
|  |  |  |  | <p>1.0E-4); graphene oxide (36.51, 1.0E-4); competitive adsorption (33.58, 1.0E-4); aqueous solution chemistry (32.78, 1.0E-4); nanosized alumina (31.2, 1.0E-4); carbonaceous nanoparticle (30.57, 1.0E-4); monoaromatic compound (30.17, 1.0E-4); multiwalled carbon nanotube (28.83, 1.0E-4); suwannee river (27.3, 1.0E-4); adsorbed phenanthrene (26.79, 1.0E-4); black carbon (26.79, 1.0E-4); microwave-induced carbon nanotube (24.96, 1.0E-4); surface-modified carbon nanotube (23.44, 1.0E-4); tio2 nanoparticle (22.88, 1.0E-4); single-walled carbon nanotube (21.1, 1.0E-4); available carbon nanotube (20.13, 1.0E-4); solution chemistry (20.08, 1.0E-4); methyl violet (18.72, 1.0E-4); synthetic organic chemical (18.07, 1.0E-4); background solution chemistry (18.07, 1.0E-4); engineered nanoparticle (16.51, 1.0E-4); wastewater treatment (14.87, 0.001); alpha-ethinyl estradiol (14.6, 0.001); adsorption kinetics (14.6, 0.001); zinc oxide nanoparticle (14.06, 0.001); inorganic nanoparticle (13.42, 0.001); titanium dioxide (12.69, 0.001); organic carbon (12.48, 0.001); titanium dioxide nanoparticle (10.16, 0.005); graphene oxide nanomaterial (9.33, 0.005); zno nanoparticle (8.88, 0.005); gold nanoparticle (8.88, 0.005); metal oxide nanoparticle (8.5, 0.005); natural water (8.24, 0.005); indoor corona device (7.81, 0.01); c-60 fullerene (7.43, 0.01); porous media (7.19, 0.01); ceo2 nanoparticle (6.88, 0.01); silver ion (6.7, 0.01); triazine-based pollutant (6.23, 0.05); coated silver nanoparticle (5.88, 0.05); earthworm eisenia fetida (5.88, 0.05); anaerobic digestion (5.7, 0.05); mesoporous carbon (5.62, 0.05); plant species (5.43, 0.05); theoretical studies (5.34, 0.05);</p> | <p>cell (0.23); colloidal sio2 (0.23); double-layer compression (0.23); illumination mode (0.23); sludge digestion (0.23); environmental effect (0.23); swiss-webster mice (0.23); size characterization (0.23); containing waste incineration residue (0.23); histopathological effect (0.23); bulk zno (0.23); titanium nitride nanotube (0.23); free-living nematode caenorhabditis elegans (0.23); polymer-stabilised nanoparticle (0.23); soil mixture (0.23); pilot wastewater treatment plant (0.23); charge neutralization (0.23); electrochemical capacitive energy storage (0.23); coaxial array (0.23); multi-angle light scattering (0.23); field-flow fractionation (0.23); asymmetrical flow (0.23); comparative phototoxicity (0.23); electrolyte species (0.23); commercial tio2 nanoparticle (0.23); explicit fate modelling (0.23); microwave-induced carbon nanotube (0.22); sorption behavior (0.21); natural soil system (0.21); polyaromatic hydrocarbon (0.21); characterization factor (0.21); seventeen subcontinental freshwater (0.21); field study (0.21); green algae (0.21); agcl nanoparticle (0.21); ceriodaphnia dubia (0.21); urban soil (0.21); using different</p> |
|--|--|--|--|-------------------------------------------------------------------------------------------------------------------------------------------------------------------------------------------------------------------------------------------------------------------------------------------------------------------------------------------------------------------------------------------------------------------------------------------------------------------------------------------------------------------------------------------------------------------------------------------------------------------------------------------------------------------------------------------------------------------------------------------------------------------------------------------------------------------------------------------------------------------------------------------------------------------------------------------------------------------------------------------------------------------------------------------------------------------------------------------------------------------------------------------------------------------------------------------------------------------------------------------------------------------------------------------------------------------------------------------------------------------------------------------------------------------------------------------------------------------------------------------------------------------------------------------------------------------------------------------------------------------------------------------------------------------------------------------------------------------------------------------------------|--------------------------------------------------------------------------------------------------------------------------------------------------------------------------------------------------------------------------------------------------------------------------------------------------------------------------------------------------------------------------------------------------------------------------------------------------------------------------------------------------------------------------------------------------------------------------------------------------------------------------------------------------------------------------------------------------------------------------------------------------------------------------------------------------------------------------------------------------------------------------------------------------------------------------------------------------------------------------------------------------------------------------------------------------------------------------------------------------------------------------------------------------------------------------------------------------------|

|   |    |       |      |                                                                                                                                                                                                                                                                                                                                    |                                                                                                                                                                                                                                                                                                                                                                                                                                                                                                                                                                                                                                                         |                                                                                                                                                                                                                                                                                                                                                                                                                                                                                                                                                                                                                                                                                                                                                                 |
|---|----|-------|------|------------------------------------------------------------------------------------------------------------------------------------------------------------------------------------------------------------------------------------------------------------------------------------------------------------------------------------|---------------------------------------------------------------------------------------------------------------------------------------------------------------------------------------------------------------------------------------------------------------------------------------------------------------------------------------------------------------------------------------------------------------------------------------------------------------------------------------------------------------------------------------------------------------------------------------------------------------------------------------------------------|-----------------------------------------------------------------------------------------------------------------------------------------------------------------------------------------------------------------------------------------------------------------------------------------------------------------------------------------------------------------------------------------------------------------------------------------------------------------------------------------------------------------------------------------------------------------------------------------------------------------------------------------------------------------------------------------------------------------------------------------------------------------|
|   |    |       |      |                                                                                                                                                                                                                                                                                                                                    | <p>cuo nanoparticle (5.25, 0.05); environmental risk assessment (5.07, 0.05); graphene oxide nanoparticle (4.89, 0.05); algal toxicity (4.89, 0.05); modeling technique (4.89, 0.05); chemical transformation (4.79, 0.05); danio rerio (4.71, 0.05); daphnia magna (4.64, 0.05); toxicity effect (4.62, 0.05); cucurbita pepo (4.62, 0.05); ionizable aromatic compound (4.55, 0.05); oxidized multiwalled carbon nanotube (4.55, 0.05); microbial communities (4.53, 0.05); aerosol exposure mode (4.43, 0.05)</p>                                                                                                                                    | <p>reducing agent (0.21); dunaliella tertiolecta (0.21); mediating c-60 phototransformation (0.21); chlorella vulgaris (0.21); surface complexation modeling (0.21); screening evaluation (0.21); methodological consideration (0.21); sewer system (0.21); inhibitory effect (0.21); vitro test (0.21); tetrahymena thermophila (0.21); nanoscale metal oxide (0.21); synergistic toxic effect (0.21); reduced graphene oxide material (0.21); direct feeding (0.21); bacterial community structure (0.21); different release scenario (0.21); nanosized alumina (0.21); other natural adsorbent (0.2); wavelength dependency (0.2); sativus I (0.2); diesel soot (0.2); part 2-toxicity (0.2); product characterization (0.2); anatase nanoparticle (0.2)</p> |
| 1 | 25 | 0.974 | 2006 | <p>carbon nanotubes; effect; porous media; retention; bacteria; transport; nanoparticles; impacts; evidence; wastewater   single-walled carbon nanotubes; toxic effects; development; coli; rats; pulmonary toxicity; instilled multiwall carbon nanotubes; male fischer; bone marrow cells; determining environmental impacts</p> | <p>multi-wall carbon nanotube (149.21, 1.0E-4); new health risk (149.21, 1.0E-4); carbon nanotube (144.18, 1.0E-4); oxidation reaction (142.43, 1.0E-4); normal human embryonic lung cell (128.89, 1.0E-4); single-walled carbon nanotube (124.33, 1.0E-4); pulmonary toxicity (122.13, 1.0E-4); male fischer (122.13, 1.0E-4); instilled multiwall carbon nanotube (122.13, 1.0E-4); murine lung (115.38, 1.0E-4); human lung fibroblast (108.63, 1.0E-4); direct fibrogenic effect (108.63, 1.0E-4); sludge process (101.89, 1.0E-4); subchronic exposure (97.54, 1.0E-4); world trade center (95.16, 1.0E-4); lung disease (95.16, 1.0E-4); case</p> | <p>semi-analytical model (0.2); respiratory deposition (0.2); low-temperature wgs reaction (0.2); ni-ceo2 catalyst (0.2); bulk counterpart (0.2); plasma mass spectrometry (0.2); fullerene df-1 (0.2); rgo core-shell nanocomposite (0.2); ion release kinetics (0.2); promoter effect (0.2); biological tissue (0.2); graphene-supported ni (0.2); radiosensitive mammalian cell (0.2); nonmonotonic retention (0.2); phytoremediation system (0.2); triazine-</p>                                                                                                                                                                                                                                                                                            |

|                                                                                                                                                                                                                                                                                                                                                                                                                                                                                                                                                                                                                                                                                                                                                                                                                                                                                                                                                                                                                                                                                                                                                                                                                                                                                                                                                                                                                                                                                                                                                                                                                                                                                                                                                           |                                                                                                                                                                                                                                                                                                                                                                                                                                                                                                                                                                                                                                                                                                                                                                                                                                                                                                                                                                                                                                                                                                                                                                                                              |
|-----------------------------------------------------------------------------------------------------------------------------------------------------------------------------------------------------------------------------------------------------------------------------------------------------------------------------------------------------------------------------------------------------------------------------------------------------------------------------------------------------------------------------------------------------------------------------------------------------------------------------------------------------------------------------------------------------------------------------------------------------------------------------------------------------------------------------------------------------------------------------------------------------------------------------------------------------------------------------------------------------------------------------------------------------------------------------------------------------------------------------------------------------------------------------------------------------------------------------------------------------------------------------------------------------------------------------------------------------------------------------------------------------------------------------------------------------------------------------------------------------------------------------------------------------------------------------------------------------------------------------------------------------------------------------------------------------------------------------------------------------------|--------------------------------------------------------------------------------------------------------------------------------------------------------------------------------------------------------------------------------------------------------------------------------------------------------------------------------------------------------------------------------------------------------------------------------------------------------------------------------------------------------------------------------------------------------------------------------------------------------------------------------------------------------------------------------------------------------------------------------------------------------------------------------------------------------------------------------------------------------------------------------------------------------------------------------------------------------------------------------------------------------------------------------------------------------------------------------------------------------------------------------------------------------------------------------------------------------------|
| <p>report (95.16, 1.0E-4); dust sample (95.16, 1.0E-4); world trade center patient (95.16, 1.0E-4); human cell line (88.44, 1.0E-4); engineered carbon nanotube (88.44, 1.0E-4); vitro evaluation (88.44, 1.0E-4); intratracheal instillation study (81.74, 1.0E-4); epithelial barrier (75.04, 1.0E-4); air-pollution particle (75.04, 1.0E-4); lung alveolar (75.04, 1.0E-4); nanomaterial interaction (75.04, 1.0E-4); dialkyl phthalate ester (68.36, 1.0E-4); toxic effect (68.33, 1.0E-4); multiwall carbon nanotube (67.48, 1.0E-4); viral removal (61.49, 1.0E-4); single-walled carbon nanotube filter (61.49, 1.0E-4); removing bioaerosol (47.81, 1.0E-4); carbon nanotube filter (47.81, 1.0E-4); health effect (44.15, 1.0E-4); silver nanoparticle (43.65, 1.0E-4); new ingredient (40.98, 1.0E-4); aqueous solution (35.77, 1.0E-4); ovary cell (34.14, 1.0E-4); anatase titanium dioxide (34.14, 1.0E-4); graphene oxide (27.07, 1.0E-4); chronic exposure (25.9, 1.0E-4); multiwalled carbon nanotube (25.45, 1.0E-4); multi-walled carbon nanotube (22.43, 1.0E-4); environmental effect (20.48, 1.0E-4); consumer product (16.85, 1.0E-4); tio2 nanoparticle (15.64, 1.0E-4); cnt size (13.65, 0.001); engineered nanoparticle (12.24, 0.001); wastewater treatment (11.02, 0.001); zinc oxide nanoparticle (10.42, 0.005); c-60 derivative (9.97, 0.005); titanium dioxide (9.41, 0.005); engineered nanomaterial (8.62, 0.005); aquatic environment (7.38, 0.01); acute pulmonary toxicity (7.1, 0.01); fullerene nanoparticle (6.92, 0.01); graphene oxide nanomaterial (6.92, 0.01); semi-analytical model (6.82, 0.01); respiratory deposition (6.82, 0.01); comparative photoactivity (6.67, 0.01); antibacterial properties</p> | <p>based pollutant (0.2); combined effect (0.2); using single particle (0.2); polyvinylpyrrolidone-coated silver nanoparticle (0.2); one-step approach (0.2); nano-scale tio2 (0.2); cnt size (0.17); silver sulfide nanomaterial (0.17); bacterial tactic response (0.17); amino modification (0.17); magna straus (0.17); physiochemical properties (0.17); electrochemical filter (0.17); siberian sturgeon (0.17); test media (0.17); nitrogen-fixing bacteria (0.17); potential toxicity (0.17); oxide-based nanomaterial (0.17); common aqueous antibiotic tetracycline (0.17); juvenile carp (0.17); organic carbon (0.17); aquatic chemistry (0.17); environmental effect (0.16); bone marrow cell (0.16); swiss-webster mice (0.16); colloidal sio2 (0.16); double-layer compression (0.16); illumination mode (0.16); sludge digestion (0.16); size characterization (0.16); containing waste incineration residue (0.16); histopathological effect (0.16); bulk zno (0.16); titanium nitride nanotube (0.16); free-living nematode caenorhabditis elegans (0.16); polymer-stabilised nanoparticle (0.16); soil mixture (0.16); pilot wastewater treatment plant (0.16); charge neutralization</p> |
|-----------------------------------------------------------------------------------------------------------------------------------------------------------------------------------------------------------------------------------------------------------------------------------------------------------------------------------------------------------------------------------------------------------------------------------------------------------------------------------------------------------------------------------------------------------------------------------------------------------------------------------------------------------------------------------------------------------------------------------------------------------------------------------------------------------------------------------------------------------------------------------------------------------------------------------------------------------------------------------------------------------------------------------------------------------------------------------------------------------------------------------------------------------------------------------------------------------------------------------------------------------------------------------------------------------------------------------------------------------------------------------------------------------------------------------------------------------------------------------------------------------------------------------------------------------------------------------------------------------------------------------------------------------------------------------------------------------------------------------------------------------|--------------------------------------------------------------------------------------------------------------------------------------------------------------------------------------------------------------------------------------------------------------------------------------------------------------------------------------------------------------------------------------------------------------------------------------------------------------------------------------------------------------------------------------------------------------------------------------------------------------------------------------------------------------------------------------------------------------------------------------------------------------------------------------------------------------------------------------------------------------------------------------------------------------------------------------------------------------------------------------------------------------------------------------------------------------------------------------------------------------------------------------------------------------------------------------------------------------|





|   |    |       |      |                                                                                                                                                                                                                                                                                                                                                                                                                                                                        |                                                                                                                                                                                                                                                                                                                                                                                                                                                                                                                                                                                                                                                                                                                                                                                                                                                                                                                                                                                                                                                                                                                                                                                                                                                                                                                                                                                                                                                  |                                                                                                                                                                                                                                                                                                                                                                                                                                                                                                                                                                                                                                                                                                                                                                                                                                                                                                                                                                                                                    |
|---|----|-------|------|------------------------------------------------------------------------------------------------------------------------------------------------------------------------------------------------------------------------------------------------------------------------------------------------------------------------------------------------------------------------------------------------------------------------------------------------------------------------|--------------------------------------------------------------------------------------------------------------------------------------------------------------------------------------------------------------------------------------------------------------------------------------------------------------------------------------------------------------------------------------------------------------------------------------------------------------------------------------------------------------------------------------------------------------------------------------------------------------------------------------------------------------------------------------------------------------------------------------------------------------------------------------------------------------------------------------------------------------------------------------------------------------------------------------------------------------------------------------------------------------------------------------------------------------------------------------------------------------------------------------------------------------------------------------------------------------------------------------------------------------------------------------------------------------------------------------------------------------------------------------------------------------------------------------------------|--------------------------------------------------------------------------------------------------------------------------------------------------------------------------------------------------------------------------------------------------------------------------------------------------------------------------------------------------------------------------------------------------------------------------------------------------------------------------------------------------------------------------------------------------------------------------------------------------------------------------------------------------------------------------------------------------------------------------------------------------------------------------------------------------------------------------------------------------------------------------------------------------------------------------------------------------------------------------------------------------------------------|
|   |    |       |      |                                                                                                                                                                                                                                                                                                                                                                                                                                                                        |                                                                                                                                                                                                                                                                                                                                                                                                                                                                                                                                                                                                                                                                                                                                                                                                                                                                                                                                                                                                                                                                                                                                                                                                                                                                                                                                                                                                                                                  | cell (0.14); anatase titanium dioxide (0.14); wavelength dependency (0.14); sativus 1 (0.14); diesel soot (0.14); part 2-toxicity (0.14); product characterization (0.14); anatase nanoparticle (0.14)                                                                                                                                                                                                                                                                                                                                                                                                                                                                                                                                                                                                                                                                                                                                                                                                             |
| 2 | 24 | 0.984 | 2013 | engineered nanomaterials; coordinating modeling; life cycle assessment studies; experimental research; transformations; form; reactive porous media; nanomaterial environmental fate; environmental fate modeling; gold nanoparticles   nanoparticles; fate; case study; seventeen subcontinental freshwaters; characterization factors; copper nanoparticles; reactive porous media; nanomaterial environmental fate; environmental fate modeling; gold nanoparticles | subtle effect (167.39, 1.0E-4); alpha-ethynylestradiol adsorption (162.45, 1.0E-4); risk quantification (157.52, 1.0E-4); effect modeling (157.52, 1.0E-4); probabilistic exposure (157.52, 1.0E-4); surface water chemical parameter (152.59, 1.0E-4); influencing fate (152.59, 1.0E-4); colloid facilitated contaminant transport (152.59, 1.0E-4); using dynamic probabilistic modeling (142.72, 1.0E-4); changing world (142.72, 1.0E-4); future environmental emission (142.72, 1.0E-4); envisioning nano release dynamics (142.72, 1.0E-4); environmental exposure assessment (137.79, 1.0E-4); lake retention (132.86, 1.0E-4); natural clay colloid (127.93, 1.0E-4); modeling aggregation (123, 1.0E-4); regulatory oversight (118.07, 1.0E-4); nanomaterial life cycle (118.07, 1.0E-4); cerium oxide (114.26, 1.0E-4); wastewater-derived organic matter (113.14, 1.0E-4); hematite colloid (108.22, 1.0E-4); earthworm eisenia fetida (104.42, 1.0E-4); engineered nanomaterial (104.11, 1.0E-4); marine scallop chlamy (103.29, 1.0E-4); integrated biomarker approach (103.29, 1.0E-4); environmental relevant concentration (103.29, 1.0E-4); nanoparticulate hematite (93.44, 1.0E-4); nanosilver size (88.51, 1.0E-4); coating variation (88.51, 1.0E-4); using lumbriculus variegatus (88.51, 1.0E-4); waste management (78.67, 1.0E-4); use activities (78.67, 1.0E-4); environmental releases (78.67, 1.0E-4); manufactured | semi-analytical model (0.59); low-temperature wgs reaction (0.59); niceo2 catalyst (0.59); bulk counterpart (0.59); plasma mass spectrometry (0.59); fullerene df-1 (0.59); rgo core-shell nanocomposite (0.59); ion release kinetics (0.59); promoter effect (0.59); respiratory deposition (0.59); biological tissue (0.59); graphene-supported ni (0.59); radiosensitive mammalian cell (0.59); nonmonotonic retention (0.59); phytoremediation system (0.59); triazine-based pollutant (0.59); combined effect (0.59); using single particle (0.59); polyvinylpyrrolidone-coated silver nanoparticle (0.59); one-step approach (0.59); nano-scale tio2 (0.59); silver sulfide nanomaterial (0.53); bacterial tactic response (0.53); amino modification (0.53); magna straus (0.53); physiochemical properties (0.53); electrochemical filter (0.53); siberian sturgeon (0.53); test media (0.53); nitrogen-fixing bacteria (0.53); potential toxicity (0.53); oxide-based nanomaterial (0.53); common aqueous |

|  |                                                                                                                                                                                                                                                                                                                                                                                                                                                                                                                                                                                                                                                                                                                                                                                                                                                                                                                                                                                                                                                                                                                                                                                                                                                                                                                                                                                                                                                                                                                                                                                                                                                                                                                               |                                                                                                                                                                                                                                                                                                                                                                                                                                                                                                                                                                                                                                                                                                                                                                                                                                                                                                                                                                                                                                                                                                                                                                                                                                                                       |
|--|-------------------------------------------------------------------------------------------------------------------------------------------------------------------------------------------------------------------------------------------------------------------------------------------------------------------------------------------------------------------------------------------------------------------------------------------------------------------------------------------------------------------------------------------------------------------------------------------------------------------------------------------------------------------------------------------------------------------------------------------------------------------------------------------------------------------------------------------------------------------------------------------------------------------------------------------------------------------------------------------------------------------------------------------------------------------------------------------------------------------------------------------------------------------------------------------------------------------------------------------------------------------------------------------------------------------------------------------------------------------------------------------------------------------------------------------------------------------------------------------------------------------------------------------------------------------------------------------------------------------------------------------------------------------------------------------------------------------------------|-----------------------------------------------------------------------------------------------------------------------------------------------------------------------------------------------------------------------------------------------------------------------------------------------------------------------------------------------------------------------------------------------------------------------------------------------------------------------------------------------------------------------------------------------------------------------------------------------------------------------------------------------------------------------------------------------------------------------------------------------------------------------------------------------------------------------------------------------------------------------------------------------------------------------------------------------------------------------------------------------------------------------------------------------------------------------------------------------------------------------------------------------------------------------------------------------------------------------------------------------------------------------|
|  | nanoparticle (77.18, 1.0E-4); functional tio2 nanoparticle (73.75, 1.0E-4); aqueous environment (73.75, 1.0E-4); graphene oxide (72.45, 1.0E-4); citrate-stabilized gold nanoparticle (68.17, 1.0E-4); cerium translocation (63.9, 1.0E-4); oxide nanoparticle (63.9, 1.0E-4); kidney bean plant (63.9, 1.0E-4); physiological processes (63.9, 1.0E-4); porous media (60.28, 1.0E-4); reactive porous media (58.99, 1.0E-4); standardized abrasion condition (54.07, 1.0E-4); environmental release (54.07, 1.0E-4); commercial tile (54.07, 1.0E-4); molecular response (49.15, 1.0E-4); binary combination (49.15, 1.0E-4); perfluorooctane sulfonate (44.23, 1.0E-4); engineered nanoparticle (43.73, 1.0E-4); algal toxicity (42.32, 1.0E-4); inorganic nanoparticle (42.09, 1.0E-4); cerium oxide nanoparticle (39.31, 1.0E-4); pyrolyzed biomass (39.31, 1.0E-4); case study (35.64, 1.0E-4); caenorhabditis elegans (34.4, 1.0E-4); ceria nanoparticle (34.4, 1.0E-4); solution chemistry (32.04, 1.0E-4); freshwater ecotoxicity characterisation factor (29.48, 1.0E-4); zinc oxide nanoparticle (27.05, 1.0E-4); single walled carbon nanotube (26.73, 1.0E-4); aqueous solution (25.19, 1.0E-4); building material (24.56, 1.0E-4); single-walled carbon nanotube (23.12, 1.0E-4); carbon nanotube (22.43, 1.0E-4); characterization factor (19.65, 1.0E-4); seventeen subcontinental freshwater (19.65, 1.0E-4); daphnia magna (19.06, 1.0E-4); titanium dioxide nanoparticle (18.63, 1.0E-4); fullerene nanoparticle (18.52, 1.0E-4); graphene oxide nanomaterial (18.52, 1.0E-4); humic acid (17.75, 1.0E-4); titanium dioxide (14.95, 0.001); containing waste incineration residue (14.73, 0.001); cucurbita | antibiotic tetracycline (0.53); juvenile carp (0.53); cnt size (0.53); organic carbon (0.53); aquatic chemistry (0.53); containing waste incineration residue (0.5); bone marrow cell (0.5); colloidal sio2 (0.5); double-layer compression (0.5); illumination mode (0.5); sludge digestion (0.5); environmental effect (0.5); swiss-webster mice (0.5); size characterization (0.5); histopathological effect (0.5); bulk zno (0.5); titanium nitride nanotube (0.5); free-living nematode caenorhabditis elegans (0.5); polymer-stabilised nanoparticle (0.5); soil mixture (0.5); pilot wastewater treatment plant (0.5); charge neutralization (0.5); electrochemical capacitive energy storage (0.5); coaxial array (0.5); multi-angle light scattering (0.5); methyl violet (0.5); field-flow fractionation (0.5); asymmetrical flow (0.5); comparative phototoxicity (0.5); electrolyte species (0.5); commercial tio2 nanoparticle (0.5); explicit fate modelling (0.5); characterization factor (0.48); seventeen subcontinental freshwater (0.48); sorption behavior (0.48); field study (0.48); natural soil system (0.48); green algae (0.48); microwave-induced carbon nanotube (0.48); agcl nanoparticle (0.48); ceriodaphnia dubia (0.48); urban soil |
|--|-------------------------------------------------------------------------------------------------------------------------------------------------------------------------------------------------------------------------------------------------------------------------------------------------------------------------------------------------------------------------------------------------------------------------------------------------------------------------------------------------------------------------------------------------------------------------------------------------------------------------------------------------------------------------------------------------------------------------------------------------------------------------------------------------------------------------------------------------------------------------------------------------------------------------------------------------------------------------------------------------------------------------------------------------------------------------------------------------------------------------------------------------------------------------------------------------------------------------------------------------------------------------------------------------------------------------------------------------------------------------------------------------------------------------------------------------------------------------------------------------------------------------------------------------------------------------------------------------------------------------------------------------------------------------------------------------------------------------------|-----------------------------------------------------------------------------------------------------------------------------------------------------------------------------------------------------------------------------------------------------------------------------------------------------------------------------------------------------------------------------------------------------------------------------------------------------------------------------------------------------------------------------------------------------------------------------------------------------------------------------------------------------------------------------------------------------------------------------------------------------------------------------------------------------------------------------------------------------------------------------------------------------------------------------------------------------------------------------------------------------------------------------------------------------------------------------------------------------------------------------------------------------------------------------------------------------------------------------------------------------------------------|

|   |    |       |      |                                                                                                                                                                                                                                                                                    |                                                                                                                                                                                                                                                                                                                                                                                                                                                                                                                                                                                                                                                                                                                                                                                                                                                                                                      |                                                                                                                                                                                                                                                                                                                                                                                                                                                                                                                                                                                                                                                                                                                                                                                                                    |
|---|----|-------|------|------------------------------------------------------------------------------------------------------------------------------------------------------------------------------------------------------------------------------------------------------------------------------------|------------------------------------------------------------------------------------------------------------------------------------------------------------------------------------------------------------------------------------------------------------------------------------------------------------------------------------------------------------------------------------------------------------------------------------------------------------------------------------------------------------------------------------------------------------------------------------------------------------------------------------------------------------------------------------------------------------------------------------------------------------------------------------------------------------------------------------------------------------------------------------------------------|--------------------------------------------------------------------------------------------------------------------------------------------------------------------------------------------------------------------------------------------------------------------------------------------------------------------------------------------------------------------------------------------------------------------------------------------------------------------------------------------------------------------------------------------------------------------------------------------------------------------------------------------------------------------------------------------------------------------------------------------------------------------------------------------------------------------|
|   |    |       |      |                                                                                                                                                                                                                                                                                    | pepo (14.17, 0.001); water purification (14.02, 0.001); arabidopsis thaliana (13.73, 0.001); nanoparticle transport (12.69, 0.001); multiwalled carbon nanotube (12.24, 0.001); aquatic environment (11.95, 0.001); adverse effect (11.15, 0.001); metal ion (10.97, 0.001); theoretical studies (10.61, 0.005); carbon nanomaterial (10.43, 0.005); facile synthesis (10.07, 0.005); suwannee river (9.89, 0.005); graphene oxide nanoparticle (9.71, 0.005); comparative study (9.71, 0.005); modeling technique (9.71, 0.005); silica nanoparticle (9.53, 0.005); multi-walled carbon nanotube (9.15, 0.005); aerosol exposure mode (8.81, 0.005); nano-zno particle (8.63, 0.005); comparative eco-toxicities (8.63, 0.005); bacillus subtilis (8.45, 0.005); ionic strength (8.45, 0.005); relevant nanomaterial (8.27, 0.005); human health risk (8.27, 0.005); escherichia coli (8.27, 0.005) | (0.48); using different reducing agent (0.48); dunaliella tertiolecta (0.48); mediating c-60 phototransformation (0.48); chlorella vulgaris (0.48); surface complexation modeling (0.48); screening evaluation (0.48); methodological consideration (0.48); sewer system (0.48); inhibitory effect (0.48); vitro test (0.48); tetrahymena thermophila (0.48); nanoscale metal oxide (0.48); synergistic toxic effect (0.48); reduced graphene oxide material (0.48); polyaromatic hydrocarbon (0.48); direct feeding (0.48); bacterial community structure (0.48); different release scenario (0.48); building material (0.46); wavelength dependency (0.46); sativus l (0.46); diesel soot (0.46); part 2-toxicity (0.46); product characterization (0.46); anatase nanoparticle (0.46); tio2 nanomaterial (0.46) |
| 3 | 23 | 0.964 | 2011 | fate; silver; nanoparticles; sewerage networks; zinc; danish environment; modeling flows; concentrations; nanotextiles; health effects   silver nanoparticles; nanomaterials; toxicity; soils; full toxicity potential; earthworm eisenia fetida; bioavailability; short-term soil | environmental fate (149.31, 1.0E-4); stream dynamics (149.31, 1.0E-4); watershed-scale model (149.31, 1.0E-4); non-labile silver species (148.76, 1.0E-4); spatio-temporal approach (140.16, 1.0E-4); probabilistic modelling (140.16, 1.0E-4); engineered nanomaterial emission (140.16, 1.0E-4); land application (135.87, 1.0E-4); chemical transformation (132.28, 1.0E-4); diffusive gradient (131.58, 1.0E-4); thin film (131.58, 1.0E-4); x-ray absorption spectroscopy (131.58, 1.0E-4); wastewater treatment (129.72, 1.0E-4); silver nanoparticle sulfidation                                                                                                                                                                                                                                                                                                                              | semi-analytical model (0.72); low-temperature wgs reaction (0.72); niceo2 catalyst (0.72); bulk counterpart (0.72); plasma mass spectrometry (0.72); fullerene df-1 (0.72); rgo core-shell nanocomposite (0.72); ion release kinetics (0.72); promoter effect (0.72); respiratory deposition (0.72); biological tissue (0.72); graphene-supported ni (0.72); radiosensitive mammalian cell (0.72); nonmonotonic retention                                                                                                                                                                                                                                                                                                                                                                                          |

|  |  |  |                                        |                                                                                                                                                                                                                                                                                                                                                                                                                                                                                                                                                                                                                                                                                                                                                                                                                                                                                                                                                                                                                                                                                                                                                                                                                                                                                                                                                                                                                                                                                                                                                                                                                                                                                                                                                               |                                                                                                                                                                                                                                                                                                                                                                                                                                                                                                                                                                                                                                                                                                                                                                                                                                                                                                                                                                                                                                                                                                                                                                                                        |
|--|--|--|----------------------------------------|---------------------------------------------------------------------------------------------------------------------------------------------------------------------------------------------------------------------------------------------------------------------------------------------------------------------------------------------------------------------------------------------------------------------------------------------------------------------------------------------------------------------------------------------------------------------------------------------------------------------------------------------------------------------------------------------------------------------------------------------------------------------------------------------------------------------------------------------------------------------------------------------------------------------------------------------------------------------------------------------------------------------------------------------------------------------------------------------------------------------------------------------------------------------------------------------------------------------------------------------------------------------------------------------------------------------------------------------------------------------------------------------------------------------------------------------------------------------------------------------------------------------------------------------------------------------------------------------------------------------------------------------------------------------------------------------------------------------------------------------------------------|--------------------------------------------------------------------------------------------------------------------------------------------------------------------------------------------------------------------------------------------------------------------------------------------------------------------------------------------------------------------------------------------------------------------------------------------------------------------------------------------------------------------------------------------------------------------------------------------------------------------------------------------------------------------------------------------------------------------------------------------------------------------------------------------------------------------------------------------------------------------------------------------------------------------------------------------------------------------------------------------------------------------------------------------------------------------------------------------------------------------------------------------------------------------------------------------------------|
|  |  |  | <p>bioassays; silver ions; program</p> | <p>(127.31, 1.0E-4); using various analytical technique (123.04, 1.0E-4); littoral lake mesocosm (123.04, 1.0E-4); life cycle assessment (119.6, 1.0E-4); environmental risk assessment (118.94, 1.0E-4); environmental life cycle assessment (118.79, 1.0E-4); nanosilver-enabled bandage (118.79, 1.0E-4); antibacterial product (114.55, 1.0E-4); rapid chromatographic separation (114.55, 1.0E-4); environmental water (114.55, 1.0E-4); silver-containing nanoparticle (114.55, 1.0E-4); dissolvable ag (114.55, 1.0E-4); nanomaterial risk forecasting (106.08, 1.0E-4); functional assay-based strategy (106.08, 1.0E-4); comparative toxicity potential (101.87, 1.0E-4); swiss waste incineration plant (101.08, 1.0E-4); nanometer range (101.08, 1.0E-4); chemical characterization (101.08, 1.0E-4); ash fraction (101.08, 1.0E-4); fly ashe (101.08, 1.0E-4); microplastic exposure assessment (96.83, 1.0E-4); short-term soil bioassay (92.59, 1.0E-4); full toxicity potential (92.59, 1.0E-4); engineered nanoparticle (89.93, 1.0E-4); comprehensive probabilistic modelling (88.37, 1.0E-4); environmental emission (88.37, 1.0E-4); nanoparticle environmental risk modeling (84.16, 1.0E-4); much ado (84.16, 1.0E-4); appropriate fate descriptor (84.16, 1.0E-4); mesophilic anaerobic digestion (83.38, 1.0E-4); short-term exposure (83.38, 1.0E-4); photoinduced transformation (79.13, 1.0E-4); silver sulfide nanoparticle (79.13, 1.0E-4); rethinking stability (79.13, 1.0E-4); silver standardized nanomaterial (74.89, 1.0E-4); estuarine bivalve scrobicularia plana (74.89, 1.0E-4); surface water (73.06, 1.0E-4); silver speciation (70.67, 1.0E-4); carbon nanotube (67.2, 1.0E-4); recreational lake (66.46, 1.0E-</p> | <p>(0.72); phytoremediation system (0.72); triazine-based pollutant (0.72); combined effect (0.72); using single particle (0.72); polyvinylpyrrolidone-coated silver nanoparticle (0.72); one-step approach (0.72); nano-scale tio2 (0.72); silver sulfide nanomaterial (0.65); nitrogen-fixing bacteria (0.65); bacterial tactic response (0.65); amino modification (0.65); magna straus (0.65); physiochemical properties (0.65); electrochemical filter (0.65); siberian sturgeon (0.65); test media (0.65); potential toxicity (0.65); oxide-based nanomaterial (0.65); common aqueous antibiotic tetracycline (0.65); juvenile carp (0.65); cnt size (0.65); organic carbon (0.65); aquatic chemistry (0.65); explicit fate modelling (0.61); bone marrow cell (0.61); colloidal sio2 (0.61); double-layer compression (0.61); illumination mode (0.61); sludge digestion (0.61); environmental effect (0.61); swiss-webster mice (0.61); size characterization (0.61); containing waste incineration residue (0.61); histopathological effect (0.61); bulk zno (0.61); titanium nitride nanotube (0.61); free-living nematode caenorhabditis elegan (0.61); polymer-stabilised nanoparticle</p> |
|--|--|--|----------------------------------------|---------------------------------------------------------------------------------------------------------------------------------------------------------------------------------------------------------------------------------------------------------------------------------------------------------------------------------------------------------------------------------------------------------------------------------------------------------------------------------------------------------------------------------------------------------------------------------------------------------------------------------------------------------------------------------------------------------------------------------------------------------------------------------------------------------------------------------------------------------------------------------------------------------------------------------------------------------------------------------------------------------------------------------------------------------------------------------------------------------------------------------------------------------------------------------------------------------------------------------------------------------------------------------------------------------------------------------------------------------------------------------------------------------------------------------------------------------------------------------------------------------------------------------------------------------------------------------------------------------------------------------------------------------------------------------------------------------------------------------------------------------------|--------------------------------------------------------------------------------------------------------------------------------------------------------------------------------------------------------------------------------------------------------------------------------------------------------------------------------------------------------------------------------------------------------------------------------------------------------------------------------------------------------------------------------------------------------------------------------------------------------------------------------------------------------------------------------------------------------------------------------------------------------------------------------------------------------------------------------------------------------------------------------------------------------------------------------------------------------------------------------------------------------------------------------------------------------------------------------------------------------------------------------------------------------------------------------------------------------|

|  |  |  |  |                                                                                                                                                                                                                                                                                                                                                                                                                                                                                                                                                                                                                                                                                                                                                                                                                                                                                                                                                                                                                                                                                                                                                                                                                                                                                                                                                                                                                                                                                                                                                                                                                                                                                                                                                                |                                                                                                                                                                                                                                                                                                                                                                                                                                                                                                                                                                                                                                                                                                                                                                                                                                                                                                                                                                                                                                                                                                                                                                                                                                                  |
|--|--|--|--|----------------------------------------------------------------------------------------------------------------------------------------------------------------------------------------------------------------------------------------------------------------------------------------------------------------------------------------------------------------------------------------------------------------------------------------------------------------------------------------------------------------------------------------------------------------------------------------------------------------------------------------------------------------------------------------------------------------------------------------------------------------------------------------------------------------------------------------------------------------------------------------------------------------------------------------------------------------------------------------------------------------------------------------------------------------------------------------------------------------------------------------------------------------------------------------------------------------------------------------------------------------------------------------------------------------------------------------------------------------------------------------------------------------------------------------------------------------------------------------------------------------------------------------------------------------------------------------------------------------------------------------------------------------------------------------------------------------------------------------------------------------|--------------------------------------------------------------------------------------------------------------------------------------------------------------------------------------------------------------------------------------------------------------------------------------------------------------------------------------------------------------------------------------------------------------------------------------------------------------------------------------------------------------------------------------------------------------------------------------------------------------------------------------------------------------------------------------------------------------------------------------------------------------------------------------------------------------------------------------------------------------------------------------------------------------------------------------------------------------------------------------------------------------------------------------------------------------------------------------------------------------------------------------------------------------------------------------------------------------------------------------------------|
|  |  |  |  | <p>4); old danube (66.46, 1.0E-4); one-year survey (66.46, 1.0E-4); silver nanoparticle synthesis route (62.28, 1.0E-4); comparative life cycle assessment (62.28, 1.0E-4); sequential studies (58.12, 1.0E-4); laundry detergent solution (58.12, 1.0E-4); silver nanoparticle (57.89, 1.0E-4); zno nanoparticle (56.98, 1.0E-4); environmental fate modeling (53.97, 1.0E-4); surface water system (52.98, 1.0E-4); natural organic matter (52.29, 1.0E-4); water chemistry (50.23, 1.0E-4); chemical composition (48.78, 1.0E-4); ecotoxicological test media (48.78, 1.0E-4); aggregation status (48.78, 1.0E-4); multi-walled carbon nanotube (47.74, 1.0E-4); ceo2 nanoparticle (46.24, 1.0E-4); methane production (45.17, 1.0E-4); physical characterization (44.61, 1.0E-4); porous media (42.52, 1.0E-4); synthetic seawater (41.12, 1.0E-4); natural freshwater (41.12, 1.0E-4); graphene oxide (40.15, 1.0E-4); engineered nanomaterial (38.71, 1.0E-4); solution chemistry (38.42, 1.0E-4); toxicity effect (38.13, 1.0E-4); earthworm eisenia fetida (37.42, 1.0E-4); phosphate buffer (36.55, 1.0E-4); species sensitivity distribution (36.36, 1.0E-4); single-walled carbon nanotube (34.78, 1.0E-4); silver ion (34.41, 1.0E-4); zinc oxide nanoparticle (33.99, 1.0E-4); nanofate model (32.29, 1.0E-4); life cycle assessment studies (31.98, 1.0E-4); aqueous solution (30.21, 1.0E-4); aquatic environment (29.8, 1.0E-4); aqueous media (29.17, 1.0E-4); sewerage network (27.41, 1.0E-4); divalent electrolyte (26.97, 1.0E-4); multiwalled carbon nanotube (24.57, 1.0E-4); citrate-coated silver nanoparticle (24.3, 1.0E-4); coordinating modeling (22.87, 1.0E-4); daphnia magna (22.86, 1.0E-4); indoor nanomaterial emission</p> | <p>(0.61); soil mixture (0.61); pilot wastewater treatment plant (0.61); charge neutralization (0.61); electrochemical capacitive energy storage (0.61); coaxial array (0.61); multi-angle light scattering (0.61); methyl violet (0.61); field-flow fractionation (0.61); asymmetrical flow (0.61); comparative phototoxicity (0.61); electrolyte species (0.61); commercial tio2 nanoparticle (0.61); field study (0.58); agcl nanoparticle (0.58); sewer system (0.58); characterization factor (0.58); seventeen subcontinental freshwater (0.58); sorption behavior (0.58); natural soil system (0.58); green algae (0.58); microwave-induced carbon nanotube (0.58); ceriodaphnia dubia (0.58); urban soil (0.58); using different reducing agent (0.58); dunaliella tertiolecta (0.58); mediating c-60 phototransformation (0.58); chlorella vulgaris (0.58); surface complexation modeling (0.58); screening evaluation (0.58); methodological consideration (0.58); inhibitory effect (0.58); vitro test (0.58); tetrahymena thermophila (0.58); nanoscale metal oxide (0.58); synergistic toxic effect (0.58); reduced graphene oxide material (0.58); polyaromatic hydrocarbon (0.58); direct feeding (0.58); bacterial community</p> |
|--|--|--|--|----------------------------------------------------------------------------------------------------------------------------------------------------------------------------------------------------------------------------------------------------------------------------------------------------------------------------------------------------------------------------------------------------------------------------------------------------------------------------------------------------------------------------------------------------------------------------------------------------------------------------------------------------------------------------------------------------------------------------------------------------------------------------------------------------------------------------------------------------------------------------------------------------------------------------------------------------------------------------------------------------------------------------------------------------------------------------------------------------------------------------------------------------------------------------------------------------------------------------------------------------------------------------------------------------------------------------------------------------------------------------------------------------------------------------------------------------------------------------------------------------------------------------------------------------------------------------------------------------------------------------------------------------------------------------------------------------------------------------------------------------------------|--------------------------------------------------------------------------------------------------------------------------------------------------------------------------------------------------------------------------------------------------------------------------------------------------------------------------------------------------------------------------------------------------------------------------------------------------------------------------------------------------------------------------------------------------------------------------------------------------------------------------------------------------------------------------------------------------------------------------------------------------------------------------------------------------------------------------------------------------------------------------------------------------------------------------------------------------------------------------------------------------------------------------------------------------------------------------------------------------------------------------------------------------------------------------------------------------------------------------------------------------|

|   |    |       |      |                                                                                                                                                                                                                                                                                                 |                                                                                                                                                                                                                                                                                                                                                                                                                                                                                                                                                                                                                                                                                                                                                                                                                                                                                                                                                                                                                                                                                                                                                                                                                                                                                  |                                                                                                                                                                                                                                                                                                                                                                                                                                                                                                                                                                                                                                                                                                                                                                                                                                                                                                                     |
|---|----|-------|------|-------------------------------------------------------------------------------------------------------------------------------------------------------------------------------------------------------------------------------------------------------------------------------------------------|----------------------------------------------------------------------------------------------------------------------------------------------------------------------------------------------------------------------------------------------------------------------------------------------------------------------------------------------------------------------------------------------------------------------------------------------------------------------------------------------------------------------------------------------------------------------------------------------------------------------------------------------------------------------------------------------------------------------------------------------------------------------------------------------------------------------------------------------------------------------------------------------------------------------------------------------------------------------------------------------------------------------------------------------------------------------------------------------------------------------------------------------------------------------------------------------------------------------------------------------------------------------------------|---------------------------------------------------------------------------------------------------------------------------------------------------------------------------------------------------------------------------------------------------------------------------------------------------------------------------------------------------------------------------------------------------------------------------------------------------------------------------------------------------------------------------------------------------------------------------------------------------------------------------------------------------------------------------------------------------------------------------------------------------------------------------------------------------------------------------------------------------------------------------------------------------------------------|
|   |    |       |      |                                                                                                                                                                                                                                                                                                 | (22.84, 1.0E-4); human health characterization factor (22.84, 1.0E-4); fullerene nanoparticle (22.21, 1.0E-4); inorganic nanoparticle (19.98, 1.0E-4)                                                                                                                                                                                                                                                                                                                                                                                                                                                                                                                                                                                                                                                                                                                                                                                                                                                                                                                                                                                                                                                                                                                            | structure (0.58); different release scenario (0.58); indoor nanomaterial emission (0.56); human health characterization factor (0.56); wavelength dependency (0.56); sativus 1 (0.56); diesel soot (0.56); part 2-toxicity (0.56); product characterization (0.56); anatase nanoparticle (0.56)                                                                                                                                                                                                                                                                                                                                                                                                                                                                                                                                                                                                                     |
| 4 | 23 | 0.951 | 2007 | nanoparticles; impacts; wastewater sludge; evidence; wastewater; gills; toxicological response; mytilus galloprovincialis; cadmium; tio2 nanoparticles   effects; oxidative damage; bulk counterparts; oxidative stress; zebrafish; marine bivalve m; bulk zno; depuration; gills; human health | interactive effect (144.89, 1.0E-4); case studies (133.82, 1.0E-4); larval zebrafish (125.49, 1.0E-4); behavioral effect (125.49, 1.0E-4); c-60 nanoparticle exposure (119.04, 1.0E-4); lumbricus rubellus (119.04, 1.0E-4); population dynamics (119.04, 1.0E-4); other contaminant (112.61, 1.0E-4); physiological effect (106.18, 1.0E-4); rainbow trout hepatocyte (99.77, 1.0E-4); zns nanocrystal (93.37, 1.0E-4); photosynthetic pigment content (86.99, 1.0E-4); distilled water (80.63, 1.0E-4); particle dissolution (80.63, 1.0E-4); comparative toxicity (80.63, 1.0E-4); bulk zno suspension (80.63, 1.0E-4); danio rerio (79.79, 1.0E-4); aquatic organism (79.66, 1.0E-4); titanium dioxide (76.42, 1.0E-4); scenedesmus obliquus (75.82, 1.0E-4); acute toxicity (75.7, 1.0E-4); capping agent (74.28, 1.0E-4); human health (72.68, 1.0E-4); worsts case condition (67.96, 1.0E-4); conceptual modeling (67.96, 1.0E-4); using nzvi (67.96, 1.0E-4); mytilus galloprovincialis (66.06, 1.0E-4); toxicological response (66.06, 1.0E-4); available data (65.87, 1.0E-4); carbon nanomaterial fullerene (59.45, 1.0E-4); antioxidant responses (59.45, 1.0E-4); titanium dioxide nanoparticle (57.59, 1.0E-4); zebrafish embryo (52.83, 1.0E-4); metal ion (46.4, | bulk counterpart (0.22); nano-scale tio2 (0.22); semi-analytical model (0.22); low-temperature wgs reaction (0.22); nico2 catalyst (0.22); plasma mass spectrometry (0.22); fullerene df-1 (0.22); rgo core-shell nanocomposite (0.22); ion release kinetics (0.22); promoter effect (0.22); respiratory deposition (0.22); biological tissue (0.22); graphene-supported ni (0.22); radiosensitive mammalian cell (0.22); nonmonotonic retention (0.22); phytoremediation system (0.22); triazine-based pollutant (0.22); combined effect (0.22); using single particle (0.22); polyvinylpyrrolidone-coated silver nanoparticle (0.22); one-step approach (0.22); potential toxicity (0.2); juvenile carp (0.2); silver sulfide nanomaterial (0.2); bacterial tactic response (0.2); amino modification (0.2); magna straus (0.2); physiochemical properties (0.2); electrochemical filter (0.2); siberian sturgeon |

|  |  |  |  |                                                                                                                                                                                                                                                                                                                                                                                                                                                                                                                                                                                                                                                                                                                                                                                                                                                                                                                                                                                                                                                                                                                                                                                                                                                                                                                                                                                                                                                                                                                                                                                                                                                                                                                                                                     |                                                                                                                                                                                                                                                                                                                                                                                                                                                                                                                                                                                                                                                                                                                                                                                                                                                                                                                                                                                                                                                                                                                                                                                                                                                                         |
|--|--|--|--|---------------------------------------------------------------------------------------------------------------------------------------------------------------------------------------------------------------------------------------------------------------------------------------------------------------------------------------------------------------------------------------------------------------------------------------------------------------------------------------------------------------------------------------------------------------------------------------------------------------------------------------------------------------------------------------------------------------------------------------------------------------------------------------------------------------------------------------------------------------------------------------------------------------------------------------------------------------------------------------------------------------------------------------------------------------------------------------------------------------------------------------------------------------------------------------------------------------------------------------------------------------------------------------------------------------------------------------------------------------------------------------------------------------------------------------------------------------------------------------------------------------------------------------------------------------------------------------------------------------------------------------------------------------------------------------------------------------------------------------------------------------------|-------------------------------------------------------------------------------------------------------------------------------------------------------------------------------------------------------------------------------------------------------------------------------------------------------------------------------------------------------------------------------------------------------------------------------------------------------------------------------------------------------------------------------------------------------------------------------------------------------------------------------------------------------------------------------------------------------------------------------------------------------------------------------------------------------------------------------------------------------------------------------------------------------------------------------------------------------------------------------------------------------------------------------------------------------------------------------------------------------------------------------------------------------------------------------------------------------------------------------------------------------------------------|
|  |  |  |  | <p>1.0E-4); nanoparticle characterisation (46.22, 1.0E-4); phagocytic activity (46.22, 1.0E-4); vitro exposure (46.22, 1.0E-4); silica nanoparticle (41.75, 1.0E-4); first exposure (39.62, 1.0E-4); embryonal development (39.62, 1.0E-4); mediterranean sea urchin (39.62, 1.0E-4); biomarker responses (33.01, 1.0E-4); marine bivalve m (33.01, 1.0E-4); graphene oxide (30.38, 1.0E-4); gene expression (28.81, 1.0E-4); ceriodaphnia dubia (26.4, 1.0E-4); synergistic toxic effect (26.4, 1.0E-4); environmental risk assessment (23.2, 1.0E-4); illumination mode (19.8, 1.0E-4); bulk zno (19.8, 1.0E-4); free-living nematode caenorhabditis elegans (19.8, 1.0E-4); comparative phototoxicity (19.8, 1.0E-4); multi-walled carbon nanotube (16.69, 1.0E-4); carbon nanotube (15.1, 0.001); potential toxicity (13.2, 0.001); juvenile carp (13.2, 0.001); wastewater treatment (12.37, 0.001); zinc oxide nanoparticle (11.7, 0.001); aqueous solution (10.56, 0.005); natural water (10.03, 0.005); engineered nanoparticle (8.04, 0.005); graphene oxide nanomaterial (7.76, 0.01); gold nanoparticle (7.38, 0.01); single-walled carbon nanotube (7.25, 0.01); bulk counterpart (6.6, 0.05); nano-scale tio2 (6.6, 0.05); water purification (5.87, 0.05); silver ion (5.57, 0.05); organic matter (4.89, 0.05); coated silver nanoparticle (4.89, 0.05); earthworm eisenia fetida (4.89, 0.05); solution chemistry (4.68, 0.05); plant species (4.52, 0.05); theoretical studies (4.44, 0.05); preparation method (4.39, 0.05); japanese medaka embryo (4.39, 0.05); fullerene water suspension (4.39, 0.05); multiwalled carbon nanotube (4.37, 0.05); carbon nanomaterial (4.37, 0.05); porous media (4.3, 0.05); suwannee river (4.14, 0.05);</p> | <p>(0.2); test media (0.2); nitrogen-fixing bacteria (0.2); oxide-based nanomaterial (0.2); common aqueous antibiotic tetracycline (0.2); cnt size (0.2); organic carbon (0.2); aquatic chemistry (0.2); illumination mode (0.18); bulk zno (0.18); free-living nematode caenorhabditis elegans (0.18); comparative phototoxicity (0.18); histopathological effect (0.18); bone marrow cell (0.18); colloidal sio2 (0.18); double-layer compression (0.18); sludge digestion (0.18); environmental effect (0.18); swiss-webster mice (0.18); size characterization (0.18); containing waste incineration residue (0.18); titanium nitride nanotube (0.18); polymer-stabilised nanoparticle (0.18); soil mixture (0.18); pilot wastewater treatment plant (0.18); charge neutralization (0.18); electrochemical capacitive energy storage (0.18); coaxial array (0.18); multi-angle light scattering (0.18); methyl violet (0.18); field-flow fractionation (0.18); asymmetrical flow (0.18); electrolyte species (0.18); commercial tio2 nanoparticle (0.18); explicit fate modelling (0.18); ceriodaphnia dubia (0.17); synergistic toxic effect (0.17); nanoscale metal oxide (0.17); characterization factor (0.17); seventeen subcontinental freshwater (0.17);</p> |
|--|--|--|--|---------------------------------------------------------------------------------------------------------------------------------------------------------------------------------------------------------------------------------------------------------------------------------------------------------------------------------------------------------------------------------------------------------------------------------------------------------------------------------------------------------------------------------------------------------------------------------------------------------------------------------------------------------------------------------------------------------------------------------------------------------------------------------------------------------------------------------------------------------------------------------------------------------------------------------------------------------------------------------------------------------------------------------------------------------------------------------------------------------------------------------------------------------------------------------------------------------------------------------------------------------------------------------------------------------------------------------------------------------------------------------------------------------------------------------------------------------------------------------------------------------------------------------------------------------------------------------------------------------------------------------------------------------------------------------------------------------------------------------------------------------------------|-------------------------------------------------------------------------------------------------------------------------------------------------------------------------------------------------------------------------------------------------------------------------------------------------------------------------------------------------------------------------------------------------------------------------------------------------------------------------------------------------------------------------------------------------------------------------------------------------------------------------------------------------------------------------------------------------------------------------------------------------------------------------------------------------------------------------------------------------------------------------------------------------------------------------------------------------------------------------------------------------------------------------------------------------------------------------------------------------------------------------------------------------------------------------------------------------------------------------------------------------------------------------|



|   |    |       |      |                                                                                                                                |                                                                                                                                                                                                                                                                                                                                                                                                                                                                                                                                                                                                                                                  |                                                                                                                                                                                                                                                                                                                                                                                                                                                                                                                                                                                                                                                                                                                                                                                                                                                                                                                                                                                         |
|---|----|-------|------|--------------------------------------------------------------------------------------------------------------------------------|--------------------------------------------------------------------------------------------------------------------------------------------------------------------------------------------------------------------------------------------------------------------------------------------------------------------------------------------------------------------------------------------------------------------------------------------------------------------------------------------------------------------------------------------------------------------------------------------------------------------------------------------------|-----------------------------------------------------------------------------------------------------------------------------------------------------------------------------------------------------------------------------------------------------------------------------------------------------------------------------------------------------------------------------------------------------------------------------------------------------------------------------------------------------------------------------------------------------------------------------------------------------------------------------------------------------------------------------------------------------------------------------------------------------------------------------------------------------------------------------------------------------------------------------------------------------------------------------------------------------------------------------------------|
|   |    |       |      |                                                                                                                                | <p>graphene oxide nanoparticle (4.06, 0.05); comparative study (4.06, 0.05); modeling technique (4.06, 0.05); chemical transformation (3.99, 0.05); toxicity effect (3.84, 0.1); cucurbita pepo (3.84, 0.1); bacillus subtilis (3.54, 0.1); cerium uptake (3.46, 0.1); surface properties (3.46, 0.1); raphanus sativus (3.46, 0.1); escherichia coli (3.46, 0.1); citric acid (3.46, 0.1); commercial ceo2 nanoparticle (3.46, 0.1); developmental responses (3.39, 0.1); single walled carbon nanotube (3.39, 0.1); environmental fate (3.39, 0.1); stream dynamics (3.39, 0.1); watershed-scale model (3.39, 0.1); crop plant (3.39, 0.1)</p> | <p>sorption behavior (0.17); field study (0.17); natural soil system (0.17); green algae (0.17); microwave-induced carbon nanotube (0.17); agcl nanoparticle (0.17); urban soil (0.17); using different reducing agent (0.17); dunaliella tertiolecta (0.17); mediating c-60 phototransformation (0.17); chlorella vulgaris (0.17); surface complexation modeling (0.17); screening evaluation (0.17); methodological consideration (0.17); sewer system (0.17); inhibitory effect (0.17); vitro test (0.17); tetrahymena thermophila (0.17); reduced graphene oxide material (0.17); polyaromatic hydrocarbon (0.17); direct feeding (0.17); bacterial community structure (0.17); different release scenario (0.17); biomarker responses (0.16); marine bivalve m (0.16); marine invertebrate (0.16); bivalve mollusc scrobicularia plana (0.16); metal-based nanoparticle (0.16); annelid polychaete hediste diversicolor (0.16); wavelength dependency (0.16); sativus l (0.16)</p> |
| 5 | 22 | 0.987 | 2008 | <p>aggregation; competing similarly-charged inorganic ions; charge behavior; nonmetallic nanoparticles; exposure modeling;</p> | <p>nanoparticle aggregation (189.78, 1.0E-4); understanding transport (114.14, 1.0E-4); natural aqueous matrice (107.63, 1.0E-4); silver nanoparticles suspension (101.14, 1.0E-4); electrolyte type (97.09, 1.0E-4); microstructural transformation</p>                                                                                                                                                                                                                                                                                                                                                                                         | <p>combined effect (0.21); semi-analytical model (0.21); low-temperature wgs reaction (0.21); ni-ceo2 catalyst (0.21); bulk counterpart (0.21); plasma mass spectrometry (0.21); fullerene df-1 (0.21);</p>                                                                                                                                                                                                                                                                                                                                                                                                                                                                                                                                                                                                                                                                                                                                                                             |

|                                                                                                                                                                                                                                                                                                                                                    |                                                                                                                                                                                                                                                                                                                                                                                                                                                                                                                                                                                                                                                                                                                                                                                                                                                                                                                                                                                                                                                                                                                                                                                                                                                                                                                                                                                                                                                                                                                                                                                                                                                                                                                                                                                                                                                                                         |                                                                                                                                                                                                                                                                                                                                                                                                                                                                                                                                                                                                                                                                                                                                                                                                                                                                                                                                                                                                                                                                                                                                                                                                                                                                                                                                                                                       |
|----------------------------------------------------------------------------------------------------------------------------------------------------------------------------------------------------------------------------------------------------------------------------------------------------------------------------------------------------|-----------------------------------------------------------------------------------------------------------------------------------------------------------------------------------------------------------------------------------------------------------------------------------------------------------------------------------------------------------------------------------------------------------------------------------------------------------------------------------------------------------------------------------------------------------------------------------------------------------------------------------------------------------------------------------------------------------------------------------------------------------------------------------------------------------------------------------------------------------------------------------------------------------------------------------------------------------------------------------------------------------------------------------------------------------------------------------------------------------------------------------------------------------------------------------------------------------------------------------------------------------------------------------------------------------------------------------------------------------------------------------------------------------------------------------------------------------------------------------------------------------------------------------------------------------------------------------------------------------------------------------------------------------------------------------------------------------------------------------------------------------------------------------------------------------------------------------------------------------------------------------------|---------------------------------------------------------------------------------------------------------------------------------------------------------------------------------------------------------------------------------------------------------------------------------------------------------------------------------------------------------------------------------------------------------------------------------------------------------------------------------------------------------------------------------------------------------------------------------------------------------------------------------------------------------------------------------------------------------------------------------------------------------------------------------------------------------------------------------------------------------------------------------------------------------------------------------------------------------------------------------------------------------------------------------------------------------------------------------------------------------------------------------------------------------------------------------------------------------------------------------------------------------------------------------------------------------------------------------------------------------------------------------------|
| modeling;<br>lagrangian<br>approach;<br>determining<br>environmental<br>impacts;<br>nanoparticles;<br>presence   role;<br>zno nanoparticles;<br>aggregation<br>kinetics;<br>morphology;<br>stability; natural<br>aqueous matrices;<br>metal oxide<br>nanoparticles;<br>combined effects;<br>heterotrophic<br>wastewater<br>biomass;<br>biosorption | (93.67, 1.0E-4); haliotis<br>diversicolor supertexta (92.97,<br>1.0E-4); lagrangian approach<br>(86.96, 1.0E-4); early life stage<br>(73.57, 1.0E-4); japanese<br>medaka (73.57, 1.0E-4);<br>titanium dioxide nanopowder<br>(73.57, 1.0E-4); environmental<br>condition (69.21, 1.0E-4);<br>silicon nanoparticle (66.87,<br>1.0E-4); surface charge (66.58,<br>1.0E-4); ionic strength (57.43,<br>1.0E-4); aquatic organism<br>(55.92, 1.0E-4); binary system<br>(53.75, 1.0E-4); nanoparticle<br>agglomeration (53.48, 1.0E-4);<br>manufactured nanoparticle<br>(51.39, 1.0E-4); common<br>groundwater (46.79, 1.0E-4);<br>zerovalent iron nanoparticle<br>(46.79, 1.0E-4); marine<br>environment (46.75, 1.0E-4);<br>oryzias latipe (37.26, 1.0E-4);<br>tio2 nanomaterial (33.41, 1.0E-<br>4); full scale wastewater<br>treatment plant (33.41, 1.0E-4);<br>metal oxide nanoparticle (32.03,<br>1.0E-4); graphene oxide (29.15,<br>1.0E-4); zno nanoparticle<br>(24.86, 1.0E-4); cuo<br>nanoparticle (23.28, 1.0E-4);<br>aqueous media (22.59, 1.0E-4);<br>tio2 nanoparticle (20.81, 1.0E-<br>4); suwannee river (20.59, 1.0E-<br>4); double-layer compression<br>(20.04, 1.0E-4); charge<br>neutralization (20.04, 1.0E-4);<br>commercial tio2 nanoparticle<br>(20.04, 1.0E-4); fulvic acid<br>(19.74, 1.0E-4); carbon<br>nanotube (18.56, 1.0E-4); humic<br>acid (17.33, 1.0E-4);<br>comparative study (17.3, 1.0E-<br>4); aqueous suspension (13.4,<br>0.001); engineered nanoparticle<br>(13.19, 0.001); aqueous solution<br>(10.13, 0.005); exposure<br>modeling (9.82, 0.005);<br>aggregation kinetics (8.88,<br>0.005); chemical transformation<br>(8.11, 0.005); graphene oxide<br>nanomaterial (7.45, 0.01);<br>porous media (7.16, 0.01);<br>multiwalled carbon nanotube<br>(6.95, 0.01); combined effect<br>(6.68, 0.01); multi-walled<br>carbon nanotube (6.57, 0.05); c- | rgo core-shell<br>nanocomposite (0.21);<br>ion release kinetics<br>(0.21); promoter effect<br>(0.21); respiratory<br>deposition (0.21);<br>biological tissue (0.21);<br>graphene-supported ni<br>(0.21); radiosensitive<br>mammalian cell (0.21);<br>nonmonotonic retention<br>(0.21);<br>phytoremediation<br>system (0.21); triazine-<br>based pollutant (0.21);<br>using single particle<br>(0.21);<br>polyvinylpyrrolidone-<br>coated silver<br>nanoparticle (0.21);<br>one-step approach<br>(0.21); nano-scale tio2<br>(0.21); silver sulfide<br>nanomaterial (0.19);<br>bacterial tactic response<br>(0.19); amino<br>modification (0.19);<br>magna straus (0.19);<br>physiochemical<br>properties (0.19);<br>electrochemical filter<br>(0.19); siberian<br>sturgeon (0.19); test<br>media (0.19); nitrogen-<br>fixing bacteria (0.19);<br>potential toxicity (0.19);<br>oxide-based<br>nanomaterial (0.19);<br>common aqueous<br>antibiotic tetracycline<br>(0.19); juvenile carp<br>(0.19); cnt size (0.19);<br>organic carbon (0.19);<br>aquatic chemistry<br>(0.19); double-layer<br>compression (0.17);<br>charge neutralization<br>(0.17); commercial tio2<br>nanoparticle (0.17);<br>bone marrow cell<br>(0.17); colloidal sio2<br>(0.17); illumination<br>mode (0.17); sludge<br>digestion (0.17);<br>environmental effect<br>(0.17); swiss-webster<br>mice (0.17); size |
|----------------------------------------------------------------------------------------------------------------------------------------------------------------------------------------------------------------------------------------------------------------------------------------------------------------------------------------------------|-----------------------------------------------------------------------------------------------------------------------------------------------------------------------------------------------------------------------------------------------------------------------------------------------------------------------------------------------------------------------------------------------------------------------------------------------------------------------------------------------------------------------------------------------------------------------------------------------------------------------------------------------------------------------------------------------------------------------------------------------------------------------------------------------------------------------------------------------------------------------------------------------------------------------------------------------------------------------------------------------------------------------------------------------------------------------------------------------------------------------------------------------------------------------------------------------------------------------------------------------------------------------------------------------------------------------------------------------------------------------------------------------------------------------------------------------------------------------------------------------------------------------------------------------------------------------------------------------------------------------------------------------------------------------------------------------------------------------------------------------------------------------------------------------------------------------------------------------------------------------------------------|---------------------------------------------------------------------------------------------------------------------------------------------------------------------------------------------------------------------------------------------------------------------------------------------------------------------------------------------------------------------------------------------------------------------------------------------------------------------------------------------------------------------------------------------------------------------------------------------------------------------------------------------------------------------------------------------------------------------------------------------------------------------------------------------------------------------------------------------------------------------------------------------------------------------------------------------------------------------------------------------------------------------------------------------------------------------------------------------------------------------------------------------------------------------------------------------------------------------------------------------------------------------------------------------------------------------------------------------------------------------------------------|

|                                                                                                                                                                                                                                                                                                                                                                                                                                                                                                                                                                                                                                                                                                                                                                                                                                                                                                                                                                                                                                                                                                                                                                                                                                                                                                                                                                                                                                                                                                                                                                                                                                                                                       |                                                                                                                                                                                                                                                                                                                                                                                                                                                                                                                                                                                                                                                                                                                                                                                                                                                                                                                                                                                                                                                                                                                                                                                                               |
|---------------------------------------------------------------------------------------------------------------------------------------------------------------------------------------------------------------------------------------------------------------------------------------------------------------------------------------------------------------------------------------------------------------------------------------------------------------------------------------------------------------------------------------------------------------------------------------------------------------------------------------------------------------------------------------------------------------------------------------------------------------------------------------------------------------------------------------------------------------------------------------------------------------------------------------------------------------------------------------------------------------------------------------------------------------------------------------------------------------------------------------------------------------------------------------------------------------------------------------------------------------------------------------------------------------------------------------------------------------------------------------------------------------------------------------------------------------------------------------------------------------------------------------------------------------------------------------------------------------------------------------------------------------------------------------|---------------------------------------------------------------------------------------------------------------------------------------------------------------------------------------------------------------------------------------------------------------------------------------------------------------------------------------------------------------------------------------------------------------------------------------------------------------------------------------------------------------------------------------------------------------------------------------------------------------------------------------------------------------------------------------------------------------------------------------------------------------------------------------------------------------------------------------------------------------------------------------------------------------------------------------------------------------------------------------------------------------------------------------------------------------------------------------------------------------------------------------------------------------------------------------------------------------|
| <p>60 fullerene (5.93, 0.05); water purification (5.64, 0.05); silver ion (5.35, 0.05); zinc oxide (4.89, 0.05); silver nanoparticle (4.72, 0.05); metal ion (4.41, 0.05); plant species (4.34, 0.05); theoretical studies (4.26, 0.05); carbon nanomaterial (4.19, 0.05); environmental risk assessment (4.05, 0.05); graphene oxide nanoparticle (3.9, 0.05); algal toxicity (3.9, 0.05); modeling technique (3.9, 0.05); toxicity effect (3.68, 0.1); cucurbita pepo (3.68, 0.1); wastewater treatment (3.61, 0.1); physico-chemical behavior (3.47, 0.1); water chemistry (3.47, 0.1); cerium uptake (3.32, 0.1); surface properties (3.32, 0.1); raphanus sativus (3.32, 0.1); citric acid (3.32, 0.1); commercial ceo2 nanoparticle (3.32, 0.1); vitro cytotoxicity (3.28, 0.1); using catfish (3.28, 0.1); developmental responses (3.25, 0.1); environmental fate (3.25, 0.1); stream dynamics (3.25, 0.1); watershed-scale model (3.25, 0.1); crop plant (3.25, 0.1); zinc oxide nanoparticle (3.18, 0.1); cerium oxide (3.18, 0.1); arabidopsis thaliana seedling (3.18, 0.1); methane production (3.18, 0.1); arabidopsis thaliana gene expression (3.11, 0.1); carbon dot (3.11, 0.1); non-labile silver species (3.11, 0.1); nutrient status (3.11, 0.1); human hepg2 cell (3.1, 0.1); using allium cepa (3.1, 0.1); ag nanoparticle exposure (3.03, 0.1); mesoporous carbon (3.03, 0.1); spatio-temporal approach (2.96, 0.1); dde bioaccumulation (2.96, 0.1); catalytic degradation (2.96, 0.1); probabilistic modelling (2.96, 0.1); glycine max (2.96, 0.1); zn ion exposure (2.96, 0.1); soil column (2.96, 0.1); engineered nanomaterial emission (2.96, 0.1)</p> | <p>characterization (0.17); containing waste incineration residue (0.17); histopathological effect (0.17); bulk zno (0.17); titanium nitride nanotube (0.17); free-living nematode caenorhabditis elegans (0.17); polymer-stabilised nanoparticle (0.17); soil mixture (0.17); pilot wastewater treatment plant (0.17); electrochemical capacitive energy storage (0.17); coaxial array (0.17); multi-angle light scattering (0.17); methyl violet (0.17); field-flow fractionation (0.17); asymmetrical flow (0.17); comparative phototoxicity (0.17); electrolyte species (0.17); explicit fate modelling (0.17); bacterial community structure (0.16); characterization factor (0.16); seventeen subcontinental freshwater (0.16); sorption behavior (0.16); field study (0.16); natural soil system (0.16); green algae (0.16); microwave-induced carbon nanotube (0.16); agcl nanoparticle (0.16); ceriodaphnia dubia (0.16); urban soil (0.16); using different reducing agent (0.16); dunaliella tertiolecta (0.16); mediating c-60 phototransformation (0.16); chlorella vulgaris (0.16); surface complexation modeling (0.16); screening evaluation (0.16); methodological consideration (0.16);</p> |
|---------------------------------------------------------------------------------------------------------------------------------------------------------------------------------------------------------------------------------------------------------------------------------------------------------------------------------------------------------------------------------------------------------------------------------------------------------------------------------------------------------------------------------------------------------------------------------------------------------------------------------------------------------------------------------------------------------------------------------------------------------------------------------------------------------------------------------------------------------------------------------------------------------------------------------------------------------------------------------------------------------------------------------------------------------------------------------------------------------------------------------------------------------------------------------------------------------------------------------------------------------------------------------------------------------------------------------------------------------------------------------------------------------------------------------------------------------------------------------------------------------------------------------------------------------------------------------------------------------------------------------------------------------------------------------------|---------------------------------------------------------------------------------------------------------------------------------------------------------------------------------------------------------------------------------------------------------------------------------------------------------------------------------------------------------------------------------------------------------------------------------------------------------------------------------------------------------------------------------------------------------------------------------------------------------------------------------------------------------------------------------------------------------------------------------------------------------------------------------------------------------------------------------------------------------------------------------------------------------------------------------------------------------------------------------------------------------------------------------------------------------------------------------------------------------------------------------------------------------------------------------------------------------------|

|   |    |       |      |                                                                                                                                                                                                                                                                                                                                                                                                                                                                                   |                                                                                                                                                                                                                                                                                                                                                                                                                                                                                                                                                                                                                                                                                                                                                                                                                                                                                                                                                                                                      |                                                                                                                                                                                                                                                                                                                                                                                                                                                                                                                                                                                                                                                                                                                                                                                                           |
|---|----|-------|------|-----------------------------------------------------------------------------------------------------------------------------------------------------------------------------------------------------------------------------------------------------------------------------------------------------------------------------------------------------------------------------------------------------------------------------------------------------------------------------------|------------------------------------------------------------------------------------------------------------------------------------------------------------------------------------------------------------------------------------------------------------------------------------------------------------------------------------------------------------------------------------------------------------------------------------------------------------------------------------------------------------------------------------------------------------------------------------------------------------------------------------------------------------------------------------------------------------------------------------------------------------------------------------------------------------------------------------------------------------------------------------------------------------------------------------------------------------------------------------------------------|-----------------------------------------------------------------------------------------------------------------------------------------------------------------------------------------------------------------------------------------------------------------------------------------------------------------------------------------------------------------------------------------------------------------------------------------------------------------------------------------------------------------------------------------------------------------------------------------------------------------------------------------------------------------------------------------------------------------------------------------------------------------------------------------------------------|
|   |    |       |      |                                                                                                                                                                                                                                                                                                                                                                                                                                                                                   |                                                                                                                                                                                                                                                                                                                                                                                                                                                                                                                                                                                                                                                                                                                                                                                                                                                                                                                                                                                                      | sewer system (0.16);<br>inhibitory effect (0.16);<br>vitro test (0.16);<br>tetrahymena<br>thermophila (0.16);<br>nanoscale metal oxide<br>(0.16); synergistic toxic<br>effect (0.16); reduced<br>graphene oxide material<br>(0.16); polyaromatic<br>hydrocarbon (0.16);<br>direct feeding (0.16);<br>different release<br>scenario (0.16); tio2<br>nanomaterial (0.16);<br>full scale wastewater<br>treatment plant (0.16);<br>geochemical reactivity<br>(0.16); single extraction<br>method (0.16); human<br>bioaccessibility (0.16);<br>wavelength dependency<br>(0.16); sativus 1 (0.16);<br>diesel soot (0.16)                                                                                                                                                                                        |
| 6 | 21 | 0.928 | 2006 | nanoparticles;<br>evidence;<br>wastewater;<br>impacts;<br>wastewater<br>sludge; product<br>characterization;<br>wavelength<br>dependency;<br>spectrometric<br>detection; high-<br>performance<br>liquid<br>chromatography;<br>dispersion  <br>transport; porous<br>media; biofilm;<br>influence;<br>heterotrophic<br>wastewater<br>biomass;<br>biosorption;<br>single-walled<br>carbon nanotubes;<br>non-covalent<br>functionalization;<br>nanotube<br>suspensions;<br>dispersant | c-60 derivative (160.55, 1.0E-4); preparation method (106.82, 1.0E-4); japanese medaka embryo (106.82, 1.0E-4); fullerene water suspension (106.82, 1.0E-4); uv irradiation (103.2, 1.0E-4); aqueous fullerene (103.2, 1.0E-4); c-60 nanoparticle (102.15, 1.0E-4); aqueous nc (96.13, 1.0E-4); characterizing photochemical transformation (96.13, 1.0E-4); water-stable c-60 cluster (95.93, 1.0E-4); humic acid (94.31, 1.0E-4); kinetic measurement (92.71, 1.0E-4); radical oxidation (92.47, 1.0E-4); aggregation state (91.09, 1.0E-4); electron reduction (89.4, 1.0E-4); aqueous suspension (76.47, 1.0E-4); escherichia coli inactivation (73.93, 1.0E-4); solvent extraction technique (70.86, 1.0E-4); quantitative determination (70.86, 1.0E-4); relevant condition (69.75, 1.0E-4); high performance liquid chromatography (67.82, 1.0E-4); reactive oxygen production (64.65, 1.0E-4); cosmetic product (61.75, 1.0E-4); fullerene detection (61.75, 1.0E-4); aqueous system (59.12, | fullerene df-1 (0.22);<br>radiosensitive<br>mammalian cell (0.22);<br>semi-analytical model<br>(0.22); low-temperature<br>wgs reaction (0.22); ni-<br>ceo2 catalyst (0.22);<br>bulk counterpart (0.22);<br>plasma mass<br>spectrometry (0.22); rgo<br>core-shell<br>nanocomposite (0.22);<br>ion release kinetics<br>(0.22); promoter effect<br>(0.22); respiratory<br>deposition (0.22);<br>biological tissue (0.22);<br>graphene-supported ni<br>(0.22); nonmonotonic<br>retention (0.22);<br>phytoremediation<br>system (0.22); triazine-<br>based pollutant (0.22);<br>combined effect (0.22);<br>using single particle<br>(0.22);<br>polyvinylpyrrolidone-<br>coated silver<br>nanoparticle (0.22);<br>one-step approach<br>(0.22); nano-scale tio2<br>(0.22); silver sulfide<br>nanomaterial (0.2); |

5

1.0E-4); potential new waste management paradigm (58.49, 1.0E-4); comparative photoactivity (49.73, 1.0E-4); antibacterial properties (49.73, 1.0E-4); acute pulmonary toxicity (43.81, 1.0E-4); coated silica surface (40.27, 1.0E-4); conventional drinking water treatment processes (34.32, 1.0E-4); silver nanoparticle (34.14, 1.0E-4); daphnia magna (31.67, 1.0E-4); organochlorine compound (30.84, 1.0E-4); negligible depletion solid-phase microextraction (30.84, 1.0E-4); delineating oxidative processes (24.85, 1.0E-4); thf peroxide (24.85, 1.0E-4); aqueous c-60 preparation (24.85, 1.0E-4); multiwall carbon nanotube (23.84, 1.0E-4); carbon nanotube (19.4, 1.0E-4); non-covalent functionalization (18.96, 1.0E-4); nanotube suspension (18.96, 1.0E-4); epigenetic toxicity (18.96, 1.0E-4); graphene oxide (18.21, 1.0E-4); mediating c-60 phototransformation (15.42, 1.0E-4); aqueous c-60 cluster (14.46, 0.001); engineered nanoparticle (13.65, 0.001); wastewater treatment (12.3, 0.001); oryzias latipe (12.23, 0.001); titanium dioxide (10.49, 0.005); aqueous solution (10.49, 0.005); tio2 nanoparticle (10.41, 0.005); c-60 fullerene (10.18, 0.005); bone marrow cell (9.48, 0.005); swiss-webster mice (9.48, 0.005); natural organic matter (8.22, 0.005); graphene oxide nanomaterial (7.71, 0.01); gold nanoparticle (7.34, 0.01); multi-walled carbon nanotube (7, 0.01); fullerene df-1 (6.61, 0.05); radiosensitive mammalian cell (6.61, 0.05); zinc oxide nanoparticle (6.25, 0.05); silver ion (5.54, 0.05); fullerene nanoparticle (5.16, 0.05); titanium dioxide nanoparticle (5.01, 0.05); transport behavior (4.99, 0.05); tube length (4.99, 0.05); water-saturated quartz sand (4.99, 1.0E-4); bacterial tactic response (0.2); amino modification (0.2); magna straus (0.2); physiochemical properties (0.2); electrochemical filter (0.2); siberian sturgeon (0.2); test media (0.2); nitrogen-fixing bacteria (0.2); potential toxicity (0.2); oxide-based nanomaterial (0.2); common aqueous antibiotic tetracycline (0.2); juvenile carp (0.2); cnt size (0.2); organic carbon (0.2); aquatic chemistry (0.2); bone marrow cell (0.18); swiss-webster mice (0.18); colloidal sio2 (0.18); double-layer compression (0.18); illumination mode (0.18); sludge digestion (0.18); environmental effect (0.18); size characterization (0.18); containing waste incineration residue (0.18); histopathological effect (0.18); bulk zno (0.18); titanium nitride nanotube (0.18); free-living nematode caenorhabditis elegan (0.18); polymer-stabilised nanoparticle (0.18); soil mixture (0.18); pilot wastewater treatment plant (0.18); charge neutralization (0.18); electrochemical capacitive energy storage (0.18); coaxial array (0.18); multi-angle light scattering (0.18); methyl violet (0.18); field-flow fractionation (0.18); asymmetrical flow (0.18); comparative phototoxicity (0.18); electrolyte species

|   |    |       |      |                    |                                                                                                                                                                                                                                                                                                                                                                                                                                                                                                                                                                                                                                                                                                                                                                                                                                                                                                                                                                                                                                                                                               |                                                                                                                                                                                                                                                                                                                                                                                                                                                                                                                                                                                                                                                                                                                                                                                                                                                                                                                                                                                                                                                                                                                                                                                                   |
|---|----|-------|------|--------------------|-----------------------------------------------------------------------------------------------------------------------------------------------------------------------------------------------------------------------------------------------------------------------------------------------------------------------------------------------------------------------------------------------------------------------------------------------------------------------------------------------------------------------------------------------------------------------------------------------------------------------------------------------------------------------------------------------------------------------------------------------------------------------------------------------------------------------------------------------------------------------------------------------------------------------------------------------------------------------------------------------------------------------------------------------------------------------------------------------|---------------------------------------------------------------------------------------------------------------------------------------------------------------------------------------------------------------------------------------------------------------------------------------------------------------------------------------------------------------------------------------------------------------------------------------------------------------------------------------------------------------------------------------------------------------------------------------------------------------------------------------------------------------------------------------------------------------------------------------------------------------------------------------------------------------------------------------------------------------------------------------------------------------------------------------------------------------------------------------------------------------------------------------------------------------------------------------------------------------------------------------------------------------------------------------------------|
|   |    |       |      |                    | 0.05); organic matter (4.86, 0.05); coated silver nanoparticle (4.86, 0.05); functionalized multi-wall carbon nanotube (4.82, 0.05); anaerobic digestion (4.71, 0.05); vadose zone (4.66, 0.05); metal ion (4.56, 0.05); plant species (4.49, 0.05); theoretical studies (4.41, 0.05); cuo nanoparticle (4.34, 0.05); carbon nanomaterial (4.34, 0.05); porous media (4.2, 0.05); environmental risk assessment (4.19, 0.05); suwannee river (4.12, 0.05); graphene oxide nanoparticle (4.04, 0.05); algal toxicity (4.04, 0.05); modeling technique (4.04, 0.05); chemical transformation (3.97, 0.05); toxicity effect (3.81, 0.1); cucurbita pepo (3.81, 0.1); microbial communities (3.74, 0.1); bacillus subtilis (3.51, 0.1); ionic strength (3.51, 0.1); cerium uptake (3.44, 0.1); surface properties (3.44, 0.1); raphanus sativus (3.44, 0.1); escherichia coli (3.44, 0.1); citric acid (3.44, 0.1); commercial ceo2 nanoparticle (3.44, 0.1); developmental responses (3.37, 0.1); environmental fate (3.37, 0.1); stream dynamics (3.37, 0.1); watershed-scale model (3.37, 0.1) | (0.18); commercial tio2 nanoparticle (0.18); explicit fate modelling (0.18); mediating c-60 phototransformation (0.17); urban soil (0.17); screening evaluation (0.17); vitro test (0.17); nanoscale metal oxide (0.17); bacterial community structure (0.17); characterization factor (0.17); seventeen subcontinental freshwater (0.17); sorption behavior (0.17); field study (0.17); natural soil system (0.17); green algae (0.17); microwave-induced carbon nanotube (0.17); agcl nanoparticle (0.17); ceriodaphnia dubia (0.17); using different reducing agent (0.17); dunaliella tertiolecta (0.17); chlorella vulgaris (0.17); surface complexation modeling (0.17); methodological consideration (0.17); sewer system (0.17); inhibitory effect (0.17); tetrahymena thermophila (0.17); synergistic toxic effect (0.17); reduced graphene oxide material (0.17); polyaromatic hydrocarbon (0.17); direct feeding (0.17); different release scenario (0.17); wavelength dependency (0.16); sativus l (0.16); product characterization (0.16); geochemical reactivity (0.16); single extraction method (0.16); human bioaccessibility (0.16); diesel soot (0.16); part 2-toxicity (0.16) |
| 7 | 20 | 0.932 | 2008 | transport; single- | porous media (527.16, 1.0E-4);                                                                                                                                                                                                                                                                                                                                                                                                                                                                                                                                                                                                                                                                                                                                                                                                                                                                                                                                                                                                                                                                | low-temperature wgs                                                                                                                                                                                                                                                                                                                                                                                                                                                                                                                                                                                                                                                                                                                                                                                                                                                                                                                                                                                                                                                                                                                                                                               |

|  |  |  |                                                                                                                                                                                                                                                                                                                                                                    |                                                                                                                                                                                                                                                                                                                                                                                                                                                                                                                                                                                                                                                                                                                                                                                                                                                                                                                                                                                                                                                                                                                                                                                                                                                                                                                                                                                                                                                                                                                                                                                                                                                                                                                                            |                                                                                                                                                                                                                                                                                                                                                                                                                                                                                                                                                                                                                                                                                                                                                                                                                                                                                                                                                                                                                                                                                                                                                                                                                     |
|--|--|--|--------------------------------------------------------------------------------------------------------------------------------------------------------------------------------------------------------------------------------------------------------------------------------------------------------------------------------------------------------------------|--------------------------------------------------------------------------------------------------------------------------------------------------------------------------------------------------------------------------------------------------------------------------------------------------------------------------------------------------------------------------------------------------------------------------------------------------------------------------------------------------------------------------------------------------------------------------------------------------------------------------------------------------------------------------------------------------------------------------------------------------------------------------------------------------------------------------------------------------------------------------------------------------------------------------------------------------------------------------------------------------------------------------------------------------------------------------------------------------------------------------------------------------------------------------------------------------------------------------------------------------------------------------------------------------------------------------------------------------------------------------------------------------------------------------------------------------------------------------------------------------------------------------------------------------------------------------------------------------------------------------------------------------------------------------------------------------------------------------------------------|---------------------------------------------------------------------------------------------------------------------------------------------------------------------------------------------------------------------------------------------------------------------------------------------------------------------------------------------------------------------------------------------------------------------------------------------------------------------------------------------------------------------------------------------------------------------------------------------------------------------------------------------------------------------------------------------------------------------------------------------------------------------------------------------------------------------------------------------------------------------------------------------------------------------------------------------------------------------------------------------------------------------------------------------------------------------------------------------------------------------------------------------------------------------------------------------------------------------|
|  |  |  | <p>walled carbon nanotubes; aggregation kinetics; low surfactant concentrations; low-temperature wgs reaction; fate; environment; evaluation; surface; ni-ceo2 catalyst   porous media; pore-scale investigation; scanning cytometry; using laser; nanoparticle transport; nanoparticles; retention; fullerene nanoparticles; role; carbonaceous nanoparticles</p> | <p>fullerene nanoparticle (369.1, 1.0E-4); vadose zone (151.73, 1.0E-4); transport behavior (149.87, 1.0E-4); tube length (149.87, 1.0E-4); water-saturated quartz sand (149.87, 1.0E-4); functionalized multi-wall carbon nanotube (146.74, 1.0E-4); natural soil (143.05, 1.0E-4); solution chemistry (141.59, 1.0E-4); deposition kinetics (132.96, 1.0E-4); aqueous fullerene nanoparticle (132.96, 1.0E-4); organic macromolecule (131.25, 1.0E-4); stable carbon nanoparticle (129.72, 1.0E-4); empirical model (127.93, 1.0E-4); downhole hydrocarbon detection (126.18, 1.0E-4); sandy soil (124.6, 1.0E-4); using laser (123.25, 1.0E-4); controlling factor (121.12, 1.0E-4); scanning cytometry (119.49, 1.0E-4); pore-scale investigation (119.49, 1.0E-4); synthesis method (114.4, 1.0E-4); water-saturated sand column (111.8, 1.0E-4); functionalized carbon nanotube (104.25, 1.0E-4); silica nanoparticle (100.54, 1.0E-4); low surfactant concentration (99.2, 1.0E-4); photoactivity properties (92.49, 1.0E-4); ag-graphene oxide nanocomposite (89.15, 1.0E-4); nanoparticle transport (88.43, 1.0E-4); stabilizing agent (87.41, 1.0E-4); enhanced mobility (84.15, 1.0E-4); columbia ecotype (79.18, 1.0E-4); cell suspension (79.18, 1.0E-4); silver nanoparticle (78.4, 1.0E-4); single walled carbon nanotube (77.9, 1.0E-4); clean porous media (74.22, 1.0E-4); multi-walled carbon nanotube deposition (74.22, 1.0E-4); graphene-based composite (69.3, 1.0E-4); new perspective (67.29, 1.0E-4); nanomaterial aquatic ecotoxicity (64.4, 1.0E-4); carbon nanotube (64.4, 1.0E-4); particle size (62.15, 1.0E-4); bridging complexation (59.52, 1.0E-4); spectrometric detection (58.97, 1.0E-4); uv-vis</p> | <p>reaction (0.44); ni-ceo2 catalyst (0.44); promoter effect (0.44); graphene-supported ni (0.44); semi-analytical model (0.44); bulk counterpart (0.44); plasma mass spectrometry (0.44); fullerene df-1 (0.44); rgo core-shell nanocomposite (0.44); ion release kinetics (0.44); respiratory deposition (0.44); biological tissue (0.44); radiosensitive mammalian cell (0.44); nonmonotonic retention (0.44); phytoremediation system (0.44); triazine-based pollutant (0.44); combined effect (0.44); using single particle (0.44); polyvinylpyrrolidone-coated silver nanoparticle (0.44); one-step approach (0.44); nano-scale tio2 (0.44); aquatic chemistry (0.4); silver sulfide nanomaterial (0.4); bacterial tactic response (0.4); amino modification (0.4); magna straus (0.4); physiochemical properties (0.4); electrochemical filter (0.4); siberian sturgeon (0.4); test media (0.4); nitrogen-fixing bacteria (0.4); potential toxicity (0.4); oxide-based nanomaterial (0.4); common aqueous antibiotic tetracycline (0.4); juvenile carp (0.4); cnt size (0.4); organic carbon (0.4); electrolyte species (0.37); bone marrow cell (0.37); colloidal sio2 (0.37); double-layer compression</p> |
|--|--|--|--------------------------------------------------------------------------------------------------------------------------------------------------------------------------------------------------------------------------------------------------------------------------------------------------------------------------------------------------------------------|--------------------------------------------------------------------------------------------------------------------------------------------------------------------------------------------------------------------------------------------------------------------------------------------------------------------------------------------------------------------------------------------------------------------------------------------------------------------------------------------------------------------------------------------------------------------------------------------------------------------------------------------------------------------------------------------------------------------------------------------------------------------------------------------------------------------------------------------------------------------------------------------------------------------------------------------------------------------------------------------------------------------------------------------------------------------------------------------------------------------------------------------------------------------------------------------------------------------------------------------------------------------------------------------------------------------------------------------------------------------------------------------------------------------------------------------------------------------------------------------------------------------------------------------------------------------------------------------------------------------------------------------------------------------------------------------------------------------------------------------|---------------------------------------------------------------------------------------------------------------------------------------------------------------------------------------------------------------------------------------------------------------------------------------------------------------------------------------------------------------------------------------------------------------------------------------------------------------------------------------------------------------------------------------------------------------------------------------------------------------------------------------------------------------------------------------------------------------------------------------------------------------------------------------------------------------------------------------------------------------------------------------------------------------------------------------------------------------------------------------------------------------------------------------------------------------------------------------------------------------------------------------------------------------------------------------------------------------------|

|                                                                                                                                                                                                                                                                                                                                                                                                                                                                                                                                                                                                                                                                                                                                                                                                                                                                                                                                                                                                                                                                                                                                                                                                                                                                                                                                                                                                                                                                                                                                                                                                                                                                                                        |                                                                                                                                                                                                                                                                                                                                                                                                                                                                                                                                                                                                                                                                                                                                                                                                                                                                                                                                                                                                                                                                                                                                                                                                                                |
|--------------------------------------------------------------------------------------------------------------------------------------------------------------------------------------------------------------------------------------------------------------------------------------------------------------------------------------------------------------------------------------------------------------------------------------------------------------------------------------------------------------------------------------------------------------------------------------------------------------------------------------------------------------------------------------------------------------------------------------------------------------------------------------------------------------------------------------------------------------------------------------------------------------------------------------------------------------------------------------------------------------------------------------------------------------------------------------------------------------------------------------------------------------------------------------------------------------------------------------------------------------------------------------------------------------------------------------------------------------------------------------------------------------------------------------------------------------------------------------------------------------------------------------------------------------------------------------------------------------------------------------------------------------------------------------------------------|--------------------------------------------------------------------------------------------------------------------------------------------------------------------------------------------------------------------------------------------------------------------------------------------------------------------------------------------------------------------------------------------------------------------------------------------------------------------------------------------------------------------------------------------------------------------------------------------------------------------------------------------------------------------------------------------------------------------------------------------------------------------------------------------------------------------------------------------------------------------------------------------------------------------------------------------------------------------------------------------------------------------------------------------------------------------------------------------------------------------------------------------------------------------------------------------------------------------------------|
| <p>spectroscopic (58.97, 1.0E-4); fullerene aggregate nc (58.97, 1.0E-4); high-performance liquid chromatography (58.97, 1.0E-4); solid phase coating (58.14, 1.0E-4); using near-infrared fluorescence spectroscopy (52.88, 1.0E-4); quantitative analysis (52.88, 1.0E-4); alkaline protease (47.64, 1.0E-4); efficient catalyst (47.64, 1.0E-4); waste-activated sludge (47.64, 1.0E-4); surfactant-modified fullerene nanoparticle (42.41, 1.0E-4); 5-polychlorinated biphenyl (42.41, 1.0E-4); one-step synthesis (37.21, 1.0E-4); aerosol spray pyrolysis (37.21, 1.0E-4); electrocatalytic activity (37.21, 1.0E-4); nanoparticles-laden graphene crumple (37.21, 1.0E-4); metal oxide nanoparticle (36.28, 1.0E-4); unsaturated porous media (36.22, 1.0E-4); surface-modified nanoparticle (36.21, 1.0E-4); cell death (31.94, 1.0E-4); carbon nanotube (30.32, 1.0E-4); aggregation kinetics (29.06, 1.0E-4); tio2 nanoparticle (27.88, 1.0E-4); facile synthesis (27.09, 1.0E-4); sulfide-containing aqueous solution (26.91, 1.0E-4); oxide-facilitated reduction (26.91, 1.0E-4); engineered nanomaterial (23.6, 1.0E-4); single-walled carbon nanotube (23, 1.0E-4); aquatic environment (22.72, 1.0E-4); wastewater treatment (22.7, 1.0E-4); cdte nanoparticle (21.82, 1.0E-4); titanium dioxide (19.38, 1.0E-4); aqueous solution (19.38, 1.0E-4); arabidopsis thaliana (18.46, 1.0E-4); engineered nanoparticle (18.45, 1.0E-4); water purification (17.73, 1.0E-4); wavelength dependency (16.8, 1.0E-4); product characterization (16.8, 1.0E-4); electrolyte species (16.25, 1.0E-4); zinc oxide nanoparticle (15.02, 0.001); graphene oxide nanomaterial (14.25, 0.001); zno</p> | <p>(0.37); illumination mode (0.37); sludge digestion (0.37); environmental effect (0.37); swiss-webster mice (0.37); size characterization (0.37); containing waste incineration residue (0.37); histopathological effect (0.37); bulk zno (0.37); titanium nitride nanotube (0.37); free-living nematode caenorhabditis elegans (0.37); polymer-stabilised nanoparticle (0.37); soil mixture (0.37); pilot wastewater treatment plant (0.37); charge neutralization (0.37); electrochemical capacitive energy storage (0.37); coaxial array (0.37); multi-angle light scattering (0.37); methyl violet (0.37); field-flow fractionation (0.37); asymmetrical flow (0.37); comparative phototoxicity (0.37); commercial tio2 nanoparticle (0.37); explicit fate modelling (0.37); different release scenario (0.35); characterization factor (0.35); seventeen subcontinental freshwater (0.35); sorption behavior (0.35); field study (0.35); natural soil system (0.35); green algae (0.35); microwave-induced carbon nanotube (0.35); agcl nanoparticle (0.35); ceriodaphnia dubia (0.35); urban soil (0.35); using different reducing agent (0.35); dunaliella tertiolecta (0.35); mediating c-60 phototransformation</p> |
|--------------------------------------------------------------------------------------------------------------------------------------------------------------------------------------------------------------------------------------------------------------------------------------------------------------------------------------------------------------------------------------------------------------------------------------------------------------------------------------------------------------------------------------------------------------------------------------------------------------------------------------------------------------------------------------------------------------------------------------------------------------------------------------------------------------------------------------------------------------------------------------------------------------------------------------------------------------------------------------------------------------------------------------------------------------------------------------------------------------------------------------------------------------------------------------------------------------------------------------------------------------------------------------------------------------------------------------------------------------------------------------------------------------------------------------------------------------------------------------------------------------------------------------------------------------------------------------------------------------------------------------------------------------------------------------------------------|--------------------------------------------------------------------------------------------------------------------------------------------------------------------------------------------------------------------------------------------------------------------------------------------------------------------------------------------------------------------------------------------------------------------------------------------------------------------------------------------------------------------------------------------------------------------------------------------------------------------------------------------------------------------------------------------------------------------------------------------------------------------------------------------------------------------------------------------------------------------------------------------------------------------------------------------------------------------------------------------------------------------------------------------------------------------------------------------------------------------------------------------------------------------------------------------------------------------------------|



|   |    |       |      |                                                                                                                                                                                                                                                                                                                                                                                           |                                                                                                                                                                                                                                                                                                                                                                                                                                                                                                                                                                                                                                                                                                                                                                                  |                                                                                                                                                                                                                                                                                                                                                                                                                                                                                                                                                                                                                                                                      |
|---|----|-------|------|-------------------------------------------------------------------------------------------------------------------------------------------------------------------------------------------------------------------------------------------------------------------------------------------------------------------------------------------------------------------------------------------|----------------------------------------------------------------------------------------------------------------------------------------------------------------------------------------------------------------------------------------------------------------------------------------------------------------------------------------------------------------------------------------------------------------------------------------------------------------------------------------------------------------------------------------------------------------------------------------------------------------------------------------------------------------------------------------------------------------------------------------------------------------------------------|----------------------------------------------------------------------------------------------------------------------------------------------------------------------------------------------------------------------------------------------------------------------------------------------------------------------------------------------------------------------------------------------------------------------------------------------------------------------------------------------------------------------------------------------------------------------------------------------------------------------------------------------------------------------|
|   |    |       |      |                                                                                                                                                                                                                                                                                                                                                                                           | nanoparticle (13.55, 0.001); gold nanoparticle (13.55, 0.001); natural water (12.27, 0.001); c-60 fullerene (11.34, 0.001); enhanced transport (11.16, 0.001); aquatic chemistry (10.83, 0.001); ceo2 nanoparticle (10.51, 0.005); silver ion (10.23, 0.005); inorganic nanoparticle (10.16, 0.005); humic acid (10.06, 0.005); aqueous c-60 cluster (9.99, 0.005); organic matter (8.99, 0.005); coated silver nanoparticle (8.99, 0.005); earthworm eisenia fetida (8.99, 0.005); anaerobic digestion (8.71, 0.005); metal ion (8.43, 0.005); plant species (8.29, 0.005)                                                                                                                                                                                                      | (0.35); chlorella vulgaris (0.35); surface complexation modeling (0.35); screening evaluation (0.35); methodological consideration (0.35); sewer system (0.35); inhibitory effect (0.35); vitro test (0.35); tetrahymena thermophila (0.35); nanoscale metal oxide (0.35); synergistic toxic effect (0.35); reduced graphene oxide material (0.35); polyaromatic hydrocarbon (0.35); direct feeding (0.35); bacterial community structure (0.35); wavelength dependency (0.34); product characterization (0.34); collector surface (0.34); aggregated nanoparticle (0.34); sativus 1 (0.34); diesel soot (0.34); part 2-toxicity (0.34); anatase nanoparticle (0.34) |
| 8 | 20 | 0.957 | 2009 | effect; evaluation; nano; test medium; cuo-exposed daphnia magna; txrf; total cu body burden; spectroscopy study; bacteria-nanoparticle interactions; environmental implications   effects; freshwater snail bellamyia aeruginosa; cu bioaccumulation; sediment-associated cuo nanoparticles; oxidative stress responses; practical considerations; exposure system; anabaena variabilis; | toxicological risk (160.4, 1.0E-4); using gene expression (155.35, 1.0E-4); oxide-coated textile (151.61, 1.0E-4); copper toxicity (150.43, 1.0E-4); ecotoxicological investigation (150.14, 1.0E-4); soil nematode (150.14, 1.0E-4); green microalgae (147.07, 1.0E-4); nanoecotoxicity testing (147.07, 1.0E-4); oxidative stress responses (146.65, 1.0E-4); tio2 nanoparticle aggregate (146.18, 1.0E-4); by-design approach (145.53, 1.0E-4); airborne nanoparticle release (145.53, 1.0E-4); physicochemical metrics (141.69, 1.0E-4); freshwater snail bellamyia aeruginosa (140.63, 1.0E-4); cu bioaccumulation (140.63, 1.0E-4); sulfidation kinetics (140.31, 1.0E-4); studying cellular uptake (136.74, 1.0E-4); agglomeration properties (135.73, 1.0E-4); bacterial | semi-analytical model (0.56); low-temperature wgs reaction (0.56); ni-ceo2 catalyst (0.56); bulk counterpart (0.56); plasma mass spectrometry (0.56); fullerene df-1 (0.56); rgo core-shell nanocomposite (0.56); ion release kinetics (0.56); promoter effect (0.56); respiratory deposition (0.56); biological tissue (0.56); graphene-supported ni (0.56); radiosensitive mammalian cell (0.56); nonmonotonic retention (0.56); phytoremediation system (0.56); triazine-based pollutant (0.56); combined effect (0.56); using single particle (0.56);                                                                                                            |

|                                                    |                                                                                                                                                                                                                                                                                                                                                                                                                                                                                                                                                                                                                                                                                                                                                                                                                                                                                                                                                                                                                                                                                                                                                                                                                                                                                                                                                                                                                                                                                                                                                                                                                                                                                                                                            |                                                                                                                                                                                                                                                                                                                                                                                                                                                                                                                                                                                                                                                                                                                                                                                                                                                                                                                                                                                                                                                                                                                                                                                                                             |
|----------------------------------------------------|--------------------------------------------------------------------------------------------------------------------------------------------------------------------------------------------------------------------------------------------------------------------------------------------------------------------------------------------------------------------------------------------------------------------------------------------------------------------------------------------------------------------------------------------------------------------------------------------------------------------------------------------------------------------------------------------------------------------------------------------------------------------------------------------------------------------------------------------------------------------------------------------------------------------------------------------------------------------------------------------------------------------------------------------------------------------------------------------------------------------------------------------------------------------------------------------------------------------------------------------------------------------------------------------------------------------------------------------------------------------------------------------------------------------------------------------------------------------------------------------------------------------------------------------------------------------------------------------------------------------------------------------------------------------------------------------------------------------------------------------|-----------------------------------------------------------------------------------------------------------------------------------------------------------------------------------------------------------------------------------------------------------------------------------------------------------------------------------------------------------------------------------------------------------------------------------------------------------------------------------------------------------------------------------------------------------------------------------------------------------------------------------------------------------------------------------------------------------------------------------------------------------------------------------------------------------------------------------------------------------------------------------------------------------------------------------------------------------------------------------------------------------------------------------------------------------------------------------------------------------------------------------------------------------------------------------------------------------------------------|
| <p>microbial communities; multimethod approach</p> | <p>cytotoxicity (135.73, 1.0E-4); practical consideration (135.29, 1.0E-4); copper oxide nanoparticle (131.78, 1.0E-4); cultured fish hepatocyte (130.84, 1.0E-4); physical effect (130.27, 1.0E-4); conducting ecotoxicity test method (126.83, 1.0E-4); manufactured nanomaterial (126.83, 1.0E-4); toxicological effect (125.25, 1.0E-4); algae phaeodactylum tricorutum (121.89, 1.0E-4); test guideline (120.23, 1.0E-4); unicellular green algae (120.23, 1.0E-4); nanometer titanium dioxide (116.95, 1.0E-4); chlamydomonas reinhardtii (116.95, 1.0E-4); nanosized particle (115.21, 1.0E-4); exposure system (112.01, 1.0E-4); staphylococcus aureus atcc (110.2, 1.0E-4); enzyme toxicity (107.07, 1.0E-4); surface water sample (105.18, 1.0E-4); physicochemical transformation (105.18, 1.0E-4); aeruginosa atcc (102.14, 1.0E-4); oxidative damage (96.77, 1.0E-4); adverse effect (96.06, 1.0E-4); tio2 nanoparticle (95.8, 1.0E-4); particle-size effect (95.15, 1.0E-4); daphnia magna (92.98, 1.0E-4); engineered fe2o3 nanoparticle (92.3, 1.0E-4); co2-induced seawater acidification (92.3, 1.0E-4); test medium (90.13, 1.0E-4); total cu body burden (90.13, 1.0E-4); spectroscopy study (90.13, 1.0E-4); platinum nanoparticle (85.12, 1.0E-4); cuo-exposed daphnia magna (82.47, 1.0E-4); ceo2 nanoparticle (78.88, 1.0E-4); investigating algal toxicity (77.57, 1.0E-4); organic matter (77.14, 1.0E-4); marine environment (75.44, 1.0E-4); protozoan tetrahymena thermophila (75.09, 1.0E-4); toxic action (75.09, 1.0E-4); phenotypic event (75.09, 1.0E-4); hemocyte parameter (72.67, 1.0E-4); green-lipped mussel perna (72.67, 1.0E-4); cytometric analysis (72.67, 1.0E-4); graphene oxide (69.14,</p> | <p>polyvinylpyrrolidone-coated silver nanoparticle (0.56); one-step approach (0.56); nano-scale tio2 (0.56); siberian sturgeon (0.51); silver sulfide nanomaterial (0.51); bacterial tactic response (0.51); amino modification (0.51); magna straus (0.51); physiochemical properties (0.51); electrochemical filter (0.51); test media (0.51); nitrogen-fixing bacteria (0.51); potential toxicity (0.51); oxide-based nanomaterial (0.51); common aqueous antibiotic tetracycline (0.51); juvenile carp (0.51); cnt size (0.51); organic carbon (0.51); aquatic chemistry (0.51); histopathological effect (0.47); bone marrow cell (0.47); colloidal sio2 (0.47); double-layer compression (0.47); illumination mode (0.47); sludge digestion (0.47); environmental effect (0.47); swiss-webster mice (0.47); size characterization (0.47); containing waste incineration residue (0.47); bulk zno (0.47); titanium nitride nanotube (0.47); free-living nematode caenorhabditis elegans (0.47); polymer-stabilised nanoparticle (0.47); soil mixture (0.47); pilot wastewater treatment plant (0.47); charge neutralization (0.47); electrochemical capacitive energy storage (0.47); coaxial array (0.47); multi-</p> |
|----------------------------------------------------|--------------------------------------------------------------------------------------------------------------------------------------------------------------------------------------------------------------------------------------------------------------------------------------------------------------------------------------------------------------------------------------------------------------------------------------------------------------------------------------------------------------------------------------------------------------------------------------------------------------------------------------------------------------------------------------------------------------------------------------------------------------------------------------------------------------------------------------------------------------------------------------------------------------------------------------------------------------------------------------------------------------------------------------------------------------------------------------------------------------------------------------------------------------------------------------------------------------------------------------------------------------------------------------------------------------------------------------------------------------------------------------------------------------------------------------------------------------------------------------------------------------------------------------------------------------------------------------------------------------------------------------------------------------------------------------------------------------------------------------------|-----------------------------------------------------------------------------------------------------------------------------------------------------------------------------------------------------------------------------------------------------------------------------------------------------------------------------------------------------------------------------------------------------------------------------------------------------------------------------------------------------------------------------------------------------------------------------------------------------------------------------------------------------------------------------------------------------------------------------------------------------------------------------------------------------------------------------------------------------------------------------------------------------------------------------------------------------------------------------------------------------------------------------------------------------------------------------------------------------------------------------------------------------------------------------------------------------------------------------|

|  |  |  |  |                                                                                                                                                                                                                                                                                                                                                                                                                                                                                                                                                                                                                                                                                                                                                                                                                                                                                                                                                                                                                                                                                                                                                                                                                                                                                                                                                                                                                                                                                                                                                                                                                                                                           |                                                                                                                                                                                                                                                                                                                                                                                                                                                                                                                                                                                                                                                                                                                                                                                                                                                                                                                                                                                                                                                                                                                                                                                                                                              |
|--|--|--|--|---------------------------------------------------------------------------------------------------------------------------------------------------------------------------------------------------------------------------------------------------------------------------------------------------------------------------------------------------------------------------------------------------------------------------------------------------------------------------------------------------------------------------------------------------------------------------------------------------------------------------------------------------------------------------------------------------------------------------------------------------------------------------------------------------------------------------------------------------------------------------------------------------------------------------------------------------------------------------------------------------------------------------------------------------------------------------------------------------------------------------------------------------------------------------------------------------------------------------------------------------------------------------------------------------------------------------------------------------------------------------------------------------------------------------------------------------------------------------------------------------------------------------------------------------------------------------------------------------------------------------------------------------------------------------|----------------------------------------------------------------------------------------------------------------------------------------------------------------------------------------------------------------------------------------------------------------------------------------------------------------------------------------------------------------------------------------------------------------------------------------------------------------------------------------------------------------------------------------------------------------------------------------------------------------------------------------------------------------------------------------------------------------------------------------------------------------------------------------------------------------------------------------------------------------------------------------------------------------------------------------------------------------------------------------------------------------------------------------------------------------------------------------------------------------------------------------------------------------------------------------------------------------------------------------------|
|  |  |  |  | <p>1.0E-4); oreochromis niloticus (65.07, 1.0E-4); tissue accumulation (65.07, 1.0E-4); serum biochemistry (65.07, 1.0E-4); zinc nanoparticle (65.07, 1.0E-4); containing nanoscale polymeric complex (62.91, 1.0E-4); applying multi-marker approach (62.91, 1.0E-4); developmental toxicity (58.12, 1.0E-4); histopathological change (58.04, 1.0E-4); porous media (57.52, 1.0E-4); stable aqueous fullerene nanocrystal (55.05, 1.0E-4); freshwater alga euglena intermedia (53.18, 1.0E-4); bioaccumulation kinetics (53.18, 1.0E-4); carbon nanotube (52.04, 1.0E-4); hop frequency (48.34, 1.0E-4); different condition (48.34, 1.0E-4); humic acid (47.31, 1.0E-4); gene expression (44.87, 1.0E-4); agronomically-relevant rhizobium-legume symbiosis (43.52, 1.0E-4); possible mechanism (40.03, 1.0E-4); sub-toxic effect (40.03, 1.0E-4); environmental element (38.71, 1.0E-4); multi-walled carbon nanotube (37.99, 1.0E-4); methane production (36.49, 1.0E-4); algal toxicity (36.27, 1.0E-4); receiving manufactured nanomaterial (35.02, 1.0E-4); wastewater treatment plant (35.02, 1.0E-4); cu ion (33.92, 1.0E-4); hematite nanoparticle (31.45, 1.0E-4); solution chemistry (30.58, 1.0E-4); engineered nanomaterial (30.56, 1.0E-4); subcellular distribution (30.02, 1.0E-4); transfer efficiency (30.02, 1.0E-4); low nanomaterial concentration (29.17, 1.0E-4); wastewater treatment (28.17, 1.0E-4); single-walled carbon nanotube (25.73, 1.0E-4); reductive dechlorinating microbial communities (25.01, 1.0E-4); new zero-valent iron nanomaterial (25.01, 1.0E-4); titanium dioxide (24.04, 1.0E-4); aqueous solution (24.04, 1.0E-4)</p> | <p>angle light scattering (0.47); methyl violet (0.47); field-flow fractionation (0.47); asymmetrical flow (0.47); comparative phototoxicity (0.47); electrolyte species (0.47); commercial tio2 nanoparticle (0.47); explicit fate modelling (0.47); methodological consideration (0.45); characterization factor (0.45); seventeen subcontinental freshwater (0.45); sorption behavior (0.45); field study (0.45); natural soil system (0.45); green algae (0.45); microwave-induced carbon nanotube (0.45); agcl nanoparticle (0.45); ceriodaphnia dubia (0.45); urban soil (0.45); using different reducing agent (0.45); dunaliella tertiolecta (0.45); mediating c-60 phototransformation (0.45); chlorella vulgaris (0.45); surface complexation modeling (0.45); screening evaluation (0.45); sewer system (0.45); inhibitory effect (0.45); vitro test (0.45); tetrahymena thermophila (0.45); nanoscale metal oxide (0.45); synergistic toxic effect (0.45); reduced graphene oxide material (0.45); polyaromatic hydrocarbon (0.45); direct feeding (0.45); bacterial community structure (0.45); different release scenario (0.45); reductive dechlorinating microbial communities (0.43); new zero-valent iron nanomaterial</p> |
|--|--|--|--|---------------------------------------------------------------------------------------------------------------------------------------------------------------------------------------------------------------------------------------------------------------------------------------------------------------------------------------------------------------------------------------------------------------------------------------------------------------------------------------------------------------------------------------------------------------------------------------------------------------------------------------------------------------------------------------------------------------------------------------------------------------------------------------------------------------------------------------------------------------------------------------------------------------------------------------------------------------------------------------------------------------------------------------------------------------------------------------------------------------------------------------------------------------------------------------------------------------------------------------------------------------------------------------------------------------------------------------------------------------------------------------------------------------------------------------------------------------------------------------------------------------------------------------------------------------------------------------------------------------------------------------------------------------------------|----------------------------------------------------------------------------------------------------------------------------------------------------------------------------------------------------------------------------------------------------------------------------------------------------------------------------------------------------------------------------------------------------------------------------------------------------------------------------------------------------------------------------------------------------------------------------------------------------------------------------------------------------------------------------------------------------------------------------------------------------------------------------------------------------------------------------------------------------------------------------------------------------------------------------------------------------------------------------------------------------------------------------------------------------------------------------------------------------------------------------------------------------------------------------------------------------------------------------------------------|

|   |    |       |      |                                                                                                                                                                                                                                                                                                                                                                                |                                                                                                                                                                                                                                                                                                                                                                                                                                                                                                                                                                                                                                                                                                                                                                                                                                                                                                                                                                                                                                                                                                                                                                                                                                                                                                                                                     |                                                                                                                                                                                                                                                                                                                                                                                                                                                                                                                                                                                                                                                                                                                                                                                                                                                                                                                                                                        |
|---|----|-------|------|--------------------------------------------------------------------------------------------------------------------------------------------------------------------------------------------------------------------------------------------------------------------------------------------------------------------------------------------------------------------------------|-----------------------------------------------------------------------------------------------------------------------------------------------------------------------------------------------------------------------------------------------------------------------------------------------------------------------------------------------------------------------------------------------------------------------------------------------------------------------------------------------------------------------------------------------------------------------------------------------------------------------------------------------------------------------------------------------------------------------------------------------------------------------------------------------------------------------------------------------------------------------------------------------------------------------------------------------------------------------------------------------------------------------------------------------------------------------------------------------------------------------------------------------------------------------------------------------------------------------------------------------------------------------------------------------------------------------------------------------------|------------------------------------------------------------------------------------------------------------------------------------------------------------------------------------------------------------------------------------------------------------------------------------------------------------------------------------------------------------------------------------------------------------------------------------------------------------------------------------------------------------------------------------------------------------------------------------------------------------------------------------------------------------------------------------------------------------------------------------------------------------------------------------------------------------------------------------------------------------------------------------------------------------------------------------------------------------------------|
|   |    |       |      |                                                                                                                                                                                                                                                                                                                                                                                |                                                                                                                                                                                                                                                                                                                                                                                                                                                                                                                                                                                                                                                                                                                                                                                                                                                                                                                                                                                                                                                                                                                                                                                                                                                                                                                                                     | (0.43); marine invertebrate (0.43); bivalve mollusc scrobicularia plana (0.43); metal-based nanoparticle (0.43); annelid polychaete hediste diversicolor (0.43); wavelength dependency (0.43); sativus 1 (0.43)                                                                                                                                                                                                                                                                                                                                                                                                                                                                                                                                                                                                                                                                                                                                                        |
| 9 | 19 | 0.984 | 2008 | influence; toxicity; multiwalled carbon nanotubes; natural organic matter; sediment dwelling; multiwall carbon nanotubes; carbon nanotube; gold nanoparticles; release; depuration   carbon nanotubes; sediment dwelling; sublethal toxicity; nano-titanium dioxide; marine polychaete; release; abrasion process; epoxy-based nanocomposite; direct feeding; trophic transfer | surface oxygen (143.37, 1.0E-4); occupational exposure (137.65, 1.0E-4); sublethal toxicity (135.13, 1.0E-4); environmental laboratory studies (134.63, 1.0E-4); engineered carbon-based nanomaterial (134.63, 1.0E-4); nano-titanium dioxide (131.94, 1.0E-4); marine polychaete (131.94, 1.0E-4); carbon nanotube type (126.25, 1.0E-4); long-term colloidal stability (126.25, 1.0E-4); stabilizing multi-walled carbon nanotube suspension (123.65, 1.0E-4); triton x-series surfactant (123.65, 1.0E-4); soil mineral (121.19, 1.0E-4); 14-labeled multi-walled carbon nanotube (117.92, 1.0E-4); benthic organism (109.67, 1.0E-4); marine food chain (109.67, 1.0E-4); lumbriculus variegatus (105.24, 1.0E-4); different stabilities (103.94, 1.0E-4); fresh surface water sample (103.94, 1.0E-4); quantitative investigation (103.6, 1.0E-4); carbon nanotube (102.74, 1.0E-4); multiwalled carbon nanotube (101.72, 1.0E-4); carbon nanotubes toxicity (99.37, 1.0E-4); natural organic matter (95.54, 1.0E-4); peat soil (91.72, 1.0E-4); suspending multi-walled carbon nanotube (91.72, 1.0E-4); earthworm bioaccumulation (90.66, 1.0E-4); containing model solid (78.63, 1.0E-4); 14-labeled multiwalled carbon nanotube (78.63, 1.0E-4); phase distribution (78.63, 1.0E-4); earthworm eisenia veneta (72.63, 1.0E-4); comparative | plasma mass spectrometry (0.29); biological tissue (0.29); using single particle (0.29); semi-analytical model (0.29); low-temperature wgs reaction (0.29); ni-ceo2 catalyst (0.29); bulk counterpart (0.29); fullerene df-1 (0.29); rgo core-shell nanocomposite (0.29); ion release kinetics (0.29); promoter effect (0.29); respiratory deposition (0.29); graphene-supported ni (0.29); radiosensitive mammalian cell (0.29); nonmonotonic retention (0.29); phytoremediation system (0.29); triazine-based pollutant (0.29); combined effect (0.29); polyvinylpyrrolidone-coated silver nanoparticle (0.29); one-step approach (0.29); nano-scale tio2 (0.29); electrochemical filter (0.26); common aqueous antibiotic tetracycline (0.26); silver sulfide nanomaterial (0.26); bacterial tactic response (0.26); amino modification (0.26); magna straus (0.26); physiochemical properties (0.26); siberian sturgeon (0.26); test media (0.26); nitrogen-fixing |

chronic toxicity (72.63, 1.0E-4); bacteria (0.26);  
 soil matrix (72.63, 1.0E-4); potential toxicity (0.26);  
 ionic zinc (72.63, 1.0E-4); oxide-based  
 surface modification (66.64, nanomaterial (0.26);  
 1.0E-4); single-walled carbon juvenile carp (0.26); cnt  
 nanotube retention (66.64, 1.0E- size (0.26); organic  
 4); radio-labeled graphene carbon (0.26); aquatic  
 (60.67, 1.0E-4); biological chemistry (0.26); size  
 uptake (60.67, 1.0E-4); daphnia characterization (0.24);  
 magna (59.42, 1.0E-4); multi- multi-angle light  
 walled carbon nanotube (59.22, scattering (0.24); field-  
 1.0E-4); humic acid (55.34, flow fractionation  
 1.0E-4); natural organic matter (0.24); asymmetrical  
 type (54.71, 1.0E-4); octanol- flow (0.24); bone  
 water distribution measurement marrow cell (0.24);  
 (48.77, 1.0E-4); potential colloidal sio2 (0.24);  
 ecological uptake (48.77, 1.0E- double-layer  
 4); adverse effect (46.78, 1.0E- compression (0.24);  
 4); aqueous system (40.76, illumination mode  
 1.0E-4); single-walled carbon (0.24); sludge digestion  
 nanotube (40.73, 1.0E-4); (0.24); environmental  
 unsaturated porous media effect (0.24); swiss-  
 (39.04, 1.0E-4); graphene oxide webster mice (0.24);  
 (38.67, 1.0E-4); representative containing waste  
 mature leachate (36.97, 1.0E-4); incineration residue  
 single-walled carbon nanotube (0.24);  
 behavior (36.97, 1.0E-4); histopathological effect  
 epoxy-based nanocomposite (0.24); bulk zno (0.24);  
 (36.77, 1.0E-4); abrasion titanium nitride  
 process (36.77, 1.0E-4); silver nanotube (0.24); free-  
 nanoparticle (36.77, 1.0E-4); living nematode  
 porous media (32.18, 1.0E-4); caenorhabditis elegans  
 diesel soot (30.64, 1.0E-4); (0.24); polymer-  
 hydrophobic organic stabilised nanoparticle  
 contaminant (30.64, 1.0E-4); (0.24); soil mixture  
 benthic invertebrate (30.64, (0.24); pilot wastewater  
 1.0E-4); tetrahymena treatment plant (0.24);  
 thermophila (24.51, 1.0E-4); charge neutralization  
 direct feeding (24.51, 1.0E-4); (0.24); electrochemical  
 citrate-stabilized gold capacitive energy  
 nanoparticle (23.02, 1.0E-4); storage (0.24); coaxial  
 size characterization (18.38, array (0.24); methyl  
 1.0E-4); multi-angle light violet (0.24);  
 scattering (18.38, 1.0E-4); comparative  
 field-flow fractionation (18.38, phototoxicity (0.24);  
 1.0E-4); asymmetrical flow (18.38, electrolyte species  
 1.0E-4); acute toxicity (17.45, (0.24); commercial tio2  
 1.0E-4); wastewater treatment nanoparticle (0.24);  
 (15.75, 1.0E-4); titanium explicit fate modelling  
 dioxide (13.45, 0.001); aqueous (0.24); tetrahymena  
 solution (13.45, 0.001); aquatic thermophila (0.23);  
 environment (13.34, 0.001); tio2 direct feeding (0.23);  
 nanoparticle (12.86, 0.001); methodological  
 electrochemical filter (12.25, consideration (0.23);  
 0.001); common aqueous characterization factor  
 antibiotic tetracycline (12.25, (0.23); seventeen  
 0.001); engineered nanomaterial subcontinental

|    |    |       |      |                                                                                                                                                                                              |                                                                                                                                                                                                                                                                                                                                                                                                                                                                                                                                                                                                                                                                                                                                                                                                                                                                                                                                                                                                                 |                                                                                                                                                                                                                                                                                                                                                                                                                                                                                                                                                                                                                                                                                                                                                                                                                                                                                                                                                       |
|----|----|-------|------|----------------------------------------------------------------------------------------------------------------------------------------------------------------------------------------------|-----------------------------------------------------------------------------------------------------------------------------------------------------------------------------------------------------------------------------------------------------------------------------------------------------------------------------------------------------------------------------------------------------------------------------------------------------------------------------------------------------------------------------------------------------------------------------------------------------------------------------------------------------------------------------------------------------------------------------------------------------------------------------------------------------------------------------------------------------------------------------------------------------------------------------------------------------------------------------------------------------------------|-------------------------------------------------------------------------------------------------------------------------------------------------------------------------------------------------------------------------------------------------------------------------------------------------------------------------------------------------------------------------------------------------------------------------------------------------------------------------------------------------------------------------------------------------------------------------------------------------------------------------------------------------------------------------------------------------------------------------------------------------------------------------------------------------------------------------------------------------------------------------------------------------------------------------------------------------------|
|    |    |       |      |                                                                                                                                                                                              | (11.58, 0.001); titanium dioxide nanoparticle (11.02, 0.001); solution chemistry (11.02, 0.001); fullerene nanoparticle (9.88, 0.005); graphene oxide nanomaterial (9.88, 0.005); zno nanoparticle (9.4, 0.005); aggregation kinetics (8.92, 0.005); engineered nanoparticle (7.73, 0.01); water purification (7.48, 0.01); ceo2 nanoparticle (7.29, 0.01); natural water (7.26, 0.01); organic matter (6.23, 0.05); coated silver nanoparticle (6.23, 0.05); earthworm eisenia fetida (6.23, 0.05); plasma mass spectrometry (6.12, 0.05); biological tissue (6.12, 0.05); using single particle (6.12, 0.05); anaerobic digestion (6.04, 0.05); metal oxide nanoparticle (5.9, 0.05); zinc oxide nanoparticle (5.77, 0.05); theoretical studies (5.66, 0.05); carbon nanomaterial (5.56, 0.05); environmental risk assessment (5.37, 0.05); facile synthesis (5.37, 0.05); suwannee river (5.27, 0.05); graphene oxide nanoparticle (5.18, 0.05); comparative study (5.18, 0.05); algal toxicity (5.18, 0.05) | freshwater (0.23); sorption behavior (0.23); field study (0.23); natural soil system (0.23); green algae (0.23); microwave-induced carbon nanotube (0.23); agcl nanoparticle (0.23); ceriodaphnia dubia (0.23); urban soil (0.23); using different reducing agent (0.23); dunaliella tertiolecta (0.23); mediating c-60 phototransformation (0.23); chlorella vulgaris (0.23); surface complexation modeling (0.23); screening evaluation (0.23); sewer system (0.23); inhibitory effect (0.23); vitro test (0.23); nanoscale metal oxide (0.23); synergistic toxic effect (0.23); reduced graphene oxide material (0.23); polyaromatic hydrocarbon (0.23); bacterial community structure (0.23); different release scenario (0.23); diesel soot (0.22); hydrophobic organic contaminant (0.22); benthic invertebrate (0.22); anatase nanoparticle (0.22); pure anatase (0.22); wheat seedling (0.22); wavelength dependency (0.22); sativus 1 (0.22) |
| 10 | 19 | 0.985 | 2010 | graphene oxide; removal; role; oxide-based nanomaterials; aqueous media; pharmaceuticals; phenols; oxide-magnetic nanoparticles; phenols sensor; high-efficiency   graphene; exafs; modeling | modeling technique (293.96, 1.0E-4); graphene nanosheet (216.35, 1.0E-4); graphene-templated formation (206.02, 1.0E-4); preparing high-rate supercapacitor electrode (200.85, 1.0E-4); graphene oxide sheet (200.85, 1.0E-4); high-performance asymmetric supercapacitor (195.69, 1.0E-4); graphene-based electrode (195.69, 1.0E-4); metal oxide composite (190.52, 1.0E-4);                                                                                                                                                                                                                                                                                                                                                                                                                                                                                                                                                                                                                                  | rgo core-shell nanocomposite (0.52); one-step approach (0.52); semi-analytical model (0.52); low-temperature wgs reaction (0.52); ni-ceo2 catalyst (0.52); bulk counterpart (0.52); plasma mass spectrometry (0.52); fullerene df-1 (0.52); ion release kinetics                                                                                                                                                                                                                                                                                                                                                                                                                                                                                                                                                                                                                                                                                      |

|  |  |  |                                                                                                                                                         |                                                                                                                                                                                                                                                                                                                                                                                                                                                                                                                                                                                                                                                                                                                                                                                                                                                                                                                                                                                                                                                                                                                                                                                                                                                                                                                                                                                                                                                                                                                                                                                                                                                                                                                                          |                                                                                                                                                                                                                                                                                                                                                                                                                                                                                                                                                                                                                                                                                                                                                                                                                                                                                                                                                                                                                                                                                                                                                                                                                                        |
|--|--|--|---------------------------------------------------------------------------------------------------------------------------------------------------------|------------------------------------------------------------------------------------------------------------------------------------------------------------------------------------------------------------------------------------------------------------------------------------------------------------------------------------------------------------------------------------------------------------------------------------------------------------------------------------------------------------------------------------------------------------------------------------------------------------------------------------------------------------------------------------------------------------------------------------------------------------------------------------------------------------------------------------------------------------------------------------------------------------------------------------------------------------------------------------------------------------------------------------------------------------------------------------------------------------------------------------------------------------------------------------------------------------------------------------------------------------------------------------------------------------------------------------------------------------------------------------------------------------------------------------------------------------------------------------------------------------------------------------------------------------------------------------------------------------------------------------------------------------------------------------------------------------------------------------------|----------------------------------------------------------------------------------------------------------------------------------------------------------------------------------------------------------------------------------------------------------------------------------------------------------------------------------------------------------------------------------------------------------------------------------------------------------------------------------------------------------------------------------------------------------------------------------------------------------------------------------------------------------------------------------------------------------------------------------------------------------------------------------------------------------------------------------------------------------------------------------------------------------------------------------------------------------------------------------------------------------------------------------------------------------------------------------------------------------------------------------------------------------------------------------------------------------------------------------------|
|  |  |  | <p>techniques; oxide-based composites; mechanistic insights; decontamination; phenols; graphene oxide; oxide-magnetic nanoparticles; phenols sensor</p> | <p>reduced graphene (190.52, 1.0E-4); potential electrode material (185.36, 1.0E-4); efficient electrocatalyst (180.2, 1.0E-4); zn-air batteries (180.2, 1.0E-4); ionic liquid (180.2, 1.0E-4); anchoring manganese oxide nanoparticle (180.2, 1.0E-4); catalytic degradation (179.84, 1.0E-4); controlled electronic structure (175.04, 1.0E-4); non-covalent doping (175.04, 1.0E-4); graphitic carbon nitride polymer (175.04, 1.0E-4); enhanced optoelectronic conversion (175.04, 1.0E-4); mechanistic insight (169.88, 1.0E-4); oxide-based composite (169.88, 1.0E-4); mesoporous carbon (166.46, 1.0E-4); facile preparation route (164.71, 1.0E-4); boron-doped graphene (164.71, 1.0E-4); cdte solar cell application (164.71, 1.0E-4); linear free energy relationship modeling (159.56, 1.0E-4); unveiling adsorption mechanism (159.56, 1.0E-4); functional theory computation (159.56, 1.0E-4); high oxygen-reduction activity (154.4, 1.0E-4); nitrogen-doped graphene (154.4, 1.0E-4); enhanced supercapacitor performance (154.4, 1.0E-4); flexible energy storage device (149.24, 1.0E-4); graphene paper (149.24, 1.0E-4); aqueous solution (145.89, 1.0E-4); colloidal graphene oxide nanoparticle (144.08, 1.0E-4); organic pollutant (140.23, 1.0E-4); metal oxide surface (138.92, 1.0E-4); ciprofloxacin adsorption (133.77, 1.0E-4); methylene blue (128.61, 1.0E-4); magnetite composite (128.61, 1.0E-4); silver nanoparticle (123.93, 1.0E-4); mechanical investigation (123.46, 1.0E-4); single-crystal zno (118.31, 1.0E-4); nanoporous metal oxide shell composite (118.31, 1.0E-4); controllable electrochemical synthesis (118.31, 1.0E-4); facile synthesis (116.05, 1.0E-4); emerging contaminant</p> | <p>(0.52); promoter effect (0.52); respiratory deposition (0.52); biological tissue (0.52); graphene-supported ni (0.52); radiosensitive mammalian cell (0.52); nonmonotonic retention (0.52); phytoremediation system (0.52); triazine-based pollutant (0.52); combined effect (0.52); using single particle (0.52); polyvinylpyrrolidone-coated silver nanoparticle (0.52); nano-scale tio2 (0.52); amino modification (0.47); oxide-based nanomaterial (0.47); silver sulfide nanomaterial (0.47); bacterial tactic response (0.47); magna straus (0.47); physiochemical properties (0.47); electrochemical filter (0.47); siberian sturgeon (0.47); test media (0.47); nitrogen-fixing bacteria (0.47); potential toxicity (0.47); common aqueous antibiotic tetracycline (0.47); juvenile carp (0.47); cnt size (0.47); organic carbon (0.47); aquatic chemistry (0.47); titanium nitride nanotube (0.44); electrochemical capacitive energy storage (0.44); coaxial array (0.44); colloidal sio2 (0.44); bone marrow cell (0.44); double-layer compression (0.44); illumination mode (0.44); sludge digestion (0.44); environmental effect (0.44); swiss-webster mice (0.44); size characterization (0.44); containing waste</p> |
|--|--|--|---------------------------------------------------------------------------------------------------------------------------------------------------------|------------------------------------------------------------------------------------------------------------------------------------------------------------------------------------------------------------------------------------------------------------------------------------------------------------------------------------------------------------------------------------------------------------------------------------------------------------------------------------------------------------------------------------------------------------------------------------------------------------------------------------------------------------------------------------------------------------------------------------------------------------------------------------------------------------------------------------------------------------------------------------------------------------------------------------------------------------------------------------------------------------------------------------------------------------------------------------------------------------------------------------------------------------------------------------------------------------------------------------------------------------------------------------------------------------------------------------------------------------------------------------------------------------------------------------------------------------------------------------------------------------------------------------------------------------------------------------------------------------------------------------------------------------------------------------------------------------------------------------------|----------------------------------------------------------------------------------------------------------------------------------------------------------------------------------------------------------------------------------------------------------------------------------------------------------------------------------------------------------------------------------------------------------------------------------------------------------------------------------------------------------------------------------------------------------------------------------------------------------------------------------------------------------------------------------------------------------------------------------------------------------------------------------------------------------------------------------------------------------------------------------------------------------------------------------------------------------------------------------------------------------------------------------------------------------------------------------------------------------------------------------------------------------------------------------------------------------------------------------------|

|  |  |  |  |                                                                                                                                                                                                                                                                                                                                                                                                                                                                                                                                                                                                                                                                                                                                                                                                                                                                                                                                                                                                                                                                                                                                                                                                                                                                                                                                                                                                                                                                                                                                                                                                                                                                                                                                           |                                                                                                                                                                                                                                                                                                                                                                                                                                                                                                                                                                                                                                                                                                                                                                                                                                                                                                                                                                                                                                                                                                                                                                                                              |
|--|--|--|--|-------------------------------------------------------------------------------------------------------------------------------------------------------------------------------------------------------------------------------------------------------------------------------------------------------------------------------------------------------------------------------------------------------------------------------------------------------------------------------------------------------------------------------------------------------------------------------------------------------------------------------------------------------------------------------------------------------------------------------------------------------------------------------------------------------------------------------------------------------------------------------------------------------------------------------------------------------------------------------------------------------------------------------------------------------------------------------------------------------------------------------------------------------------------------------------------------------------------------------------------------------------------------------------------------------------------------------------------------------------------------------------------------------------------------------------------------------------------------------------------------------------------------------------------------------------------------------------------------------------------------------------------------------------------------------------------------------------------------------------------|--------------------------------------------------------------------------------------------------------------------------------------------------------------------------------------------------------------------------------------------------------------------------------------------------------------------------------------------------------------------------------------------------------------------------------------------------------------------------------------------------------------------------------------------------------------------------------------------------------------------------------------------------------------------------------------------------------------------------------------------------------------------------------------------------------------------------------------------------------------------------------------------------------------------------------------------------------------------------------------------------------------------------------------------------------------------------------------------------------------------------------------------------------------------------------------------------------------|
|  |  |  |  | <p>metformin (113.15, 1.0E-4); using graphene oxide (113.15, 1.0E-4); carboxylic group (108, 1.0E-4); electrochemical capacitor (108, 1.0E-4); carbon nanofiber hybrid (102.85, 1.0E-4); effective enrichment (102.85, 1.0E-4); plasma-facilitated synthesis (102.85, 1.0E-4); enhanced transport (101.86, 1.0E-4); graphene nanomaterial (97.7, 1.0E-4); tricresyl phosphate (97.7, 1.0E-4); ionic condensation (92.55, 1.0E-4); polarizable energy-storage membrane (92.55, 1.0E-4); high performance (92.55, 1.0E-4); soil trench (87.4, 1.0E-4); water purification (85.77, 1.0E-4); carbon nanomaterial (79.74, 1.0E-4); oxide-wrapped carbon (77.11, 1.0E-4); phenols sensor (77.11, 1.0E-4); graphene nanoribbon (71.96, 1.0E-4); graphene oxide nanosheet (66.82, 1.0E-4); engineered nanomaterial (62.05, 1.0E-4); theoretical investigation (61.67, 1.0E-4); magnetic graphene oxide (61.67, 1.0E-4); reduced graphene oxide (61.67, 1.0E-4); clofibric acid (56.53, 1.0E-4); tio2 nanoparticle (53.16, 1.0E-4); stereoselective adsorption behavior (46.24, 1.0E-4); isomeric pesticide (46.24, 1.0E-4); oxide-magnetic nanoparticle (46.24, 1.0E-4); efficient adsorbent (46.24, 1.0E-4); c composite (41.1, 1.0E-4); new synthesis (41.1, 1.0E-4); graphene oxide nanomaterial (40.1, 1.0E-4); humic acid (36.3, 1.0E-4); comprising carbon sphere (35.96, 1.0E-4); self-assembled hierarchical nanostructure (35.96, 1.0E-4); multi-walled carbon nanotube (35.43, 1.0E-4); aquatic environment (33.08, 1.0E-4); polycyclic aromatic hydrocarbon (32.84, 1.0E-4); graphene sheet (30.82, 1.0E-4); using cobalt (30.82, 1.0E-4); porous media (30.51, 1.0E-4); engineered nanoparticle (29.16, 1.0E-4); titanium dioxide</p> | <p>incineration residue (0.44); histopathological effect (0.44); bulk zno (0.44); free-living nematode caenorhabditis elegans (0.44); polymer-stabilised nanoparticle (0.44); soil mixture (0.44); pilot wastewater treatment plant (0.44); charge neutralization (0.44); multi-angle light scattering (0.44); methyl violet (0.44); field-flow fractionation (0.44); asymmetrical flow (0.44); comparative phototoxicity (0.44); electrolyte species (0.44); commercial tio2 nanoparticle (0.44); explicit fate modelling (0.44); surface complexation modeling (0.42); using different reducing agent (0.42); reduced graphene oxide material (0.42); characterization factor (0.42); seventeen subcontinental freshwater (0.42); sorption behavior (0.42); field study (0.42); natural soil system (0.42); green algae (0.42); microwave-induced carbon nanotube (0.42); agcl nanoparticle (0.42); ceriodaphnia dubia (0.42); urban soil (0.42); dunaliella tertiolecta (0.42); mediating c-60 phototransformation (0.42); chlorella vulgaris (0.42); screening evaluation (0.42); methodological consideration (0.42); sewer system (0.42); inhibitory effect (0.42); vitro test (0.42); tetrahymena</p> |
|--|--|--|--|-------------------------------------------------------------------------------------------------------------------------------------------------------------------------------------------------------------------------------------------------------------------------------------------------------------------------------------------------------------------------------------------------------------------------------------------------------------------------------------------------------------------------------------------------------------------------------------------------------------------------------------------------------------------------------------------------------------------------------------------------------------------------------------------------------------------------------------------------------------------------------------------------------------------------------------------------------------------------------------------------------------------------------------------------------------------------------------------------------------------------------------------------------------------------------------------------------------------------------------------------------------------------------------------------------------------------------------------------------------------------------------------------------------------------------------------------------------------------------------------------------------------------------------------------------------------------------------------------------------------------------------------------------------------------------------------------------------------------------------------|--------------------------------------------------------------------------------------------------------------------------------------------------------------------------------------------------------------------------------------------------------------------------------------------------------------------------------------------------------------------------------------------------------------------------------------------------------------------------------------------------------------------------------------------------------------------------------------------------------------------------------------------------------------------------------------------------------------------------------------------------------------------------------------------------------------------------------------------------------------------------------------------------------------------------------------------------------------------------------------------------------------------------------------------------------------------------------------------------------------------------------------------------------------------------------------------------------------|



|    |    |       |      |                                                                                                                                                                                                                                                                                                                                                                                                                                    |                                                                                                                                                                                                                                                                                                                                                                                                                                                                                                                                                                                                                                                                                                                                                                                                                                                                                                                                                                                                                                                                                                 |                                                                                                                                                                                                                                                                                                                                                                                                                                                                                                                                                                                                                                                                                                                                                                   |
|----|----|-------|------|------------------------------------------------------------------------------------------------------------------------------------------------------------------------------------------------------------------------------------------------------------------------------------------------------------------------------------------------------------------------------------------------------------------------------------|-------------------------------------------------------------------------------------------------------------------------------------------------------------------------------------------------------------------------------------------------------------------------------------------------------------------------------------------------------------------------------------------------------------------------------------------------------------------------------------------------------------------------------------------------------------------------------------------------------------------------------------------------------------------------------------------------------------------------------------------------------------------------------------------------------------------------------------------------------------------------------------------------------------------------------------------------------------------------------------------------------------------------------------------------------------------------------------------------|-------------------------------------------------------------------------------------------------------------------------------------------------------------------------------------------------------------------------------------------------------------------------------------------------------------------------------------------------------------------------------------------------------------------------------------------------------------------------------------------------------------------------------------------------------------------------------------------------------------------------------------------------------------------------------------------------------------------------------------------------------------------|
|    |    |       |      |                                                                                                                                                                                                                                                                                                                                                                                                                                    | nanoparticle (28.52, 1.0E-4); multiwalled carbon nanotube (27.55, 1.0E-4); wastewater treatment (26.27, 1.0E-4); double hydroxide (25.68, 1.0E-4); coagulation behavior (25.68, 1.0E-4); theoretical calculation study (25.68, 1.0E-4); metal oxide nanoparticle (25.14, 1.0E-4); zinc oxide nanoparticle (24.82, 1.0E-4); inorganic nanoparticle (23.7, 1.0E-4); graphene oxide (22.46, 1.0E-4); natural water (21.29, 1.0E-4)                                                                                                                                                                                                                                                                                                                                                                                                                                                                                                                                                                                                                                                                 | thermophila (0.42); nanoscale metal oxide (0.42); synergistic toxic effect (0.42); polyaromatic hydrocarbon (0.42); direct feeding (0.42); bacterial community structure (0.42); different release scenario (0.42); double hydroxide (0.4); coagulation behavior (0.4); theoretical calculation study (0.4); wavelength dependency (0.4); sativus I (0.4); diesel soot (0.4); part 2-toxicity (0.4); product characterization (0.4)                                                                                                                                                                                                                                                                                                                               |
| 11 | 19 | 0.982 | 2009 | silver nanoparticles; inhibitory effects; dunaliella tertiolecta; chlorella vulgaris; nanomaterial environmental fate; modeling; gold nanoparticles; short-term effect; dependent ecotoxicity; bacterial toxicity   toxicity; overproduction; extracellular polymeric substances; enhanced resistance; nanomaterial environmental fate; modeling; gold nanoparticles; short-term effect; dependent ecotoxicity; bacterial toxicity | silver nanoparticle (586.08, 1.0E-4); coated silver nanoparticle (254.41, 1.0E-4); natural water (201.32, 1.0E-4); escherichia coli (180.97, 1.0E-4); bacterial activity (162.87, 1.0E-4); moderate silver concentration (158.15, 1.0E-4); wastewater treatment (154.88, 1.0E-4); cerium dioxide (153.44, 1.0E-4); detecting nanoparticulate silver (148.74, 1.0E-4); plasma-mass spectrometry (148.74, 1.0E-4); nanomaterial environmental fate (141.28, 1.0E-4); unique environmental risk (141.12, 1.0E-4); divalent electrolyte solution (140.94, 1.0E-4); modeling nanomaterial fate (139.37, 1.0E-4); research strategy (136.09, 1.0E-4); novel nanohybrid (136.09, 1.0E-4); aquatic system (133.48, 1.0E-4); particle properties (131.24, 1.0E-4); microbial communities (130.53, 1.0E-4); dissolution rate (126.39, 1.0E-4); ecotoxicology media (121.55, 1.0E-4); physical morphology (116.72, 1.0E-4); bacterial toxicity (116.72, 1.0E-4); typical nanomaterial (116.61, 1.0E-4); agrobacterium tumefaciens (111.9, 1.0E-4); using sophora flavescens nanoparticle (111.73, 1.0E-4); | ion release kinetics (0.56); semi-analytical model (0.56); low-temperature wgs reaction (0.56); ni-ceo2 catalyst (0.56); bulk counterpart (0.56); plasma mass spectrometry (0.56); fullerene df-1 (0.56); rgo core-shell nanocomposite (0.56); promoter effect (0.56); respiratory deposition (0.56); biological tissue (0.56); graphene-supported ni (0.56); radiosensitive mammalian cell (0.56); nonmonotonic retention (0.56); phytoremediation system (0.56); triazine-based pollutant (0.56); combined effect (0.56); using single particle (0.56); polyvinylpyrrolidone-coated silver nanoparticle (0.56); one-step approach (0.56); nano-scale tio2 (0.56); bacterial tactic response (0.5); silver sulfide nanomaterial (0.5); amino modification (0.5); |

|                                                                                                                                                                                                                                                                                                                                                                                                                                                                                                                                                                                                                                                                                                                                                                                                                                                                                                                                                                                                                                                                                                                                                                                                                                                                                                                                                                                                                                                                                                                                                                                                                                                                                                           |                                                                                                                                                                                                                                                                                                                                                                                                                                                                                                                                                                                                                                                                                                                                                                                                                                                                                                                                                                                                                                                                                                                                                                                                                                               |
|-----------------------------------------------------------------------------------------------------------------------------------------------------------------------------------------------------------------------------------------------------------------------------------------------------------------------------------------------------------------------------------------------------------------------------------------------------------------------------------------------------------------------------------------------------------------------------------------------------------------------------------------------------------------------------------------------------------------------------------------------------------------------------------------------------------------------------------------------------------------------------------------------------------------------------------------------------------------------------------------------------------------------------------------------------------------------------------------------------------------------------------------------------------------------------------------------------------------------------------------------------------------------------------------------------------------------------------------------------------------------------------------------------------------------------------------------------------------------------------------------------------------------------------------------------------------------------------------------------------------------------------------------------------------------------------------------------------|-----------------------------------------------------------------------------------------------------------------------------------------------------------------------------------------------------------------------------------------------------------------------------------------------------------------------------------------------------------------------------------------------------------------------------------------------------------------------------------------------------------------------------------------------------------------------------------------------------------------------------------------------------------------------------------------------------------------------------------------------------------------------------------------------------------------------------------------------------------------------------------------------------------------------------------------------------------------------------------------------------------------------------------------------------------------------------------------------------------------------------------------------------------------------------------------------------------------------------------------------|
| <p>anaerobic digestion (111.43, 1.0E-4); humid airflow (107.09, 1.0E-4); short-term effect (107.09, 1.0E-4); nh4 reduction (102.28, 1.0E-4); nano-magnesium oxide particle (97.49, 1.0E-4); manufactured ag nanoparticle (92.71, 1.0E-4); long-term transformation (92.71, 1.0E-4); modeling nanosilver transformation (87.94, 1.0E-4); aquatic microcosm (84.21, 1.0E-4); ag nanoparticle (84.21, 1.0E-4); abiotic interaction (84.21, 1.0E-4); effective effluent treatment (83.18, 1.0E-4); enhanced resistance (78.43, 1.0E-4); extracellular polymeric substance (78.43, 1.0E-4); gold nanoparticle (75.86, 1.0E-4); suwannee river (75.2, 1.0E-4); natural organic matter alter (73.7, 1.0E-4); ionic strength (70.59, 1.0E-4); prokaryotic system (68.99, 1.0E-4); mass concentration (68.99, 1.0E-4); total surface area (68.99, 1.0E-4); graphene oxide (68.57, 1.0E-4); bacillus subtilis (65.49, 1.0E-4); toxicity effect (60.61, 1.0E-4); carbon nanotube (59.97, 1.0E-4); anti-bacterial performance (59.62, 1.0E-4); natural water condition (59.62, 1.0E-4); different polymer (59.62, 1.0E-4); porous media (57.05, 1.0E-4); bacterial fouling (54.97, 1.0E-4); microfiltration membrane (54.97, 1.0E-4); silver nanoparticle modification (54.97, 1.0E-4); aggregation kinetics (52.98, 1.0E-4); environmental transformation (50.35, 1.0E-4); situ study (50.35, 1.0E-4); zerovalent iron (49.11, 1.0E-4); adsorbed polymer (45.75, 1.0E-4); nano scale (45.75, 1.0E-4); nonsize measurement (44.4, 1.0E-4); titanium dioxide (43.19, 1.0E-4); nanoparticulate ceo2 (39.73, 1.0E-4); physico-chemical behaviour (39.73, 1.0E-4); multi-walled carbon nanotube (37.68, 1.0E-4); tio2</p> | <p>magna straus (0.5); physiochemical properties (0.5); electrochemical filter (0.5); siberian sturgeon (0.5); test media (0.5); nitrogen-fixing bacteria (0.5); potential toxicity (0.5); oxide-based nanomaterial (0.5); common aqueous antibiotic tetracycline (0.5); juvenile carp (0.5); cnt size (0.5); organic carbon (0.5); aquatic chemistry (0.5); sludge digestion (0.47); polymer-stabilised nanoparticle (0.47); soil mixture (0.47); pilot wastewater treatment plant (0.47); bone marrow cell (0.47); colloidal sio2 (0.47); double-layer compression (0.47); illumination mode (0.47); environmental effect (0.47); swiss-webster mice (0.47); size characterization (0.47); containing waste incineration residue (0.47); histopathological effect (0.47); bulk zno (0.47); titanium nitride nanotube (0.47); free-living nematode caenorhabditis elegans (0.47); charge neutralization (0.47); electrochemical capacitive energy storage (0.47); coaxial array (0.47); multi-angle light scattering (0.47); methyl violet (0.47); field-flow fractionation (0.47); asymmetrical flow (0.47); comparative phototoxicity (0.47); electrolyte species (0.47); commercial tio2 nanoparticle (0.47); explicit fate modelling</p> |
|-----------------------------------------------------------------------------------------------------------------------------------------------------------------------------------------------------------------------------------------------------------------------------------------------------------------------------------------------------------------------------------------------------------------------------------------------------------------------------------------------------------------------------------------------------------------------------------------------------------------------------------------------------------------------------------------------------------------------------------------------------------------------------------------------------------------------------------------------------------------------------------------------------------------------------------------------------------------------------------------------------------------------------------------------------------------------------------------------------------------------------------------------------------------------------------------------------------------------------------------------------------------------------------------------------------------------------------------------------------------------------------------------------------------------------------------------------------------------------------------------------------------------------------------------------------------------------------------------------------------------------------------------------------------------------------------------------------|-----------------------------------------------------------------------------------------------------------------------------------------------------------------------------------------------------------------------------------------------------------------------------------------------------------------------------------------------------------------------------------------------------------------------------------------------------------------------------------------------------------------------------------------------------------------------------------------------------------------------------------------------------------------------------------------------------------------------------------------------------------------------------------------------------------------------------------------------------------------------------------------------------------------------------------------------------------------------------------------------------------------------------------------------------------------------------------------------------------------------------------------------------------------------------------------------------------------------------------------------|

|    |    |       |      |                                                   |                                                                                                                                                                                                                                                                                                                                                                                                                                                                                                                                                                                                                                                                                                                                                                                                                                                                                                                                                                                                                                                                                                                                                                                                                         |                                                                                                                                                                                                                                                                                                                                                                                                                                                                                                                                                                                                                                                                                                                                                                                                                                                                                                                                                                                                                                                                                                                     |
|----|----|-------|------|---------------------------------------------------|-------------------------------------------------------------------------------------------------------------------------------------------------------------------------------------------------------------------------------------------------------------------------------------------------------------------------------------------------------------------------------------------------------------------------------------------------------------------------------------------------------------------------------------------------------------------------------------------------------------------------------------------------------------------------------------------------------------------------------------------------------------------------------------------------------------------------------------------------------------------------------------------------------------------------------------------------------------------------------------------------------------------------------------------------------------------------------------------------------------------------------------------------------------------------------------------------------------------------|---------------------------------------------------------------------------------------------------------------------------------------------------------------------------------------------------------------------------------------------------------------------------------------------------------------------------------------------------------------------------------------------------------------------------------------------------------------------------------------------------------------------------------------------------------------------------------------------------------------------------------------------------------------------------------------------------------------------------------------------------------------------------------------------------------------------------------------------------------------------------------------------------------------------------------------------------------------------------------------------------------------------------------------------------------------------------------------------------------------------|
|    |    |       |      | 5                                                 | nanoparticle (37.26, 1.0E-4); microbial community structure (35.09, 1.0E-4); comparative study (32.85, 1.0E-4); single-walled carbon nanotube (30.68, 1.0E-4); bacterial inactivation (30.49, 1.0E-4); aquatic media (30.49, 1.0E-4); specific ion (30.49, 1.0E-4); silver nanoparticle stability (30.49, 1.0E-4); aquatic environment (30.08, 1.0E-4); dependent ecotoxicity (25.94, 1.0E-4); organo-coated silver nanoparticle (25.94, 1.0E-4); observed toxicity (25.94, 1.0E-4); part 2-toxicity (25.09, 1.0E-4); natural organic matter (23.89, 1.0E-4); aqueous solution (23.84, 1.0E-4); danio rerio (23.79, 1.0E-4); solution chemistry (23.27, 1.0E-4); metallic nanoparticle (21.46, 1.0E-4); cuo sulfidation yield (21.46, 1.0E-4); green algae (20.07, 1.0E-4); dunaliella tertiolecta (20.07, 1.0E-4); chlorella vulgaris (20.07, 1.0E-4); inhibitory effect (20.07, 1.0E-4); ag speciation (19.85, 1.0E-4); engineered nanoparticle (19.1, 1.0E-4); inorganic nanomaterial (18.53, 1.0E-4); titanium dioxide nanoparticle (18.5, 1.0E-4); daphnia magna (18.04, 1.0E-4); multiwalled carbon nanotube (17.61, 1.0E-4); fullerene nanoparticle (17.53, 1.0E-4); graphene oxide nanomaterial (17.53, 1.0E-4) | (0.47); green algae (0.45); dunaliella tertiolecta (0.45); chlorella vulgaris (0.45); inhibitory effect (0.45); characterization factor (0.45); seventeen subcontinental freshwater (0.45); sorption behavior (0.45); field study (0.45); natural soil system (0.45); microwave-induced carbon nanotube (0.45); agcl nanoparticle (0.45); ceriodaphnia dubia (0.45); urban soil (0.45); using different reducing agent (0.45); mediating c-60 phototransformation (0.45); surface complexation modeling (0.45); screening evaluation (0.45); methodological consideration (0.45); sewer system (0.45); vitro test (0.45); tetrahymena thermophila (0.45); nanoscale metal oxide (0.45); synergistic toxic effect (0.45); reduced graphene oxide material (0.45); polyaromatic hydrocarbon (0.45); direct feeding (0.45); bacterial community structure (0.45); different release scenario (0.45); part 2-toxicity (0.43); wavelength dependency (0.43); sativus l (0.43); diesel soot (0.43); product characterization (0.43); anatase nanoparticle (0.43); tio2 nanomaterial (0.43); geochemical reactivity (0.43) |
| 12 | 17 | 0.968 | 2009 | engineered nanomaterials; environmental exposure; | eisenia fetida (162.47, 1.0E-4); engineered nanomaterial (142.46, 1.0E-4); probabilistic material flow analysis (98.97,                                                                                                                                                                                                                                                                                                                                                                                                                                                                                                                                                                                                                                                                                                                                                                                                                                                                                                                                                                                                                                                                                                 | semi-analytical model (0.4); low-temperature wgs reaction (0.4); ni-ceo2 catalyst (0.4); bulk                                                                                                                                                                                                                                                                                                                                                                                                                                                                                                                                                                                                                                                                                                                                                                                                                                                                                                                                                                                                                       |

|  |  |                                                                                                                                                                                                                                                                                                                                                                                                                                   |                                                                                                                                                                                                                                                                                                                                                                                                                                                                                                                                                                                                                                                                                                                                                                                                                                                                                                                                                                                                                                                                                                                                                                                                                                                                                                                                                                                                                                                                                                                                                                                                                                                                                                                                                                                                                                                                                                                                                                                                           |                                                                                                                                                                                                                                                                                                                                                                                                                                                                                                                                                                                                                                                                                                                                                                                                                                                                                                                                                                                                                                                                                                                                                                                                                                                                                                                                                                                                                                                                                                             |
|--|--|-----------------------------------------------------------------------------------------------------------------------------------------------------------------------------------------------------------------------------------------------------------------------------------------------------------------------------------------------------------------------------------------------------------------------------------|-----------------------------------------------------------------------------------------------------------------------------------------------------------------------------------------------------------------------------------------------------------------------------------------------------------------------------------------------------------------------------------------------------------------------------------------------------------------------------------------------------------------------------------------------------------------------------------------------------------------------------------------------------------------------------------------------------------------------------------------------------------------------------------------------------------------------------------------------------------------------------------------------------------------------------------------------------------------------------------------------------------------------------------------------------------------------------------------------------------------------------------------------------------------------------------------------------------------------------------------------------------------------------------------------------------------------------------------------------------------------------------------------------------------------------------------------------------------------------------------------------------------------------------------------------------------------------------------------------------------------------------------------------------------------------------------------------------------------------------------------------------------------------------------------------------------------------------------------------------------------------------------------------------------------------------------------------------------------------------------------------------|-------------------------------------------------------------------------------------------------------------------------------------------------------------------------------------------------------------------------------------------------------------------------------------------------------------------------------------------------------------------------------------------------------------------------------------------------------------------------------------------------------------------------------------------------------------------------------------------------------------------------------------------------------------------------------------------------------------------------------------------------------------------------------------------------------------------------------------------------------------------------------------------------------------------------------------------------------------------------------------------------------------------------------------------------------------------------------------------------------------------------------------------------------------------------------------------------------------------------------------------------------------------------------------------------------------------------------------------------------------------------------------------------------------------------------------------------------------------------------------------------------------|
|  |  | <p>modeling;<br/> limitations;<br/> probabilistic<br/> material flow<br/> analysis;<br/> possibilities;<br/> paint;<br/> characterization;<br/> water; materials  <br/> fate; effects;<br/> eisenia fetida;<br/> nano aluminum<br/> oxide; primary<br/> wastewater<br/> treatment; pvp-<br/> capped silver<br/> nanoparticles;<br/> exploring<br/> controls; particle<br/> size; exposure<br/> modeling;<br/> biodistribution</p> | <p>1.0E-4); source water quality<br/> (98.35, 1.0E-4); multiwall<br/> carbon nanotube coagulation<br/> (98.35, 1.0E-4); nanowaste<br/> detection (97.45, 1.0E-4);<br/> heterotrophic wastewater<br/> biomass (96.59, 1.0E-4);<br/> environmental exposure (93.46,<br/> 1.0E-4); irish surface (93.16,<br/> 1.0E-4); regulatory system<br/> (93.16, 1.0E-4); nano-scale<br/> pollutant (93.16, 1.0E-4);<br/> drinking water (93.16, 1.0E-4);<br/> nanocopper removal (92.85,<br/> 1.0E-4); municipal wastewater<br/> (92.85, 1.0E-4); chemical<br/> speciation (89.76, 1.0E-4);<br/> physicochemical interaction<br/> (88.53, 1.0E-4); ecological<br/> perspective (85.35, 1.0E-4);<br/> freshwater food chain (82.39,<br/> 1.0E-4); copper nanoparticle<br/> (80.5, 1.0E-4); anabaena<br/> variabilis (78.01, 1.0E-4);<br/> intracellular nitrogen storage<br/> (78.01, 1.0E-4); nitrogen<br/> fixation rate (78.01, 1.0E-4);<br/> titanium dioxide nanomaterial<br/> (78.01, 1.0E-4); trophic transfer<br/> (77, 1.0E-4); rainbow trout cell<br/> line (70.7, 1.0E-4); comparative<br/> cytotoxicity study (70.7, 1.0E-<br/> 4); nano zinc-oxide (66.41,<br/> 1.0E-4); nano silver (66.41,<br/> 1.0E-4); temporal resolution<br/> (66.41, 1.0E-4); exploring<br/> control (64.77, 1.0E-4); pvp-<br/> capped silver nanoparticle<br/> (64.77, 1.0E-4); high-<br/> throughput screening (63.12,<br/> 1.0E-4); environmental factor<br/> (62.11, 1.0E-4); cerium dioxide<br/> nanoparticle translocation<br/> (61.81, 1.0E-4); maize plant<br/> (61.81, 1.0E-4); low biosorption<br/> (57.5, 1.0E-4); coated<br/> engineered magnetic<br/> nanoparticle (57.5, 1.0E-4);<br/> granular sludge (57.5, 1.0E-4);<br/> magnetic susceptibility (57.5,<br/> 1.0E-4); biological response<br/> (53.25, 1.0E-4); nano-scale<br/> titanium dioxide (53.25, 1.0E-<br/> 4); particle dose (53.25, 1.0E-<br/> 4); graphene oxide (50.73, 1.0E-4);<br/> analytical measurement (49.05,<br/> 1.0E-4); prognostic risk</p> | <p>counterpart (0.4);<br/> plasma mass<br/> spectrometry (0.4);<br/> fullerene df-1 (0.4); rgo<br/> core-shell<br/> nanocomposite (0.4);<br/> ion release kinetics<br/> (0.4); promoter effect<br/> (0.4); respiratory<br/> deposition (0.4);<br/> biological tissue (0.4);<br/> graphene-supported ni<br/> (0.4); radiosensitive<br/> mammalian cell (0.4);<br/> nonmonotonic retention<br/> (0.4); phytoremediation<br/> system (0.4); triazine-<br/> based pollutant (0.4);<br/> combined effect (0.4);<br/> using single particle<br/> (0.4);<br/> polyvinylpyrrolidone-<br/> coated silver<br/> nanoparticle (0.4); one-<br/> step approach (0.4);<br/> nano-scale tio2 (0.4);<br/> silver sulfide<br/> nanomaterial (0.36);<br/> bacterial tactic response<br/> (0.36); amino<br/> modification (0.36);<br/> magna straus (0.36);<br/> physiochemical<br/> properties (0.36);<br/> electrochemical filter<br/> (0.36); siberian<br/> sturgeon (0.36); test<br/> media (0.36); nitrogen-<br/> fixing bacteria (0.36);<br/> potential toxicity (0.36);<br/> oxide-based<br/> nanomaterial (0.36);<br/> common aqueous<br/> antibiotic tetracycline<br/> (0.36); juvenile carp<br/> (0.36); cnt size (0.36);<br/> organic carbon (0.36);<br/> aquatic chemistry<br/> (0.36); bone marrow<br/> cell (0.33); colloidal<br/> sio2 (0.33); double-<br/> layer compression<br/> (0.33); illumination<br/> mode (0.33); sludge<br/> digestion (0.33);<br/> environmental effect<br/> (0.33); swiss-webster</p> |
|--|--|-----------------------------------------------------------------------------------------------------------------------------------------------------------------------------------------------------------------------------------------------------------------------------------------------------------------------------------------------------------------------------------------------------------------------------------|-----------------------------------------------------------------------------------------------------------------------------------------------------------------------------------------------------------------------------------------------------------------------------------------------------------------------------------------------------------------------------------------------------------------------------------------------------------------------------------------------------------------------------------------------------------------------------------------------------------------------------------------------------------------------------------------------------------------------------------------------------------------------------------------------------------------------------------------------------------------------------------------------------------------------------------------------------------------------------------------------------------------------------------------------------------------------------------------------------------------------------------------------------------------------------------------------------------------------------------------------------------------------------------------------------------------------------------------------------------------------------------------------------------------------------------------------------------------------------------------------------------------------------------------------------------------------------------------------------------------------------------------------------------------------------------------------------------------------------------------------------------------------------------------------------------------------------------------------------------------------------------------------------------------------------------------------------------------------------------------------------------|-------------------------------------------------------------------------------------------------------------------------------------------------------------------------------------------------------------------------------------------------------------------------------------------------------------------------------------------------------------------------------------------------------------------------------------------------------------------------------------------------------------------------------------------------------------------------------------------------------------------------------------------------------------------------------------------------------------------------------------------------------------------------------------------------------------------------------------------------------------------------------------------------------------------------------------------------------------------------------------------------------------------------------------------------------------------------------------------------------------------------------------------------------------------------------------------------------------------------------------------------------------------------------------------------------------------------------------------------------------------------------------------------------------------------------------------------------------------------------------------------------------|

|  |                                                                                                                                                                                                                                                                                                                                                                                                                                                                                                                                                                                                                                                                                                                                                                                                                                                                                                                                                                                                                                                                                                                                                                                                                                                                                                                                                                                                                                                                                                                                                                                                                                                                                                                                                  |                                                                                                                                                                                                                                                                                                                                                                                                                                                                                                                                                                                                                                                                                                                                                                                                                                                                                                                                                                                                                                                                                                                                                                                                                                         |
|--|--------------------------------------------------------------------------------------------------------------------------------------------------------------------------------------------------------------------------------------------------------------------------------------------------------------------------------------------------------------------------------------------------------------------------------------------------------------------------------------------------------------------------------------------------------------------------------------------------------------------------------------------------------------------------------------------------------------------------------------------------------------------------------------------------------------------------------------------------------------------------------------------------------------------------------------------------------------------------------------------------------------------------------------------------------------------------------------------------------------------------------------------------------------------------------------------------------------------------------------------------------------------------------------------------------------------------------------------------------------------------------------------------------------------------------------------------------------------------------------------------------------------------------------------------------------------------------------------------------------------------------------------------------------------------------------------------------------------------------------------------|-----------------------------------------------------------------------------------------------------------------------------------------------------------------------------------------------------------------------------------------------------------------------------------------------------------------------------------------------------------------------------------------------------------------------------------------------------------------------------------------------------------------------------------------------------------------------------------------------------------------------------------------------------------------------------------------------------------------------------------------------------------------------------------------------------------------------------------------------------------------------------------------------------------------------------------------------------------------------------------------------------------------------------------------------------------------------------------------------------------------------------------------------------------------------------------------------------------------------------------------|
|  | <p>assessment (48.61, 1.0E-4); nonmetallic nanoparticle (48.47, 1.0E-4); particle size (47.99, 1.0E-4); terrestrial earthworm (47.46, 1.0E-4); aquatic ecosystem (47.32, 1.0E-4); charge behavior (45.65, 1.0E-4); micron-sized aluminum oxide (45.54, 1.0E-4); nano aluminum oxide (44.73, 1.0E-4); porous media (42.21, 1.0E-4); environmental concentration (37.52, 1.0E-4); atmospheric transformation (37.2, 1.0E-4); humic acid (34.72, 1.0E-4); au nanoparticle (33.86, 1.0E-4); surface water (33.08, 1.0E-4); modeling flow (32.3, 1.0E-4); carbon nanotube (30.95, 1.0E-4); danish environment (28.11, 1.0E-4); weighted distribution (27.98, 1.0E-4); carbonaceous nanoparticle (27.87, 1.0E-4); annual metal load (27.36, 1.0E-4); species sensitivity (24.85, 1.0E-4); natural organic matter (23.37, 1.0E-4); consumer product (23.24, 1.0E-4); ecological risk assessment (22.52, 1.0E-4); n-tio2 case study (22.52, 1.0E-4); solution chemistry (22.43, 1.0E-4); single-walled carbon nanotube (21.24, 1.0E-4); wastewater treatment (20.66, 1.0E-4); dietary exposure (17.79, 1.0E-4); adult male zebrafish (17.79, 1.0E-4); titanium dioxide (17.64, 1.0E-4); aqueous solution (17.64, 1.0E-4); multi-walled carbon nanotube (16.31, 1.0E-4); artificial sweat (15.01, 0.001); physical stress (15.01, 0.001); aquatic environment (14.36, 0.001); daphnia magna (13.35, 0.001); fullerene nanoparticle (12.97, 0.001); graphene oxide nanomaterial (12.97, 0.001); urban soil (12.42, 0.001); vitro test (12.42, 0.001); engineered nanoparticle (12.15, 0.001); exposure modeling (11.81, 0.001); geochemical reactivity (10.32, 0.005); single extraction method (10.32, 0.005); human bioaccessibility (10.32, 0.005);</p> | <p>mice (0.33); size characterization (0.33); containing waste incineration residue (0.33); histopathological effect (0.33); bulk zno (0.33); titanium nitride nanotube (0.33); free-living nematode caenorhabditis elegans (0.33); polymer-stabilised nanoparticle (0.33); soil mixture (0.33); pilot wastewater treatment plant (0.33); charge neutralization (0.33); electrochemical capacitive energy storage (0.33); coaxial array (0.33); multi-angle light scattering (0.33); methyl violet (0.33); field-flow fractionation (0.33); asymmetrical flow (0.33); comparative phototoxicity (0.33); electrolyte species (0.33); commercial tio2 nanoparticle (0.33); explicit fate modelling (0.33); urban soil (0.32); vitro test (0.32); bacterial community structure (0.32); screening evaluation (0.32); methodological consideration (0.32); nanoscale metal oxide (0.32); characterization factor (0.32); seventeen subcontinental freshwater (0.32); sorption behavior (0.32); field study (0.32); natural soil system (0.32); green algae (0.32); microwave-induced carbon nanotube (0.32); agcl nanoparticle (0.32); ceriodaphnia dubia (0.32); using different reducing agent (0.32); dunaliella tertiolecta (0.32);</p> |
|--|--------------------------------------------------------------------------------------------------------------------------------------------------------------------------------------------------------------------------------------------------------------------------------------------------------------------------------------------------------------------------------------------------------------------------------------------------------------------------------------------------------------------------------------------------------------------------------------------------------------------------------------------------------------------------------------------------------------------------------------------------------------------------------------------------------------------------------------------------------------------------------------------------------------------------------------------------------------------------------------------------------------------------------------------------------------------------------------------------------------------------------------------------------------------------------------------------------------------------------------------------------------------------------------------------------------------------------------------------------------------------------------------------------------------------------------------------------------------------------------------------------------------------------------------------------------------------------------------------------------------------------------------------------------------------------------------------------------------------------------------------|-----------------------------------------------------------------------------------------------------------------------------------------------------------------------------------------------------------------------------------------------------------------------------------------------------------------------------------------------------------------------------------------------------------------------------------------------------------------------------------------------------------------------------------------------------------------------------------------------------------------------------------------------------------------------------------------------------------------------------------------------------------------------------------------------------------------------------------------------------------------------------------------------------------------------------------------------------------------------------------------------------------------------------------------------------------------------------------------------------------------------------------------------------------------------------------------------------------------------------------------|

|    |    |       |      |                                                                                                                                                                                                                                                                                                                                                                                                                                                       |                                                                                                                                                                                                                                                                                                                                                                                                                                                                                                                                                                                                                                                                                                                                                                                                                                                                                              |                                                                                                                                                                                                                                                                                                                                                                                                                                                                                                                                                                                                                                     |
|----|----|-------|------|-------------------------------------------------------------------------------------------------------------------------------------------------------------------------------------------------------------------------------------------------------------------------------------------------------------------------------------------------------------------------------------------------------------------------------------------------------|----------------------------------------------------------------------------------------------------------------------------------------------------------------------------------------------------------------------------------------------------------------------------------------------------------------------------------------------------------------------------------------------------------------------------------------------------------------------------------------------------------------------------------------------------------------------------------------------------------------------------------------------------------------------------------------------------------------------------------------------------------------------------------------------------------------------------------------------------------------------------------------------|-------------------------------------------------------------------------------------------------------------------------------------------------------------------------------------------------------------------------------------------------------------------------------------------------------------------------------------------------------------------------------------------------------------------------------------------------------------------------------------------------------------------------------------------------------------------------------------------------------------------------------------|
|    |    |       |      |                                                                                                                                                                                                                                                                                                                                                                                                                                                       | water purification (9.82, 0.005); ceo2 nanoparticle (9.56, 0.005); organic matter (8.18, 0.005); coated silver nanoparticle (8.18, 0.005); multiwalled carbon nanotube (8.09, 0.005); anaerobic digestion (7.92, 0.005); adverse effect (7.8, 0.01); theoretical studies (7.42, 0.01); carbon nanomaterial (7.3, 0.01); natural water (7.21, 0.01)                                                                                                                                                                                                                                                                                                                                                                                                                                                                                                                                           | mediating c-60 phototransformation (0.32); chlorella vulgaris (0.32); surface complexation modeling (0.32); sewer system (0.32); inhibitory effect (0.32); tetrahymena thermophila (0.32); synergistic toxic effect (0.32); reduced graphene oxide material (0.32); polyaromatic hydrocarbon (0.32); direct feeding (0.32); different release scenario (0.32); geochemical reactivity (0.3); single extraction method (0.3); human bioaccessibility (0.3); sativus I (0.3); anatase nanoparticle (0.3); pure anatase (0.3); wheat seedling (0.3); wavelength dependency (0.3)                                                       |
| 13 | 16 | 0.982 | 2013 | graphene oxide; heteroaggregation; influence; nanohybrid aggregation; microparticle sedimentation; micrometer-sized hematite colloids; oxide-coated sand columns; colloidal properties; single-layered graphene oxide nanosheets; quartz   transport; porous media; effects; temperature; graphene oxide deposition; environmental concentrations; molecular mechanisms; developmental toxicity; nanohybrid aggregation; al layered double hydroxides | graphene oxide (1435.59, 1.0E-4); theoretical studies (300.52, 1.0E-4); graphene oxide nanomaterial (287.96, 1.0E-4); graphene oxide nanoparticle (262.15, 1.0E-4); carbon dot (222.28, 1.0E-4); natural mineral (177.91, 1.0E-4); natural surface water (177.64, 1.0E-4); key factor (177.64, 1.0E-4); kaolinite colloid (172.07, 1.0E-4); cation-inhibited transport (167, 1.0E-4); hofmeister effect (167, 1.0E-4); porous media (161.76, 1.0E-4); graphene oxide interaction (161.38, 1.0E-4); counterion effect (161.38, 1.0E-4); natural organic matter properties (155.76, 1.0E-4); assessing stability (149.83, 1.0E-4); enhanced dehydrochlorination (144.54, 1.0E-4); graphene-based nanomaterial (144.54, 1.0E-4); oxide-coated sand (138.93, 1.0E-4); nanohybrid aggregation (133.33, 1.0E-4); micrometer-sized hematite colloid (133.33, 1.0E-4); new insight (127.73, 1.0E-4); | semi-analytical model (0.39); low-temperature wgs reaction (0.39); ni-ceo2 catalyst (0.39); bulk counterpart (0.39); plasma mass spectrometry (0.39); fullerene df-1 (0.39); rgo core-shell nanocomposite (0.39); ion release kinetics (0.39); promoter effect (0.39); respiratory deposition (0.39); biological tissue (0.39); graphene-supported ni (0.39); radiosensitive mammalian cell (0.39); nonmonotonic retention (0.39); phytoremediation system (0.39); triazine-based pollutant (0.39); combined effect (0.39); using single particle (0.39); polyvinylpyrrolidone-coated silver nanoparticle (0.39); one-step approach |

|  |                                                                                                                                                                                                                                                                                                                                                                                                                                                                                                                                                                                                                                                                                                                                                                                                                                                                                                                                                                                                                                                                                                                                                                                                                                                                                                                                                                                                                                                                                                                                                                                                                                                                                                                                              |                                                                                                                                                                                                                                                                                                                                                                                                                                                                                                                                                                                                                                                                                                                                                                                                                                                                                                                                                                                                                                                                                                                                                                                                                                                          |
|--|----------------------------------------------------------------------------------------------------------------------------------------------------------------------------------------------------------------------------------------------------------------------------------------------------------------------------------------------------------------------------------------------------------------------------------------------------------------------------------------------------------------------------------------------------------------------------------------------------------------------------------------------------------------------------------------------------------------------------------------------------------------------------------------------------------------------------------------------------------------------------------------------------------------------------------------------------------------------------------------------------------------------------------------------------------------------------------------------------------------------------------------------------------------------------------------------------------------------------------------------------------------------------------------------------------------------------------------------------------------------------------------------------------------------------------------------------------------------------------------------------------------------------------------------------------------------------------------------------------------------------------------------------------------------------------------------------------------------------------------------|----------------------------------------------------------------------------------------------------------------------------------------------------------------------------------------------------------------------------------------------------------------------------------------------------------------------------------------------------------------------------------------------------------------------------------------------------------------------------------------------------------------------------------------------------------------------------------------------------------------------------------------------------------------------------------------------------------------------------------------------------------------------------------------------------------------------------------------------------------------------------------------------------------------------------------------------------------------------------------------------------------------------------------------------------------------------------------------------------------------------------------------------------------------------------------------------------------------------------------------------------------|
|  | <p>verwey-overbeek theory (127.73, 1.0E-4); clay mineral (122.13, 1.0E-4); concurrent agglomeration (116.54, 1.0E-4); 14-labeled few-layer graphene (111.12, 1.0E-4); correlating morphology (110.96, 1.0E-4); aggregation behavior (105.62, 1.0E-4); co-existing kaolinite (105.38, 1.0E-4); surface chemistry (101.25, 1.0E-4); granular quartz sand (99.8, 1.0E-4); silver nanoparticle (94.68, 1.0E-4); heavy metal ion (94.23, 1.0E-4); synergistic coagulation (94.23, 1.0E-4); secondary adsorption (94.23, 1.0E-4); al layered double hydroxide (89.19, 1.0E-4); graphene oxide deposition (88.67, 1.0E-4); freshwater ecotoxicity (83.12, 1.0E-4); deriving characterization factor (83.12, 1.0E-4); deposition behavior (77.57, 1.0E-4); containing different metal cation (72.04, 1.0E-4); morphological transformation (72.04, 1.0E-4); facilitated bioaccumulation (66.51, 1.0E-4); remission mechanism (66.51, 1.0E-4); common carp (66.51, 1.0E-4); oxide-coated sand column (61, 1.0E-4); single-layered graphene oxide nanosheet (61, 1.0E-4); cyprinus carpio (58.52, 1.0E-4); molecular mechanism (55.5, 1.0E-4); engineered nanomaterial (47.4, 1.0E-4); bacillus subtilis (44.96, 1.0E-4); graphene concentration (44.55, 1.0E-4); colloidal properties (44.55, 1.0E-4); few-layer graphene (44.55, 1.0E-4); tio2 nanoparticle (40.61, 1.0E-4); titanium dioxide (36.78, 1.0E-4); antibacterial property (33.7, 1.0E-4); oxidation debris (30.08, 1.0E-4); natural organic matter (29.65, 1.0E-4); efficient adsorption (28.32, 1.0E-4); oxide-manganese dioxide (28.32, 1.0E-4); single-walled carbon nanotube (27.43, 1.0E-4); multi-walled carbon nanotube (27.07, 1.0E-4); fulvic acid (26.42, 1.0E-4); genuine</p> | <p>(0.39); nano-scale tio2 (0.39); oxide-based nanomaterial (0.35); silver sulfide nanomaterial (0.35); bacterial tactic response (0.35); amino modification (0.35); magna straus (0.35); physiochemical properties (0.35); electrochemical filter (0.35); siberian sturgeon (0.35); test media (0.35); nitrogen-fixing bacteria (0.35); potential toxicity (0.35); common aqueous antibiotic tetracycline (0.35); juvenile carp (0.35); cnt size (0.35); organic carbon (0.35); aquatic chemistry (0.35); colloidal sio2 (0.32); bone marrow cell (0.32); double-layer compression (0.32); illumination mode (0.32); sludge digestion (0.32); environmental effect (0.32); swiss-webster mice (0.32); size characterization (0.32); containing waste incineration residue (0.32); histopathological effect (0.32); bulk zno (0.32); titanium nitride nanotube (0.32); free-living nematode caenorhabditis elegans (0.32); polymer-stabilised nanoparticle (0.32); soil mixture (0.32); pilot wastewater treatment plant (0.32); charge neutralization (0.32); electrochemical capacitive energy storage (0.32); coaxial array (0.32); multi-angle light scattering (0.32); methyl violet (0.32); field-flow fractionation (0.32); asymmetrical flow</p> |
|--|----------------------------------------------------------------------------------------------------------------------------------------------------------------------------------------------------------------------------------------------------------------------------------------------------------------------------------------------------------------------------------------------------------------------------------------------------------------------------------------------------------------------------------------------------------------------------------------------------------------------------------------------------------------------------------------------------------------------------------------------------------------------------------------------------------------------------------------------------------------------------------------------------------------------------------------------------------------------------------------------------------------------------------------------------------------------------------------------------------------------------------------------------------------------------------------------------------------------------------------------------------------------------------------------------------------------------------------------------------------------------------------------------------------------------------------------------------------------------------------------------------------------------------------------------------------------------------------------------------------------------------------------------------------------------------------------------------------------------------------------|----------------------------------------------------------------------------------------------------------------------------------------------------------------------------------------------------------------------------------------------------------------------------------------------------------------------------------------------------------------------------------------------------------------------------------------------------------------------------------------------------------------------------------------------------------------------------------------------------------------------------------------------------------------------------------------------------------------------------------------------------------------------------------------------------------------------------------------------------------------------------------------------------------------------------------------------------------------------------------------------------------------------------------------------------------------------------------------------------------------------------------------------------------------------------------------------------------------------------------------------------------|

|  |                                                                                                                                                                                                                                                                                                                                                                                                                                                                                                                                                                                                                                                                                                                                                                                                                                                                                                                                                                                                                                                                                                                                                                                                                                                                                                                                                                                                            |                                                                                                                                                                                                                                                                                                                                                                                                                                                                                                                                                                                                                                                                                                                                                                                                                                                                                                                                                                                                                                                                                                                                                                                                    |
|--|------------------------------------------------------------------------------------------------------------------------------------------------------------------------------------------------------------------------------------------------------------------------------------------------------------------------------------------------------------------------------------------------------------------------------------------------------------------------------------------------------------------------------------------------------------------------------------------------------------------------------------------------------------------------------------------------------------------------------------------------------------------------------------------------------------------------------------------------------------------------------------------------------------------------------------------------------------------------------------------------------------------------------------------------------------------------------------------------------------------------------------------------------------------------------------------------------------------------------------------------------------------------------------------------------------------------------------------------------------------------------------------------------------|----------------------------------------------------------------------------------------------------------------------------------------------------------------------------------------------------------------------------------------------------------------------------------------------------------------------------------------------------------------------------------------------------------------------------------------------------------------------------------------------------------------------------------------------------------------------------------------------------------------------------------------------------------------------------------------------------------------------------------------------------------------------------------------------------------------------------------------------------------------------------------------------------------------------------------------------------------------------------------------------------------------------------------------------------------------------------------------------------------------------------------------------------------------------------------------------------|
|  | <p>autophagy (23, 1.0E-4); developmental toxicity (22.92, 1.0E-4); engineered nanoparticle (22.27, 1.0E-4); titanium dioxide nanoparticle (21.78, 1.0E-4); multiwalled carbon nanotube (21.05, 1.0E-4); wastewater treatment (20.07, 1.0E-4); metal oxide nanoparticle (19.21, 1.0E-4); zinc oxide nanoparticle (18.96, 1.0E-4); inorganic nanoparticle (18.1, 1.0E-4); modeling analyses (17.74, 1.0E-4); solution chemistry (17.09, 1.0E-4); natural water (16.27, 1.0E-4); environmental concentration (15.48, 1.0E-4); daphnia magna (12.96, 0.001); using different reducing agent (12.59, 0.001); reduced graphene oxide material (12.59, 0.001); fullerene nanoparticle (12.59, 0.001); arabidopsis thaliana (12.22, 0.001); zno nanoparticle (11.98, 0.001); gold nanoparticle (11.98, 0.001); particle size (11.74, 0.001); aggregation kinetics (11.36, 0.001); surface water (10.27, 0.005); eisenia fetida (10.14, 0.005); c-60 fullerene (10.02, 0.005); aqueous suspension (9.64, 0.005); water purification (9.53, 0.005); ceo2 nanoparticle (9.28, 0.005); environmental exposure (9.28, 0.005); silver ion (9.04, 0.005); probabilistic material flow analysis (8.67, 0.005); source water quality (8.19, 0.005); multiwall carbon nanotube coagulation (8.19, 0.005); organic matter (7.94, 0.005); coated silver nanoparticle (7.94, 0.005); earthworm eisenia fetida (7.94, 0.005)</p> | <p>(0.32); comparative phototoxicity (0.32); electrolyte species (0.32); commercial tio2 nanoparticle (0.32); explicit fate modelling (0.32); using different reducing agent (0.31); reduced graphene oxide material (0.31); characterization factor (0.31); seventeen subcontinental freshwater (0.31); sorption behavior (0.31); field study (0.31); natural soil system (0.31); green algae (0.31); microwave-induced carbon nanotube (0.31); agcl nanoparticle (0.31); ceriodaphnia dubia (0.31); urban soil (0.31); dunaliella tertiolecta (0.31); mediating c-60 phototransformation (0.31); chlorella vulgaris (0.31); surface complexation modeling (0.31); screening evaluation (0.31); methodological consideration (0.31); sewer system (0.31); inhibitory effect (0.31); vitro test (0.31); tetrahymena thermophila (0.31); nanoscale metal oxide (0.31); synergistic toxic effect (0.31); polyaromatic hydrocarbon (0.31); direct feeding (0.31); bacterial community structure (0.31); different release scenario (0.31); modeling analyses (0.29); wavelength dependency (0.29); sativus I (0.29); diesel soot (0.29); part 2-toxicity (0.29); product characterization (0.29);</p> |
|--|------------------------------------------------------------------------------------------------------------------------------------------------------------------------------------------------------------------------------------------------------------------------------------------------------------------------------------------------------------------------------------------------------------------------------------------------------------------------------------------------------------------------------------------------------------------------------------------------------------------------------------------------------------------------------------------------------------------------------------------------------------------------------------------------------------------------------------------------------------------------------------------------------------------------------------------------------------------------------------------------------------------------------------------------------------------------------------------------------------------------------------------------------------------------------------------------------------------------------------------------------------------------------------------------------------------------------------------------------------------------------------------------------------|----------------------------------------------------------------------------------------------------------------------------------------------------------------------------------------------------------------------------------------------------------------------------------------------------------------------------------------------------------------------------------------------------------------------------------------------------------------------------------------------------------------------------------------------------------------------------------------------------------------------------------------------------------------------------------------------------------------------------------------------------------------------------------------------------------------------------------------------------------------------------------------------------------------------------------------------------------------------------------------------------------------------------------------------------------------------------------------------------------------------------------------------------------------------------------------------------|



|    |    |       |      |                                                                                                                                                                                                                                                                                                                                                                                                       |                                                                                                                                                                                                                                                                                                                                                                                                                                                                                                                                                                                                                                                                                                                                                                                                                                                                                                                                                                                                                                                                                                                                                                                                                                                                                                                                                                                                                                                                                                                                                                                                                                                                   |                                                                                                                                                                                                                                                                                                                                                                                                                                                                                                                                                                                                                                                                                                                                                                                                                                                                                                                                                                                                                                                                                                                                                         |
|----|----|-------|------|-------------------------------------------------------------------------------------------------------------------------------------------------------------------------------------------------------------------------------------------------------------------------------------------------------------------------------------------------------------------------------------------------------|-------------------------------------------------------------------------------------------------------------------------------------------------------------------------------------------------------------------------------------------------------------------------------------------------------------------------------------------------------------------------------------------------------------------------------------------------------------------------------------------------------------------------------------------------------------------------------------------------------------------------------------------------------------------------------------------------------------------------------------------------------------------------------------------------------------------------------------------------------------------------------------------------------------------------------------------------------------------------------------------------------------------------------------------------------------------------------------------------------------------------------------------------------------------------------------------------------------------------------------------------------------------------------------------------------------------------------------------------------------------------------------------------------------------------------------------------------------------------------------------------------------------------------------------------------------------------------------------------------------------------------------------------------------------|---------------------------------------------------------------------------------------------------------------------------------------------------------------------------------------------------------------------------------------------------------------------------------------------------------------------------------------------------------------------------------------------------------------------------------------------------------------------------------------------------------------------------------------------------------------------------------------------------------------------------------------------------------------------------------------------------------------------------------------------------------------------------------------------------------------------------------------------------------------------------------------------------------------------------------------------------------------------------------------------------------------------------------------------------------------------------------------------------------------------------------------------------------|
|    |    |       |      |                                                                                                                                                                                                                                                                                                                                                                                                       |                                                                                                                                                                                                                                                                                                                                                                                                                                                                                                                                                                                                                                                                                                                                                                                                                                                                                                                                                                                                                                                                                                                                                                                                                                                                                                                                                                                                                                                                                                                                                                                                                                                                   | anatase nanoparticle (0.29); tio2 nanomaterial (0.29)                                                                                                                                                                                                                                                                                                                                                                                                                                                                                                                                                                                                                                                                                                                                                                                                                                                                                                                                                                                                                                                                                                   |
| 14 | 16 | 0.969 | 2010 | effect; accumulation; c-60 fullerenes; plant; earthworm species; multispecies conditions; underlying causes; weathered pesticides; gold nanoparticles; arabidopsis thaliana gene expression   silver nanoparticles; changes; response; silver ions; arabidopsis thaliana gene expression; surface coating; plants; extracellular nutrient-cycling enzyme activity; bacterial community; soil slurries | plant species (165.06, 1.0E-4); c-60 fullerene (164.34, 1.0E-4); cerium uptake (144.26, 1.0E-4); surface properties (144.26, 1.0E-4); raphanus sativus (144.26, 1.0E-4); citric acid (144.26, 1.0E-4); commercial ceo2 nanoparticle (144.26, 1.0E-4); zn ion exposure (143.97, 1.0E-4); developmental responses (139.64, 1.0E-4); crop plant (139.64, 1.0E-4); nutrient status (137.85, 1.0E-4); arabidopsis thaliana seedling (135.03, 1.0E-4); arabidopsis thaliana gene expression (130.43, 1.0E-4); dde bioaccumulation (128.58, 1.0E-4); glycine max (128.58, 1.0E-4); ag nanoparticle exposure (125.85, 1.0E-4); critical review (125.12, 1.0E-4); biotic factor (123.97, 1.0E-4); aquatic macrophyte (123.97, 1.0E-4); phytotoxic hazard (120.44, 1.0E-4); related gene expression (115.78, 1.0E-4); root tissue development (115.78, 1.0E-4); photosynthetic characteristics (111.13, 1.0E-4); ulmus elongata seedling (111.13, 1.0E-4); rice plant (106.49, 1.0E-4); soil-rice system (106.49, 1.0E-4); life cycle (106.49, 1.0E-4); cucurbita pepo (106.15, 1.0E-4); weathered p (104.77, 1.0E-4); multispecies condition (101.87, 1.0E-4); earthworm species (101.87, 1.0E-4); weathered pesticide (100.11, 1.0E-4); agricultural plant (94.63, 1.0E-4); nanoscale zero-valent iron (92.69, 1.0E-4); dna-chitosan complex (88.13, 1.0E-4); nanomaterials removal (88.13, 1.0E-4); plant growth (83.59, 1.0E-4); influencing arbuscular mycorrhizal fungi effect (83.59, 1.0E-4); metal nanoparticle (83.59, 1.0E-4); zno bulk (82.8, 1.0E-4); zno np (82.8, 1.0E-4); different soil (81.65, 1.0E-4); uncoated zinc oxide nanomaterial (81.65, 1.0E-4); | semi-analytical model (0.53); low-temperature wgs reaction (0.53); ni-ceo2 catalyst (0.53); bulk counterpart (0.53); plasma mass spectrometry (0.53); fullerene df-1 (0.53); rgo core-shell nanocomposite (0.53); ion release kinetics (0.53); promoter effect (0.53); respiratory deposition (0.53); biological tissue (0.53); graphene-supported ni (0.53); radiosensitive mammalian cell (0.53); nonmonotonic retention (0.53); phytoremediation system (0.53); triazine-based pollutant (0.53); combined effect (0.53); using single particle (0.53); polyvinylpyrrolidone-coated silver nanoparticle (0.53); one-step approach (0.53); nano-scale tio2 (0.53); silver sulfide nanomaterial (0.48); bacterial tactic response (0.48); amino modification (0.48); magna straus (0.48); physiochemical properties (0.48); electrochemical filter (0.48); siberian sturgeon (0.48); test media (0.48); nitrogen-fixing bacteria (0.48); potential toxicity (0.48); oxide-based nanomaterial (0.48); common aqueous antibiotic tetracycline (0.48); juvenile carp (0.48); cnt size (0.48); organic carbon (0.48); aquatic chemistry (0.48); bone marrow |

|                                                                                                                                                                                                                                                                                                                                                                                                                                                                                                                                                                                                                                                                                                                                                                                                                                                                                                                                                                                                                                                                                                                                                                                                                                                                                                                                                                                                                                                                                                                                                                                                                                                                                                                                             |                                                                                                                                                                                                                                                                                                                                                                                                                                                                                                                                                                                                                                                                                                                                                                                                                                                                                                                                                                                                                                                                                                                                                                                                                                  |
|---------------------------------------------------------------------------------------------------------------------------------------------------------------------------------------------------------------------------------------------------------------------------------------------------------------------------------------------------------------------------------------------------------------------------------------------------------------------------------------------------------------------------------------------------------------------------------------------------------------------------------------------------------------------------------------------------------------------------------------------------------------------------------------------------------------------------------------------------------------------------------------------------------------------------------------------------------------------------------------------------------------------------------------------------------------------------------------------------------------------------------------------------------------------------------------------------------------------------------------------------------------------------------------------------------------------------------------------------------------------------------------------------------------------------------------------------------------------------------------------------------------------------------------------------------------------------------------------------------------------------------------------------------------------------------------------------------------------------------------------|----------------------------------------------------------------------------------------------------------------------------------------------------------------------------------------------------------------------------------------------------------------------------------------------------------------------------------------------------------------------------------------------------------------------------------------------------------------------------------------------------------------------------------------------------------------------------------------------------------------------------------------------------------------------------------------------------------------------------------------------------------------------------------------------------------------------------------------------------------------------------------------------------------------------------------------------------------------------------------------------------------------------------------------------------------------------------------------------------------------------------------------------------------------------------------------------------------------------------------|
| <p>nutritional quality (81.65, 1.0E-4); silver ion (79.89, 1.0E-4); bean seed (79.07, 1.0E-4); greenhouse condition (77.09, 1.0E-4); comparative effect (77.09, 1.0E-4); cell death (76.54, 1.0E-4); gold nanoparticle (74.99, 1.0E-4); antioxidant defence (74.58, 1.0E-4); agricultural soil (74.58, 1.0E-4); kidney bean (72.55, 1.0E-4); uncoated zno nanomaterial (72.55, 1.0E-4); phaseolus vulgaris (72.55, 1.0E-4); underlying causes (68.05, 1.0E-4); gas exchange (68.05, 1.0E-4); acute effect (65.68, 1.0E-4); graphene oxide (65.35, 1.0E-4); metal oxide nanoparticle (65.2, 1.0E-4); cuo nanoparticle (64.48, 1.0E-4); glycosyl residue (63.56, 1.0E-4); living plant cell wall (63.56, 1.0E-4); fullerene-induced increase (63.56, 1.0E-4); engineered nanomaterial (62.9, 1.0E-4); zinc oxide nanoparticle exposure (59.87, 1.0E-4); zeamays l (59.55, 1.0E-4); sewage sludge (59.12, 1.0E-4); containing multiwalled carbon nanotube (57.02, 1.0E-4); porous media (54.38, 1.0E-4); maize shoot (53.17, 1.0E-4); daucus carota (52.56, 1.0E-4); carbon nanotube (48.82, 1.0E-4); magnetic nanoparticle (48.57, 1.0E-4); different gene expression pattern (48.13, 1.0E-4); humic acid (44.73, 1.0E-4); hordeum vulgare (44.01, 1.0E-4); yield enhancement (42.18, 1.0E-4); by-2 cell suspension culture (41.71, 1.0E-4); aquatic environment (41.3, 1.0E-4); gold nanoparticle exposure (39.49, 1.0E-4); agronomical parameter (37.48, 1.0E-4); zinc oxide nanoparticle (36.9, 1.0E-4); multi-walled carbon nanotube (35.91, 1.0E-4); foeniculum vulgare mill (35.02, 1.0E-4); natural organic matter (31.75, 1.0E-4); enhanced dissolution (30.61, 1.0E-4); inositol hexakisphosphate (30.61, 1.0E-4); bulk titanium</p> | <p>cell (0.45); colloidal sio2 (0.45); double-layer compression (0.45); illumination mode (0.45); sludge digestion (0.45); environmental effect (0.45); swiss-webster mice (0.45); size characterization (0.45); containing waste incineration residue (0.45); histopathological effect (0.45); bulk zno (0.45); titanium nitride nanotube (0.45); free-living nematode caenorhabditis elegans (0.45); polymer-stabilised nanoparticle (0.45); soil mixture (0.45); pilot wastewater treatment plant (0.45); charge neutralization (0.45); electrochemical capacitive energy storage (0.45); coaxial array (0.45); multi-angle light scattering (0.45); methyl violet (0.45); field-flow fractionation (0.45); asymmetrical flow (0.45); comparative phototoxicity (0.45); electrolyte species (0.45); commercial tio2 nanoparticle (0.45); explicit fate modelling (0.45); methodological consideration (0.42); characterization factor (0.42); seventeen subcontinental freshwater (0.42); sorption behavior (0.42); field study (0.42); natural soil system (0.42); green algae (0.42); microwave-induced carbon nanotube (0.42); agcl nanoparticle (0.42); ceriodaphnia dubia (0.42); urban soil (0.42); using different</p> |
|---------------------------------------------------------------------------------------------------------------------------------------------------------------------------------------------------------------------------------------------------------------------------------------------------------------------------------------------------------------------------------------------------------------------------------------------------------------------------------------------------------------------------------------------------------------------------------------------------------------------------------------------------------------------------------------------------------------------------------------------------------------------------------------------------------------------------------------------------------------------------------------------------------------------------------------------------------------------------------------------------------------------------------------------------------------------------------------------------------------------------------------------------------------------------------------------------------------------------------------------------------------------------------------------------------------------------------------------------------------------------------------------------------------------------------------------------------------------------------------------------------------------------------------------------------------------------------------------------------------------------------------------------------------------------------------------------------------------------------------------|----------------------------------------------------------------------------------------------------------------------------------------------------------------------------------------------------------------------------------------------------------------------------------------------------------------------------------------------------------------------------------------------------------------------------------------------------------------------------------------------------------------------------------------------------------------------------------------------------------------------------------------------------------------------------------------------------------------------------------------------------------------------------------------------------------------------------------------------------------------------------------------------------------------------------------------------------------------------------------------------------------------------------------------------------------------------------------------------------------------------------------------------------------------------------------------------------------------------------------|

|    |    |       |      |                                                                                                                                                                                                                                                                                                                                                          |                                                                                                                                                                                                                                                                                                                                                                                                                                                                                                                                                                                                                                                                                                         |                                                                                                                                                                                                                                                                                                                                                                                                                                                                                                                                                                                                                                                                                                                                               |
|----|----|-------|------|----------------------------------------------------------------------------------------------------------------------------------------------------------------------------------------------------------------------------------------------------------------------------------------------------------------------------------------------------------|---------------------------------------------------------------------------------------------------------------------------------------------------------------------------------------------------------------------------------------------------------------------------------------------------------------------------------------------------------------------------------------------------------------------------------------------------------------------------------------------------------------------------------------------------------------------------------------------------------------------------------------------------------------------------------------------------------|-----------------------------------------------------------------------------------------------------------------------------------------------------------------------------------------------------------------------------------------------------------------------------------------------------------------------------------------------------------------------------------------------------------------------------------------------------------------------------------------------------------------------------------------------------------------------------------------------------------------------------------------------------------------------------------------------------------------------------------------------|
|    |    |       |      |                                                                                                                                                                                                                                                                                                                                                          | dioxide (29.22, 1.0E-4); solution chemistry (28.9, 1.0E-4); wastewater treatment (26.62, 1.0E-4); soil type (26.26, 1.0E-4); ni nanoparticles phytotoxicity (26.26, 1.0E-4); wheat root (24.05, 1.0E-4); titanium dioxide (22.72, 1.0E-4); aqueous solution (22.72, 1.0E-4); natural water (21.58, 1.0E-4); complex interplay (18.8, 1.0E-4); multiwalled carbon nanotube (18.36, 1.0E-4); surface coating (17.85, 1.0E-4)                                                                                                                                                                                                                                                                              | reducing agent (0.42); dunaliella tertiolecta (0.42); mediating c-60 phototransformation (0.42); chlorella vulgaris (0.42); surface complexation modeling (0.42); screening evaluation (0.42); sewer system (0.42); inhibitory effect (0.42); vitro test (0.42); tetrahymena thermophila (0.42); nanoscale metal oxide (0.42); synergistic toxic effect (0.42); reduced graphene oxide material (0.42); polyaromatic hydrocarbon (0.42); direct feeding (0.42); bacterial community structure (0.42); different release scenario (0.42); anatase nanoparticle (0.41); pure anatase (0.41); wheat seedling (0.41); wavelength dependency (0.41); sativus 1 (0.41); diesel soot (0.41); part 2-toxicity (0.41); product characterization (0.41) |
| 15 | 12 | 0.945 | 2008 | zno nanoparticles; role; morphology; aggregation kinetics; fish; nanoscale metal oxides; bioavailability; root cells; autoxidation; genotoxic effects   assessment; physico-chemical behavior; using multi-dimensional parameter testing; titanium dioxide nanoparticles; aquatic environments; root cells; autoxidation; genotoxic effects; synchrotron | zinc oxide (144.13, 1.0E-4); nano-zno particle (111.77, 1.0E-4); comparative eco-toxicities (111.77, 1.0E-4); aerosol exposure mode (110.5, 1.0E-4); relevant nanomaterial (107.22, 1.0E-4); human health risk (107.22, 1.0E-4); aerosolized transition metal oxide nanoparticle (105.34, 1.0E-4); anti-microbial activities (105.34, 1.0E-4); cu-doped tio2 nanoparticle (102.2, 1.0E-4); bacterial responses (100.8, 1.0E-4); metal oxide (96.26, 1.0E-4); developmental phytotoxicity (96.26, 1.0E-4); reactive oxygen species (90.36, 1.0E-4); using allium cepa (89.91, 1.0E-4); hazardous phytotoxic nature (87.91, 1.0E-4); bacteria-nanoparticle interaction (87.11, 1.0E-4); wastewater sludge | semi-analytical model (0.16); low-temperature wgs reaction (0.16); niceo2 catalyst (0.16); bulk counterpart (0.16); plasma mass spectrometry (0.16); fullerene df-1 (0.16); rgo core-shell nanocomposite (0.16); ion release kinetics (0.16); promoter effect (0.16); respiratory deposition (0.16); biological tissue (0.16); graphene-supported ni (0.16); radiosensitive mammalian cell (0.16); nonmonotonic retention (0.16); phytoremediation system (0.16); triazine-based pollutant (0.16);                                                                                                                                                                                                                                            |

|  |  |                                                     |                                                                                                                                                                                                                                                                                                                                                                                                                                                                                                                                                                                                                                                                                                                                                                                                                                                                                                                                                                                                                                                                                                                                                                                                                                                                                                                                                                                                                                                                                                                                                                                                                                                                                                                                                     |                                                                                                                                                                                                                                                                                                                                                                                                                                                                                                                                                                                                                                                                                                                                                                                                                                                                                                                                                                                                                                                                                                                                                                                                             |
|--|--|-----------------------------------------------------|-----------------------------------------------------------------------------------------------------------------------------------------------------------------------------------------------------------------------------------------------------------------------------------------------------------------------------------------------------------------------------------------------------------------------------------------------------------------------------------------------------------------------------------------------------------------------------------------------------------------------------------------------------------------------------------------------------------------------------------------------------------------------------------------------------------------------------------------------------------------------------------------------------------------------------------------------------------------------------------------------------------------------------------------------------------------------------------------------------------------------------------------------------------------------------------------------------------------------------------------------------------------------------------------------------------------------------------------------------------------------------------------------------------------------------------------------------------------------------------------------------------------------------------------------------------------------------------------------------------------------------------------------------------------------------------------------------------------------------------------------------|-------------------------------------------------------------------------------------------------------------------------------------------------------------------------------------------------------------------------------------------------------------------------------------------------------------------------------------------------------------------------------------------------------------------------------------------------------------------------------------------------------------------------------------------------------------------------------------------------------------------------------------------------------------------------------------------------------------------------------------------------------------------------------------------------------------------------------------------------------------------------------------------------------------------------------------------------------------------------------------------------------------------------------------------------------------------------------------------------------------------------------------------------------------------------------------------------------------|
|  |  | speciation; north american water quality guidelines | (85.82, 1.0E-4); vitro cytotoxicity (83.53, 1.0E-4); using catfish (83.53, 1.0E-4); human hepg2 cell (81.61, 1.0E-4); physico-chemical behavior (77.2, 1.0E-4); facade coating (72.81, 1.0E-4); recombinant escherichia coli bacteria (70.6, 1.0E-4); toxicological assessment (70.6, 1.0E-4); root cell (64.14, 1.0E-4); allium cepa (62.1, 1.0E-4); genotoxic effect (62.1, 1.0E-4); synchrotron speciation (57.74, 1.0E-4); kaolin suspension (55.81, 1.0E-4); health effect (55.24, 1.0E-4); arabidopsis thaliana (52.22, 1.0E-4); in-vitro cell exposure studies (51.41, 1.0E-4); aerosol science (51.41, 1.0E-4); lung-a dialog (51.41, 1.0E-4); nanoparticle toxicity (47.95, 1.0E-4); numerical investigation (42.72, 1.0E-4); silver nanoparticle (42.7, 1.0E-4); inorganic nanoparticle (40.81, 1.0E-4); anisotropic porous media (40.73, 1.0E-4); nanoparticles transport (40.73, 1.0E-4); coated nickel hydroxide nanoparticle (36.35, 1.0E-4); mesquite plant (36.35, 1.0E-4); north american water quality guideline (32.03, 1.0E-4); thyroid hormone action (32.03, 1.0E-4); zno nanoparticle (32.03, 1.0E-4); particle structure (25.67, 1.0E-4); rationalizing nanomaterial size (25.67, 1.0E-4); sample preparation (25.67, 1.0E-4); atomic force microscopy (23.95, 1.0E-4); flow field-flow fractionation (23.95, 1.0E-4); dynamic light scattering (23.95, 1.0E-4); graphene oxide (22.22, 1.0E-4); phosphorus removal (21.34, 1.0E-4); metal oxide nanoparticle (19.48, 1.0E-4); biological nitrogen (19.47, 1.0E-4); porous media (18.48, 1.0E-4); humic acid (15.2, 1.0E-4); sativus l (15.03, 0.001); engineered nanomaterial (14.76, 0.001); titanium dioxide nanoparticle (14.03, 0.001); natural organic matter (13.37, | combined effect (0.16); using single particle (0.16); polyvinylpyrrolidone-coated silver nanoparticle (0.16); one-step approach (0.16); nano-scale tio2 (0.16); silver sulfide nanomaterial (0.14); bacterial tactic response (0.14); amino modification (0.14); magna straus (0.14); physiochemical properties (0.14); electrochemical filter (0.14); siberian sturgeon (0.14); test media (0.14); nitrogen-fixing bacteria (0.14); potential toxicity (0.14); oxide-based nanomaterial (0.14); common aqueous antibiotic tetracycline (0.14); juvenile carp (0.14); cnt size (0.14); organic carbon (0.14); aquatic chemistry (0.14); bone marrow cell (0.13); colloidal sio2 (0.13); double-layer compression (0.13); illumination mode (0.13); sludge digestion (0.13); environmental effect (0.13); swiss-webster mice (0.13); size characterization (0.13); containing waste incineration residue (0.13); histopathological effect (0.13); bulk zno (0.13); titanium nitride nanotube (0.13); free-living nematode caenorhabditis elegans (0.13); polymer-stabilised nanoparticle (0.13); soil mixture (0.13); pilot wastewater treatment plant (0.13); charge neutralization (0.13); electrochemical |
|--|--|-----------------------------------------------------|-----------------------------------------------------------------------------------------------------------------------------------------------------------------------------------------------------------------------------------------------------------------------------------------------------------------------------------------------------------------------------------------------------------------------------------------------------------------------------------------------------------------------------------------------------------------------------------------------------------------------------------------------------------------------------------------------------------------------------------------------------------------------------------------------------------------------------------------------------------------------------------------------------------------------------------------------------------------------------------------------------------------------------------------------------------------------------------------------------------------------------------------------------------------------------------------------------------------------------------------------------------------------------------------------------------------------------------------------------------------------------------------------------------------------------------------------------------------------------------------------------------------------------------------------------------------------------------------------------------------------------------------------------------------------------------------------------------------------------------------------------|-------------------------------------------------------------------------------------------------------------------------------------------------------------------------------------------------------------------------------------------------------------------------------------------------------------------------------------------------------------------------------------------------------------------------------------------------------------------------------------------------------------------------------------------------------------------------------------------------------------------------------------------------------------------------------------------------------------------------------------------------------------------------------------------------------------------------------------------------------------------------------------------------------------------------------------------------------------------------------------------------------------------------------------------------------------------------------------------------------------------------------------------------------------------------------------------------------------|

0.001); carbon nanotube (13, 0.001); single-walled carbon nanotube (12.37, 0.001); engineered nanoparticle (10.05, 0.005); aggregation kinetics (10.02, 0.005); solution chemistry (9.82, 0.005); zinc oxide nanoparticle (9.74, 0.005); wastewater treatment (9.05, 0.005); screening evaluation (9, 0.005); titanium dioxide (7.72, 0.01); aqueous solution (7.72, 0.01); natural water (7.33, 0.01); aquatic environment (7.26, 0.01); daphnia magna (5.84, 0.05); fullerene nanoparticle (5.68, 0.05); graphene oxide nanomaterial (5.68, 0.05); gold nanoparticle (5.4, 0.05); particle size (5.29, 0.05); surface water (4.63, 0.05); eisenia fetida (4.57, 0.05); c-60 fullerene (4.52, 0.05); multiwalled carbon nanotube (4.49, 0.05); water purification (4.3, 0.05); ceo2 nanoparticle (4.18, 0.05); environmental exposure (4.18, 0.05); silver ion (4.08, 0.05); probabilistic material flow analysis (3.91, 0.05); multi-walled carbon nanotube (3.81, 0.1); source water quality (3.69, 0.1); multiwall carbon nanotube coagulation (3.69, 0.1); zea mays l (3.63, 0.1); organic matter (3.58, 0.1); coated silver nanoparticle (3.58, 0.1); earthworm eisenia fetida (3.58, 0.1); heterotrophic wastewater biomass (3.52, 0.1); anaerobic digestion (3.47, 0.1); adverse effect (3.42, 0.1); metal ion (3.36, 0.1); plant species (3.3, 0.1); cell death (3.3, 0.1)

capacitive energy storage (0.13); coaxial array (0.13); multi-angle light scattering (0.13); methyl violet (0.13); field-flow fractionation (0.13); asymmetrical flow (0.13); comparative phototoxicity (0.13); electrolyte species (0.13); commercial tio2 nanoparticle (0.13); explicit fate modelling (0.13); screening evaluation (0.12); nanoscale metal oxide (0.12); characterization factor (0.12); seventeen subcontinental freshwater (0.12); sorption behavior (0.12); field study (0.12); natural soil system (0.12); green algae (0.12); microwave-induced carbon nanotube (0.12); agcl nanoparticle (0.12); ceriodaphnia dubia (0.12); urban soil (0.12); using different reducing agent (0.12); dunaliella tertiolecta (0.12); mediating c-60 phototransformation (0.12); chlorella vulgaris (0.12); surface complexation modeling (0.12); methodological consideration (0.12); sewer system (0.12); inhibitory effect (0.12); vitro test (0.12); tetrahymena thermophila (0.12); synergistic toxic effect (0.12); reduced graphene oxide material (0.12); polyaromatic hydrocarbon (0.12); direct feeding (0.12); bacterial community structure (0.12); different release scenario (0.12); sativus l (0.11); wavelength

|    |    |      |      |                                                                                                                                                                                                                                                                                                                                                                                     |                                                                                                                                                                                                                                                                                                                                                                                                                                                                                                                                                                                                                                                                                                                                                                                                                                                                                                                                                                                                                                                                                                                                                                                                                                                                                                                                                                                                                                                                                         |                                                                                                                                                                                                                                                                                                                                                                                                                                                                                                                                                                                                                                                                                                                                                                                                                                                                                                                                                                                                                                                       |
|----|----|------|------|-------------------------------------------------------------------------------------------------------------------------------------------------------------------------------------------------------------------------------------------------------------------------------------------------------------------------------------------------------------------------------------|-----------------------------------------------------------------------------------------------------------------------------------------------------------------------------------------------------------------------------------------------------------------------------------------------------------------------------------------------------------------------------------------------------------------------------------------------------------------------------------------------------------------------------------------------------------------------------------------------------------------------------------------------------------------------------------------------------------------------------------------------------------------------------------------------------------------------------------------------------------------------------------------------------------------------------------------------------------------------------------------------------------------------------------------------------------------------------------------------------------------------------------------------------------------------------------------------------------------------------------------------------------------------------------------------------------------------------------------------------------------------------------------------------------------------------------------------------------------------------------------|-------------------------------------------------------------------------------------------------------------------------------------------------------------------------------------------------------------------------------------------------------------------------------------------------------------------------------------------------------------------------------------------------------------------------------------------------------------------------------------------------------------------------------------------------------------------------------------------------------------------------------------------------------------------------------------------------------------------------------------------------------------------------------------------------------------------------------------------------------------------------------------------------------------------------------------------------------------------------------------------------------------------------------------------------------|
|    |    |      |      |                                                                                                                                                                                                                                                                                                                                                                                     |                                                                                                                                                                                                                                                                                                                                                                                                                                                                                                                                                                                                                                                                                                                                                                                                                                                                                                                                                                                                                                                                                                                                                                                                                                                                                                                                                                                                                                                                                         | dependency (0.11); diesel soot (0.11); part 2-toxicity (0.11); product characterization (0.11); anatase nanoparticle (0.11); tio2 nanomaterial (0.11); geochemical reactivity (0.11)                                                                                                                                                                                                                                                                                                                                                                                                                                                                                                                                                                                                                                                                                                                                                                                                                                                                  |
| 17 | 10 | 0.95 | 2010 | nanoparticles; retention; modeling; subsurface; different release scenarios; collector surface; aggregation state; affinity; experimental study; aggregated nanoparticles   effects; dissolution; ultraviolet light; silver nanoparticle mobility; functionalized gold nanoparticles; collector surface; modeling; counter ion concentration; soil microorganisms; model definition | soil column (205.24, 1.0E-4); tio2 nanoparticle sorption (146.35, 1.0E-4); natural organic matter (136.52, 1.0E-4); dissolution dynamics (134.21, 1.0E-4); select organic ligand (134.21, 1.0E-4); continental scale (131.03, 1.0E-4); functionalized gold nanoparticle (131.03, 1.0E-4); assessing environmental behavior (131.03, 1.0E-4); in-vitro nanoparticle stability testing (131.03, 1.0E-4); hydrochemical data (131.03, 1.0E-4); model definition (128.6, 1.0E-4); coagulation processes (127.96, 1.0E-4); colloidal stability (124.22, 1.0E-4); hydrochemistry influence aggregation kinetics (122.35, 1.0E-4); natural organic matter concentration (122.35, 1.0E-4); functionalized engineered nanoparticle (122.35, 1.0E-4); physicochemical properties (116.11, 1.0E-4); uncoated tio2 nanomaterial (116.11, 1.0E-4); oecd tg (116.11, 1.0E-4); tests method (116.11, 1.0E-4); counter ion concentration (107.34, 1.0E-4); titania nanoparticle stability (107.34, 1.0E-4); sand-packed column (101.07, 1.0E-4); interpreting deposition behavior (101.07, 1.0E-4); silver nanoparticle mobility (94.81, 1.0E-4); ultraviolet light (94.81, 1.0E-4); different type (92.43, 1.0E-4); quartz sand (91.73, 1.0E-4); distinguishable transport behavior (88.57, 1.0E-4); silica sand (88.57, 1.0E-4); machine learning (82.36, 1.0E-4); next generation (82.36, 1.0E-4); nanoparticle transport behavior (82.36, 1.0E-4); transport model (82.36, 1.0E-4); water treatment | nonmonotonic retention (0.23); polyvinylpyrrolidone-coated silver nanoparticle (0.23); semi-analytical model (0.23); low-temperature wgs reaction (0.23); ni-ceo2 catalyst (0.23); bulk counterpart (0.23); plasma mass spectrometry (0.23); fullerene df-1 (0.23); rgo core-shell nanocomposite (0.23); ion release kinetics (0.23); promoter effect (0.23); respiratory deposition (0.23); biological tissue (0.23); graphene-supported ni (0.23); radiosensitive mammalian cell (0.23); phytoremediation system (0.23); triazine-based pollutant (0.23); combined effect (0.23); using single particle (0.23); one-step approach (0.23); nano-scale tio2 (0.23); magna straus (0.2); physiochemical properties (0.2); test media (0.2); silver sulfide nanomaterial (0.2); bacterial tactic response (0.2); amino modification (0.2); electrochemical filter (0.2); siberian sturgeon (0.2); nitrogen-fixing bacteria (0.2); potential toxicity (0.2); oxide-based nanomaterial (0.2); common aqueous antibiotic tetracycline (0.2); juvenile carp |

|  |  |  |  |                                                                                                                                                                                                                                                                                                                                                                                                                                                                                                                                                                                                                                                                                                                                                                                                                                                                                                                                                                                                                                                                                                                                                                                                                                                                                                                                                                                                                                                                                                                                                                                                                                                                                                                          |                                                                                                                                                                                                                                                                                                                                                                                                                                                                                                                                                                                                                                                                                                                                                                                                                                                                                                                                                                                                                                                                                                                                                                                                                                            |
|--|--|--|--|--------------------------------------------------------------------------------------------------------------------------------------------------------------------------------------------------------------------------------------------------------------------------------------------------------------------------------------------------------------------------------------------------------------------------------------------------------------------------------------------------------------------------------------------------------------------------------------------------------------------------------------------------------------------------------------------------------------------------------------------------------------------------------------------------------------------------------------------------------------------------------------------------------------------------------------------------------------------------------------------------------------------------------------------------------------------------------------------------------------------------------------------------------------------------------------------------------------------------------------------------------------------------------------------------------------------------------------------------------------------------------------------------------------------------------------------------------------------------------------------------------------------------------------------------------------------------------------------------------------------------------------------------------------------------------------------------------------------------|--------------------------------------------------------------------------------------------------------------------------------------------------------------------------------------------------------------------------------------------------------------------------------------------------------------------------------------------------------------------------------------------------------------------------------------------------------------------------------------------------------------------------------------------------------------------------------------------------------------------------------------------------------------------------------------------------------------------------------------------------------------------------------------------------------------------------------------------------------------------------------------------------------------------------------------------------------------------------------------------------------------------------------------------------------------------------------------------------------------------------------------------------------------------------------------------------------------------------------------------|
|  |  |  |  | <p>(73.58, 1.0E-4); source water (70, 1.0E-4); titanium dioxide nanoparticle removal (70, 1.0E-4); surface-modified nanoparticle (64.69, 1.0E-4); environmental system (63.87, 1.0E-4); theoretical analysis (63.87, 1.0E-4); rapid settling (57.77, 1.0E-4); inorganic nanoparticle (51.97, 1.0E-4); nanoparticle core properties (48.69, 1.0E-4); macromolecule-coated nanoparticle (48.69, 1.0E-4); carbon mineralization (42.55, 1.0E-4); bacterial abundance (42.55, 1.0E-4); soil properties (42.55, 1.0E-4); natural antidote (37.3, 1.0E-4); different source (33.63, 1.0E-4); monovalent electrolyte (33.63, 1.0E-4); gold nanoparticle aggregation (33.63, 1.0E-4); natural organic matter sample (33.63, 1.0E-4); graphene oxide (31.22, 1.0E-4); engineered nanomaterial (30.04, 1.0E-4); tio2 nanoparticle (28.51, 1.0E-4); soil microorganism (27.41, 1.0E-4); functionalized single-wall carbon nanotube (27.41, 1.0E-4); carbon nanotube (27.3, 1.0E-4); silver nanoparticle (27.07, 1.0E-4); porous media (25.97, 1.0E-4); engineered nanoparticle (24.35, 1.0E-4); humic acid (21.37, 1.0E-4); collector surface (21.26, 1.0E-4); aggregated nanoparticle (21.26, 1.0E-4); aquatic environment (19.72, 1.0E-4); hematite nanoparticle (19.48, 1.0E-4); single-walled carbon nanotube (17.39, 1.0E-4); multi-walled carbon nanotube (17.16, 1.0E-4); different release scenario (15.22, 1.0E-4); titanium dioxide nanoparticle (13.8, 0.001); magna straus (13.09, 0.001); physiochemical properties (13.09, 0.001); test media (13.09, 0.001); wastewater treatment (12.72, 0.001); zinc oxide nanoparticle (12.18, 0.001); metal oxide nanoparticle (12.17, 0.001); natural water (10.95, 0.001);</p> | <p>(0.2); cnt size (0.2); organic carbon (0.2); aquatic chemistry (0.2); bone marrow cell (0.19); colloidal sio2 (0.19); double-layer compression (0.19); illumination mode (0.19); sludge digestion (0.19); environmental effect (0.19); swiss-webster mice (0.19); size characterization (0.19); containing waste incineration residue (0.19); histopathological effect (0.19); bulk zno (0.19); titanium nitride nanotube (0.19); free-living nematode caenorhabditis elegans (0.19); polymer-stabilised nanoparticle (0.19); soil mixture (0.19); pilot wastewater treatment plant (0.19); charge neutralization (0.19); electrochemical capacitive energy storage (0.19); coaxial array (0.19); multi-angle light scattering (0.19); methyl violet (0.19); field-flow fractionation (0.19); asymmetrical flow (0.19); comparative phototoxicity (0.19); electrolyte species (0.19); commercial tio2 nanoparticle (0.19); explicit fate modelling (0.19); different release scenario (0.18); characterization factor (0.18); seventeen subcontinental freshwater (0.18); sorption behavior (0.18); field study (0.18); natural soil system (0.18); green algae (0.18); microwave-induced carbon nanotube (0.18); agcl nanoparticle</p> |
|--|--|--|--|--------------------------------------------------------------------------------------------------------------------------------------------------------------------------------------------------------------------------------------------------------------------------------------------------------------------------------------------------------------------------------------------------------------------------------------------------------------------------------------------------------------------------------------------------------------------------------------------------------------------------------------------------------------------------------------------------------------------------------------------------------------------------------------------------------------------------------------------------------------------------------------------------------------------------------------------------------------------------------------------------------------------------------------------------------------------------------------------------------------------------------------------------------------------------------------------------------------------------------------------------------------------------------------------------------------------------------------------------------------------------------------------------------------------------------------------------------------------------------------------------------------------------------------------------------------------------------------------------------------------------------------------------------------------------------------------------------------------------|--------------------------------------------------------------------------------------------------------------------------------------------------------------------------------------------------------------------------------------------------------------------------------------------------------------------------------------------------------------------------------------------------------------------------------------------------------------------------------------------------------------------------------------------------------------------------------------------------------------------------------------------------------------------------------------------------------------------------------------------------------------------------------------------------------------------------------------------------------------------------------------------------------------------------------------------------------------------------------------------------------------------------------------------------------------------------------------------------------------------------------------------------------------------------------------------------------------------------------------------|

|    |   |       |      |                                                                                                                                                                                                                                                                                                   |                                                                                                                                                                                                                                                                                                                                                                                                                                                                                                                                                                                                                                                                                                                                                                                                                                                      |                                                                                                                                                                                                                                                                                                                                                                                                                                                                                                                                                                                                                                                                                                                                                                                                                                            |
|----|---|-------|------|---------------------------------------------------------------------------------------------------------------------------------------------------------------------------------------------------------------------------------------------------------------------------------------------------|------------------------------------------------------------------------------------------------------------------------------------------------------------------------------------------------------------------------------------------------------------------------------------------------------------------------------------------------------------------------------------------------------------------------------------------------------------------------------------------------------------------------------------------------------------------------------------------------------------------------------------------------------------------------------------------------------------------------------------------------------------------------------------------------------------------------------------------------------|--------------------------------------------------------------------------------------------------------------------------------------------------------------------------------------------------------------------------------------------------------------------------------------------------------------------------------------------------------------------------------------------------------------------------------------------------------------------------------------------------------------------------------------------------------------------------------------------------------------------------------------------------------------------------------------------------------------------------------------------------------------------------------------------------------------------------------------------|
|    |   |       |      |                                                                                                                                                                                                                                                                                                   | <p>titanium dioxide (10.85, 0.001); aqueous solution (10.85, 0.001); daphnia magna (8.21, 0.005); fullerene nanoparticle (7.98, 0.005); graphene oxide nanomaterial (7.98, 0.005); arabidopsis thaliana (7.74, 0.01); zno nanoparticle (7.59, 0.01); gold nanoparticle (7.59, 0.01); particle size (7.44, 0.01); aggregation kinetics (7.2, 0.01); nonmonotonic retention (6.54, 0.05); polyvinylpyrrolidone-coated silver nanoparticle (6.54, 0.05); surface water (6.51, 0.05); eisenia fetida (6.42, 0.05); c-60 fullerene (6.35, 0.05); water purification (6.04, 0.05); ceo2 nanoparticle (5.88, 0.05); environmental exposure (5.88, 0.05); silver ion (5.73, 0.05); probabilistic material flow analysis (5.49, 0.05); source water quality (5.19, 0.05); multiwall carbon nanotube coagulation (5.19, 0.05); organic matter (5.03, 0.05)</p> | <p>(0.18); ceriodaphnia dubia (0.18); urban soil (0.18); using different reducing agent (0.18); dunaliella tertiolecta (0.18); mediating c-60 phototransformation (0.18); chlorella vulgaris (0.18); surface complexation modeling (0.18); screening evaluation (0.18); methodological consideration (0.18); sewer system (0.18); inhibitory effect (0.18); vitro test (0.18); tetrahymena thermophila (0.18); nanoscale metal oxide (0.18); synergistic toxic effect (0.18); reduced graphene oxide material (0.18); polyaromatic hydrocarbon (0.18); direct feeding (0.18); bacterial community structure (0.18); collector surface (0.17); aggregated nanoparticle (0.17); wavelength dependency (0.17); sativus 1 (0.17); diesel soot (0.17); part 2-toxicity (0.17); product characterization (0.17); anatase nanoparticle (0.17)</p> |
| 18 | 8 | 0.989 | 2008 | <p>adsorption; carbon nanotubes; atrazine; natural organic matter; engineered nanomaterials; sorption; available carbon nanotube; water; metal impurities; black carbon   multi-walled carbon nanotubes; tetracycline; aqueous solution chemistry; black carbon; thermodynamics; polyaromatic</p> | <p>multi-walled carbon nanotube (121.44, 1.0E-4); aqueous solution chemistry (103.34, 1.0E-4); carbon nanotube (102.49, 1.0E-4); competitive adsorption (95.46, 1.0E-4); monoaromatic compound (88.81, 1.0E-4); pharmaceutical antibiotics (82.51, 1.0E-4); adsorbed phenanthrene (82.16, 1.0E-4); black carbon (82.16, 1.0E-4); surface-modified carbon nanotube (75.53, 1.0E-4); available carbon nanotube (68.92, 1.0E-4); synthetic organic chemical (64.09, 1.0E-4); background solution chemistry (64.09, 1.0E-4); alpha-ethinyl estradiol (57.56,</p>                                                                                                                                                                                                                                                                                         | <p>phytoremediation system (0.04); semi-analytical model (0.04); low-temperature wgs reaction (0.04); ni-ceo2 catalyst (0.04); bulk counterpart (0.04); plasma mass spectrometry (0.04); fullerene df-1 (0.04); rgo core-shell nanocomposite (0.04); ion release kinetics (0.04); promoter effect (0.04); respiratory deposition (0.04); biological tissue (0.04); graphene-supported ni (0.04); radiosensitive</p>                                                                                                                                                                                                                                                                                                                                                                                                                        |



|  |  |  |                                                                                                                                                                                                                                                                                                                                                                                                                                                                                                                                                                                                                                                                                                                                                                                                                                                                                                                                                                                                                                                                                                                                                                                                                                                                                                                                                                                                                                                                                                                                                                                                                                                                                                                                                                                                                                                                                 |                                                                                                                                                                                                                                                                                                                                                                                                                                                                                                                                                                                                                                                                                                                                                                                                                                                                                                                                                                                                                                                                                                                                                                                                            |
|--|--|--|---------------------------------------------------------------------------------------------------------------------------------------------------------------------------------------------------------------------------------------------------------------------------------------------------------------------------------------------------------------------------------------------------------------------------------------------------------------------------------------------------------------------------------------------------------------------------------------------------------------------------------------------------------------------------------------------------------------------------------------------------------------------------------------------------------------------------------------------------------------------------------------------------------------------------------------------------------------------------------------------------------------------------------------------------------------------------------------------------------------------------------------------------------------------------------------------------------------------------------------------------------------------------------------------------------------------------------------------------------------------------------------------------------------------------------------------------------------------------------------------------------------------------------------------------------------------------------------------------------------------------------------------------------------------------------------------------------------------------------------------------------------------------------------------------------------------------------------------------------------------------------|------------------------------------------------------------------------------------------------------------------------------------------------------------------------------------------------------------------------------------------------------------------------------------------------------------------------------------------------------------------------------------------------------------------------------------------------------------------------------------------------------------------------------------------------------------------------------------------------------------------------------------------------------------------------------------------------------------------------------------------------------------------------------------------------------------------------------------------------------------------------------------------------------------------------------------------------------------------------------------------------------------------------------------------------------------------------------------------------------------------------------------------------------------------------------------------------------------|
|  |  |  | <p>hydrocarbons; pharmaceutical antibiotics; multiwalled carbon nanotubes; surface-modified carbon nanotubes; agrobacterium</p> <p>1.0E-4); adsorption kinetics (57.56, 1.0E-4); multiwalled carbon nanotube (50.74, 1.0E-4); indoor corona device (44.65, 1.0E-4); ionizable aromatic compound (38.36, 1.0E-4); oxidized multiwalled carbon nanotube (38.36, 1.0E-4); other natural adsorbent (32.35, 1.0E-4); carbon nanomaterial (28.37, 1.0E-4); sorption behavior (23.52, 1.0E-4); natural soil system (23.52, 1.0E-4); polyaromatic hydrocarbon (23.52, 1.0E-4); different type (15.12, 0.001); silver nanoparticle (14.74, 0.001); phytoremediation system (9.32, 0.005); graphene oxide (7.67, 0.01); engineered nanomaterial (7.6, 0.01); porous media (6.38, 0.05); tio2 nanoparticle (6.32, 0.05); natural organic matter (6.28, 0.05); aqueous solution (5.92, 0.05); humic acid (5.25, 0.05); aquatic environment (4.84, 0.05); single-walled carbon nanotube (4.27, 0.05); fulvic acid (3.49, 0.1); engineered nanoparticle (3.47, 0.1); titanium dioxide nanoparticle (3.39, 0.1); solution chemistry (3.39, 0.1); wastewater treatment (3.12, 0.1); metal oxide nanoparticle (2.99, 0.1); zinc oxide nanoparticle (2.96, 0.1); inorganic nanoparticle (2.82, 0.1); titanium dioxide (2.67, 0.5); natural water (2.53, 0.5); daphnia magna (2.02, 0.5); graphene oxide nanomaterial (1.96, 0.5); arabidopsis thaliana (1.9, 0.5); zno nanoparticle (1.86, 0.5); gold nanoparticle (1.86, 0.5); particle size (1.83, 0.5); aggregation kinetics (1.77, 0.5); surface water (1.6, 0.5); eisenia fetida (1.58, 0.5); c-60 fullerene (1.56, 0.5); water purification (1.48, 0.5); ceo2 nanoparticle (1.44, 0.5); environmental exposure (1.44, 0.5); silver ion (1.41, 0.5); probabilistic material flow analysis (1.35, 0.5); source water quality (1.27, 0.5);</p> | <p>mammalian cell (0.04); nonmonotonic retention (0.04); triazine-based pollutant (0.04); combined effect (0.04); using single particle (0.04); polyvinylpyrrolidone-coated silver nanoparticle (0.04); one-step approach (0.04); nano-scale tio2 (0.04); silver sulfide nanomaterial (0.04); bacterial tactic response (0.04); amino modification (0.04); magna straus (0.04); physiochemical properties (0.04); electrochemical filter (0.04); siberian sturgeon (0.04); test media (0.04); nitrogen-fixing bacteria (0.04); potential toxicity (0.04); oxide-based nanomaterial (0.04); common aqueous antibiotic tetracycline (0.04); juvenile carp (0.04); cnt size (0.04); organic carbon (0.04); aquatic chemistry (0.04); bone marrow cell (0.03); colloidal sio2 (0.03); double-layer compression (0.03); illumination mode (0.03); sludge digestion (0.03); environmental effect (0.03); swiss-webster mice (0.03); size characterization (0.03); containing waste incineration residue (0.03); histopathological effect (0.03); bulk zno (0.03); titanium nitride nanotube (0.03); free-living nematode caenorhabditis elegans (0.03); polymer-stabilised nanoparticle (0.03); soil mixture</p> |
|--|--|--|---------------------------------------------------------------------------------------------------------------------------------------------------------------------------------------------------------------------------------------------------------------------------------------------------------------------------------------------------------------------------------------------------------------------------------------------------------------------------------------------------------------------------------------------------------------------------------------------------------------------------------------------------------------------------------------------------------------------------------------------------------------------------------------------------------------------------------------------------------------------------------------------------------------------------------------------------------------------------------------------------------------------------------------------------------------------------------------------------------------------------------------------------------------------------------------------------------------------------------------------------------------------------------------------------------------------------------------------------------------------------------------------------------------------------------------------------------------------------------------------------------------------------------------------------------------------------------------------------------------------------------------------------------------------------------------------------------------------------------------------------------------------------------------------------------------------------------------------------------------------------------|------------------------------------------------------------------------------------------------------------------------------------------------------------------------------------------------------------------------------------------------------------------------------------------------------------------------------------------------------------------------------------------------------------------------------------------------------------------------------------------------------------------------------------------------------------------------------------------------------------------------------------------------------------------------------------------------------------------------------------------------------------------------------------------------------------------------------------------------------------------------------------------------------------------------------------------------------------------------------------------------------------------------------------------------------------------------------------------------------------------------------------------------------------------------------------------------------------|

|  |  |  |  |                                                                                                                                                                                                                                                                                                                                                                                                                                                                                                                                                                                                                                                                                                                                                                                                                                                                                                                                                                                                                                                                                                                                                                                                                                                                                                                                      |                                                                                                                                                                                                                                                                                                                                                                                                                                                                                                                                                                                                                                                                                                                                                                                                                                                                                                                                                                                                                                                                                                                                                                                                                                                   |
|--|--|--|--|--------------------------------------------------------------------------------------------------------------------------------------------------------------------------------------------------------------------------------------------------------------------------------------------------------------------------------------------------------------------------------------------------------------------------------------------------------------------------------------------------------------------------------------------------------------------------------------------------------------------------------------------------------------------------------------------------------------------------------------------------------------------------------------------------------------------------------------------------------------------------------------------------------------------------------------------------------------------------------------------------------------------------------------------------------------------------------------------------------------------------------------------------------------------------------------------------------------------------------------------------------------------------------------------------------------------------------------|---------------------------------------------------------------------------------------------------------------------------------------------------------------------------------------------------------------------------------------------------------------------------------------------------------------------------------------------------------------------------------------------------------------------------------------------------------------------------------------------------------------------------------------------------------------------------------------------------------------------------------------------------------------------------------------------------------------------------------------------------------------------------------------------------------------------------------------------------------------------------------------------------------------------------------------------------------------------------------------------------------------------------------------------------------------------------------------------------------------------------------------------------------------------------------------------------------------------------------------------------|
|  |  |  |  | <p>multiwall carbon nanotube coagulation (1.27, 0.5); organic matter (1.23, 0.5); coated silver nanoparticle (1.23, 0.5); earthworm eisenia fetida (1.23, 0.5); heterotrophic wastewater biomass (1.21, 0.5); anaerobic digestion (1.2, 0.5); adverse effect (1.18, 0.5); metal ion (1.16, 0.5); plant species (1.14, 0.5); cell death (1.14, 0.5); nanowaste detection (1.12, 0.5); theoretical studies (1.12, 0.5); irish surface (1.1, 0.5); cuo nanoparticle (1.1, 0.5); regulatory system (1.1, 0.5); nano-scale pollutant (1.1, 0.5); drinking water (1.1, 0.5); environmental risk assessment (1.06, 0.5); facile synthesis (1.06, 0.5); copper nanoparticle (1.04, 0.5); suwannee river (1.04, 0.5); nanocopper removal (1.02, 0.5); graphene oxide nanoparticle (1.02, 0.5); comparative study (1.02, 0.5); algal toxicity (1.02, 0.5); municipal wastewater (1.02, 0.5); modeling technique (1.02, 0.5); chemical transformation (1.01, 0.5); physicochemical interaction (1.01, 0.5); silica nanoparticle (1.01, 0.5); environmental factor (1.01, 0.5); high-throughput screening (0.99, 0.5); danio rerio (0.99, 0.5); toxicity effect (0.97, 0.5); cucurbita pepo (0.97, 0.5); microbial communities (0.95, 0.5); aerosol exposure mode (0.93, 0.5); trophic transfer (0.93, 0.5); chemical speciation (0.91, 0.5)</p> | <p>(0.03); pilot wastewater treatment plant (0.03); charge neutralization (0.03); electrochemical capacitive energy storage (0.03); coaxial array (0.03); multi-angle light scattering (0.03); methyl violet (0.03); field-flow fractionation (0.03); asymmetrical flow (0.03); comparative phototoxicity (0.03); electrolyte species (0.03); commercial tio2 nanoparticle (0.03); explicit fate modelling (0.03); sorption behavior (0.03); natural soil system (0.03); polyaromatic hydrocarbon (0.03); characterization factor (0.03); seventeen subcontinental freshwater (0.03); field study (0.03); green algae (0.03); microwave-induced carbon nanotube (0.03); agcl nanoparticle (0.03); ceriodaphnia dubia (0.03); urban soil (0.03); using different reducing agent (0.03); dunaliella tertiolecta (0.03); mediating c-60 phototransformation (0.03); chlorella vulgaris (0.03); surface complexation modeling (0.03); screening evaluation (0.03); methodological consideration (0.03); sewer system (0.03); inhibitory effect (0.03); vitro test (0.03); tetrahymena thermophila (0.03); nanoscale metal oxide (0.03); synergistic toxic effect (0.03); reduced graphene oxide material (0.03); direct feeding (0.03); bacterial</p> |
|--|--|--|--|--------------------------------------------------------------------------------------------------------------------------------------------------------------------------------------------------------------------------------------------------------------------------------------------------------------------------------------------------------------------------------------------------------------------------------------------------------------------------------------------------------------------------------------------------------------------------------------------------------------------------------------------------------------------------------------------------------------------------------------------------------------------------------------------------------------------------------------------------------------------------------------------------------------------------------------------------------------------------------------------------------------------------------------------------------------------------------------------------------------------------------------------------------------------------------------------------------------------------------------------------------------------------------------------------------------------------------------|---------------------------------------------------------------------------------------------------------------------------------------------------------------------------------------------------------------------------------------------------------------------------------------------------------------------------------------------------------------------------------------------------------------------------------------------------------------------------------------------------------------------------------------------------------------------------------------------------------------------------------------------------------------------------------------------------------------------------------------------------------------------------------------------------------------------------------------------------------------------------------------------------------------------------------------------------------------------------------------------------------------------------------------------------------------------------------------------------------------------------------------------------------------------------------------------------------------------------------------------------|

|  |  |  |  |  |  |                                                                                                                                                                                                                                                                                   |
|--|--|--|--|--|--|-----------------------------------------------------------------------------------------------------------------------------------------------------------------------------------------------------------------------------------------------------------------------------------|
|  |  |  |  |  |  | community structure (0.03); different release scenario (0.03); other natural adsorbent (0.03); wavelength dependency (0.03); sativus 1 (0.03); diesel soot (0.03); part 2-toxicity (0.03); product characterization (0.03); anatase nanoparticle (0.03); tio2 nanomaterial (0.03) |
|--|--|--|--|--|--|-----------------------------------------------------------------------------------------------------------------------------------------------------------------------------------------------------------------------------------------------------------------------------------|

**Table.S2 Network summary of co-citation analysis by Citespace**

| Burst | Centrality | Sigma          | PageRank | Keyword | Author        | Year | Title | Source                  | Vol | Page | Half-life | ClusterID |
|-------|------------|----------------|----------|---------|---------------|------|-------|-------------------------|-----|------|-----------|-----------|
|       | 0.01       | 1.00           | 1.01     |         | Gottschalk F  | 2009 | ...   | ENVIRON SCI<br>TECHNOL  | 43  | 9216 | 6         | 12        |
|       | 0.00       | 1.00           | 0.60     |         | Klaine SJ     | 2008 | ...   | ENVIRON TOXICOL<br>CHEM | 27  | 1825 | 5         | 12        |
|       | 0.47       | 1.00           | 1.30     |         | Mueller NC    | 2008 | ...   | ENVIRON SCI<br>TECHNOL  | 42  | 4447 | 5         | 12        |
| 6.32  | 0.01       | 1.06           | 1.12     |         | Nowack B      | 2007 | ...   | ENVIRON POLLUT          | 150 | 5    | 5         | 0         |
| 6.37  | 0.00       | 1.00           | 0.58     |         | Nel A         | 2006 | ...   | SCIENCE                 | 311 | 622  | 5         | 6         |
| 4.99  | 0.01       | 1.04           | 1.09     |         | Keller AA     | 2010 | ...   | ENVIRON SCI<br>TECHNOL  | 44  | 1962 | 5         | 5         |
| 27.42 | 0.02       | 1.59           | 1.04     |         | Hyung H       | 2007 | ...   | ENVIRON SCI<br>TECHNOL  | 41  | 179  | 4         | 0         |
| 4.66  | 0.07       | 1.36           | 1.82     |         | Petosa AR     | 2010 | ...   | ENVIRON SCI<br>TECHNOL  | 44  | 6532 | 5         | 17        |
| 17.90 | 0.00       | 1.00           | 0.49     |         | Wiesner MR    | 2006 | ...   | ENVIRON SCI<br>TECHNOL  | 40  | 4336 | 5         | 7         |
| 4.42  | 0.03       | 1.16           | 0.98     |         | Benn TM       | 2008 | ...   | ENVIRON SCI<br>TECHNOL  | 42  | 4133 | 6         | 3         |
| 32.07 | 0.03       | 2.25           | 1.85     |         | Oberdorster G | 2005 | ...   | ENVIRON HEALTH<br>PERSP | 113 | 823  | 6         | 1         |
| 31.46 | 0.00       | 1.00           | 0.57     |         | Lowry GV      | 2012 | ...   | ENVIRON SCI<br>TECHNOL  | 46  | 6893 | 3         | 11        |
| 31.61 | 0.00       | 1.00           | 0.52     |         | Gottschalk F  | 2013 | ...   | ENVIRON POLLUT          | 181 | 287  | 3         | 3         |
| 4.77  | 0.06       | 1.32           | 2.26     |         | Pan B         | 2008 | ...   | ENVIRON SCI<br>TECHNOL  | 42  | 9005 | 5         | 18        |
|       | 0.06       | 1.00           | 1.90     |         | Kiser MA      | 2009 | ...   | ENVIRON SCI<br>TECHNOL  | 43  | 6757 | 5         | 12        |
|       | 0.08       | 1.00           | 2.29     |         | Aruoja V      | 2009 | ...   | SCI TOTAL<br>ENVIRON    | 407 | 1461 | 5         | 8         |
| 3.74  | 0.03       | 1.10           | 2.08     |         | Liu JY        | 2010 | ...   | ENVIRON SCI<br>TECHNOL  | 44  | 2169 | 4         | 3         |
|       | 0.01       | 1.00           | 1.04     |         | Mauter MS     | 2008 | ...   | ENVIRON SCI<br>TECHNOL  | 42  | 5843 | 5         | 18        |
|       | 0.31       | 1.00           | 2.18     |         | Heinlaan M    | 2008 | ...   | CHEMOSPHERE             | 71  | 1308 | 5         | 8         |
| 6.19  | 0.00       | 1.00           | 0.63     |         | Navarro E     | 2008 | ...   | ECOTOXICOLOGY           | 17  | 372  | 5         | 0         |
| 2.81  | 0.17       | 1.56           | 2.21     |         | Chen KL       | 2007 | ...   | J COLLOID INTERF<br>SCI | 309 | 126  | 5         | 5         |
| 43.93 | 0.73       | 27472009591.68 | 1.27     |         | Oberdorster E | 2004 | ...   | ENVIRON HEALTH<br>PERSP | 112 | 1058 | 5         | 4         |
| 3.85  | 0.56       | 5.51           | 2.15     |         | Kaegi R       | 2008 | ...   | ENVIRON POLLUT          | 156 | 233  | 5         | 12        |
| 7.22  | 0.22       | 4.16           | 3.55     |         | Franklin NM   | 2007 | ...   | ENVIRON SCI<br>TECHNOL  | 41  | 8484 | 5         | 15        |
|       | 0.20       | 1.00           | 3.13     |         | Kaegi R       | 2011 | ...   | ENVIRON SCI<br>TECHNOL  | 45  | 3902 | 4         | 3         |
|       | 0.01       | 1.00           | 1.07     |         | Griffitt RJ   | 2008 | ...   | ENVIRON TOXICOL<br>CHEM | 27  | 1972 | 5         | 12        |
| 8.18  | 0.02       | 1.15           | 1.55     |         | Petersen EJ   | 2011 | ...   | ENVIRON SCI<br>TECHNOL  | 45  | 9837 | 4         | 9         |
| 11.45 | 0.01       | 1.10           | 1.09     |         | Handy RD      | 2008 | ...   | ECOTOXICOLOGY           | 17  | 287  | 4         | 15        |
| 15.70 | 0.19       | 15.17          | 2.33     |         | Yang K        | 2006 | ...   | ENVIRON SCI<br>TECHNOL  | 40  | 1855 | 5         | 0         |
| 10.94 | 0.15       | 4.53           | 1.35     |         | Levard C      | 2012 | ...   | ENVIRON SCI<br>TECHNOL  | 46  | 6900 | 3         | 11        |
|       | 0.00       | 1.00           | 0.52     |         | Handy RD      | 2008 | ...   | ECOTOXICOLOGY           | 17  | 315  | 5         | 4         |
| 35.25 | 0.24       | 1972.02        | 2.48     |         | Fortner JD    | 2005 | ...   | ENVIRON SCI<br>TECHNOL  | 39  | 4307 | 4         | 6         |
|       | 0.02       | 1.00           | 1.51     |         | Navarro E     | 2008 | ...   | ENVIRON SCI<br>TECHNOL  | 42  | 8959 | 5         | 8         |
|       | 0.08       | 1.00           | 1.88     |         | French RA     | 2009 | ...   | ENVIRON SCI<br>TECHNOL  | 43  | 1354 | 6         | 5         |

|       |      |             |      |  |              |         |                         |     |       |   |    |
|-------|------|-------------|------|--|--------------|---------|-------------------------|-----|-------|---|----|
| 3.81  | 0.03 | 1.14        | 1.44 |  | Hyung H      | 2008... | ENVIRON SCI<br>TECHNOL  | 42  | 4416  | 5 | 0  |
| 9.63  | 0.02 | 1.18        | 1.49 |  | Gottschalk F | 2011... | J ENVIRON<br>MONITOR    | 13  | 1145  | 4 | 2  |
| 3.64  | 0.10 | 1.42        | 1.86 |  | Fabrega J    | 2011... | ENVIRON INT             | 37  | 517   | 4 | 11 |
| 31.53 | 0.03 | 2.22        | 1.43 |  | Sun TY       | 2014... | ENVIRON POLLUT          | 185 | 69    | 2 | 2  |
| 40.59 | 0.01 | 1.41        | 1.01 |  | Colvin VL    | 2003... | NAT BIOTECHNOL          | 21  | 1166  | 6 | 6  |
| 12.50 | 0.04 | 1.68        | 2.17 |  | Nowack B     | 2012... | ENVIRON TOXICOL<br>CHEM | 31  | 50    | 3 | 2  |
| 5.90  | 0.01 | 1.05        | 1.20 |  | Chen W       | 2007... | ENVIRON SCI<br>TECHNOL  | 41  | 8295  | 5 | 0  |
| 16.69 | 0.03 | 1.75        | 1.41 |  | Moore MN     | 2006... | ENVIRON INT             | 32  | 967   | 5 | 4  |
| 11.58 | 0.08 | 2.32        | 0.88 |  | Chen KL      | 2006... | LANGMUIR                | 22  | 10994 | 6 | 17 |
|       | 0.48 | 1.00        | 2.52 |  | Blaser SA    | 2008... | SCI TOTAL<br>ENVIRON    | 390 | 396   | 5 | 3  |
| 12.18 | 0.19 | 8.01        | 1.76 |  | Dreyer DR    | 2010... | CHEM SOC REV            | 39  | 228   | 5 | 7  |
| 27.38 | 0.87 | 26340061.88 | 2.94 |  | Lovern SB    | 2006... | ENVIRON TOXICOL<br>CHEM | 25  | 1132  | 4 | 4  |
| 9.83  | 0.01 | 1.09        | 0.99 |  | Lam CW       | 2006... | CRIT REV TOXICOL        | 36  | 189   | 5 | 1  |
| 10.55 | 0.08 | 2.33        | 0.92 |  | Weir A       | 2012... | ENVIRON SCI<br>TECHNOL  | 46  | 2242  | 3 | 12 |
| 6.24  | 0.12 | 2.07        | 1.70 |  | Lin DH       | 2007... | ENVIRON POLLUT          | 150 | 243   | 6 | 14 |
| 20.80 | 0.00 | 1.00        | 0.53 |  | Adams LK     | 2006... | WATER RES               | 40  | 3527  | 5 | 15 |
|       | 0.01 | 1.00        | 1.02 |  | Zhang Y      | 2009... | WATER RES               | 43  | 4249  | 6 | 5  |
| 23.61 | 0.52 | 19605.86    | 1.61 |  | Lecoanet HF  | 2004... | ENVIRON SCI<br>TECHNOL  | 38  | 5164  | 6 | 7  |
|       | 0.03 | 1.00        | 2.47 |  | Kim B        | 2010... | ENVIRON SCI<br>TECHNOL  | 44  | 7509  | 5 | 11 |
|       | 0.03 | 1.00        | 1.44 |  | Yang K       | 2010... | CHEM REV                | 110 | 5989  | 4 | 0  |
|       | 0.00 | 1.00        | 0.55 |  | Chen X       | 2007... | CHEM REV                | 107 | 2891  | 6 | 5  |
| 29.35 | 0.78 | 22669235.02 | 1.90 |  | Sayes CM     | 2004... | NANO LETT               | 4   | 1881  | 5 | 6  |
|       | 0.58 | 1.00        | 2.60 |  | Federici G   | 2007... | AQUAT TOXICOL           | 84  | 415   | 5 | 4  |
| 29.35 | 0.05 | 4.30        | 2.90 |  | Lam CW       | 2004... | TOXICOL SCI             | 77  | 126   | 5 | 1  |
| 9.61  | 0.00 | 1.00        | 0.56 |  | Brar SK      | 2010... | WASTE MANAGE            | 30  | 504   | 5 | 14 |
|       | 0.05 | 1.00        | 2.94 |  | Domingos RF  | 2009... | ENVIRON SCI<br>TECHNOL  | 43  | 1282  | 6 | 5  |
| 13.45 | 0.06 | 2.17        | 1.90 |  | Zhao GX      | 2011... | ENVIRON SCI<br>TECHNOL  | 45  | 10454 | 5 | 10 |
| 21.59 | 0.00 | 1.00        | 0.60 |  | Piccinno F   | 2012... | J NANOPART RES          | 14  | 0     | 5 | 12 |
| 14.62 | 0.32 | 58.21       | 1.68 |  | Chowdhury I  | 2013... | ENVIRON SCI<br>TECHNOL  | 47  | 6288  | 3 | 7  |
| 4.31  | 0.03 | 1.11        | 0.99 |  | Kahru A      | 2010... | TOXICOLOGY              | 269 | 105   | 4 | 8  |
| 6.29  | 0.03 | 1.23        | 2.43 |  | Rico CM      | 2011... | J AGR FOOD CHEM         | 59  | 3485  | 4 | 14 |
| 6.27  | 0.00 | 1.00        | 0.52 |  | Baun A       | 2008... | ECOTOXICOLOGY           | 17  | 387   | 4 | 4  |
| 5.13  | 0.04 | 1.24        | 0.89 |  | Lin DH       | 2008... | ENVIRON SCI<br>TECHNOL  | 42  | 7254  | 4 | 0  |
| 15.24 | 0.08 | 3.03        | 1.43 |  | Fabrega J    | 2009... | ENVIRON SCI<br>TECHNOL  | 43  | 7285  | 4 | 11 |
| 19.51 | 0.73 | 42390.87    | 1.31 |  | Zhu SQ       | 2006... | MAR ENVIRON RES         | 62  | 0     | 4 | 4  |
| 20.00 | 0.00 | 1.00        | 0.90 |  | Akhavan O    | 2010... | ACS NANO                | 4   | 5731  | 6 | 13 |
| 14.46 | 0.02 | 1.28        | 0.96 |  | Saleh NB     | 2008... | ENVIRON SCI<br>TECHNOL  | 42  | 7963  | 4 | 9  |
| 14.35 | 0.32 | 51.58       | 0.84 |  | Chen KL      | 2008... | ENVIRON SCI<br>TECHNOL  | 42  | 7607  | 5 | 7  |
| 19.04 | 0.00 | 1.00        | 0.52 |  | Keller AA    | 2013... | J NANOPART RES          | 15  | 0     | 3 | 2  |
| 3.26  | 0.93 | 8.52        | 2.22 |  | Jia G        | 2005... | ENVIRON SCI<br>TECHNOL  | 39  | 1378  | 5 | 1  |
| 9.82  | 0.00 | 1.00        | 0.54 |  | Poland CA    | 2008... | NAT<br>NANOTECHNOL      | 3   | 423   | 4 | 1  |
| 18.40 | 0.00 | 1.00        | 0.59 |  | De V         | 2013... | SCIENCE                 | 339 | 535   | 3 | 9  |
| 5.84  | 0.00 | 1.00        | 0.57 |  | Baun A       | 2008... | AQUAT TOXICOL           | 86  | 379   | 6 | 4  |
| 16.34 | 0.00 | 1.00        | 0.51 |  | Maynard AD   | 2006... | NATURE                  | 444 | 267   | 4 | 7  |

|       |      |        |      |                     |         |                         |     |      |   |    |
|-------|------|--------|------|---------------------|---------|-------------------------|-----|------|---|----|
| 17.45 | 0.01 | 1.16   | 1.02 | Marcano DC          | 2010... | ACS NANO                | 4   | 4806 | 6 | 7  |
| 9.28  | 0.02 | 1.17   | 1.59 | Menard A            | 2011... | ENVIRON POLLUT          | 159 | 677  | 4 | 8  |
| 14.38 | 0.01 | 1.13   | 1.11 | Choi O              | 2008... | ENVIRON SCI<br>TECHNOL  | 42  | 4583 | 4 | 11 |
| 11.94 | 0.08 | 2.38   | 1.41 | Robichaud CO        | 2009... | ENVIRON SCI<br>TECHNOL  | 43  | 4227 | 6 | 12 |
| 9.83  | 0.02 | 1.18   | 0.99 | Xia T               | 2008... | ACS NANO                | 2   | 2121 | 4 | 15 |
| 15.98 | 0.00 | 1.00   | 0.55 | Gao J               | 2009... | ENVIRON SCI<br>TECHNOL  | 43  | 3322 | 3 | 11 |
| 10.53 | 0.15 | 4.25   | 1.83 | Geim AK             | 2007... | NAT MATER               | 6   | 183  | 7 | 10 |
| 3.49  | 0.04 | 1.16   | 2.64 | Petersen EJ         | 2009... | ENVIRON SCI<br>TECHNOL  | 43  | 2969 | 4 | 9  |
| 13.85 | 0.14 | 6.08   | 1.34 | Lin DH              | 2008... | ENVIRON SCI<br>TECHNOL  | 42  | 5580 | 4 | 15 |
| 15.49 | 0.07 | 2.75   | 1.78 | Roberts AP          | 2007... | ENVIRON SCI<br>TECHNOL  | 41  | 3025 | 3 | 9  |
| 19.53 | 0.03 | 1.64   | 1.43 | Lyon DY             | 2006... | ENVIRON SCI<br>TECHNOL  | 40  | 4360 | 3 | 6  |
| 16.49 | 0.00 | 1.00   | 0.53 | Kaegi R             | 2013... | WATER RES               | 47  | 3866 | 3 | 3  |
| 16.17 | 0.01 | 1.15   | 0.99 | Oberdorster E       | 2006... | CARBON                  | 44  | 1112 | 5 | 4  |
| 16.17 | 0.00 | 1.00   | 0.53 | Smith CJ            | 2007... | AQUAT TOXICOL           | 82  | 94   | 3 | 9  |
|       | 0.03 | 1.00   | 0.90 | Zhao J              | 2014... | ENVIRON SCI<br>TECHNOL  | 48  | 9995 | 3 | 13 |
| 16.97 | 0.01 | 1.16   | 0.99 | Lovern SB           | 2007... | ENVIRON SCI<br>TECHNOL  | 41  | 4465 | 4 | 4  |
| 19.79 | 0.03 | 1.64   | 0.77 | Peng XJ             | 2003... | CHEM PHYS LETT          | 376 | 154  | 6 | 0  |
| 16.47 | 0.08 | 3.74   | 1.24 | von der K           | 2012... | ENVIRON TOXICOL<br>CHEM | 31  | 32   | 2 | 2  |
| 10.19 | 0.01 | 1.09   | 1.10 | Huynh KA            | 2011... | ENVIRON SCI<br>TECHNOL  | 45  | 5564 | 4 | 17 |
| 11.38 | 0.02 | 1.21   | 1.56 | Limbach LK          | 2008... | ENVIRON SCI<br>TECHNOL  | 42  | 5828 | 4 | 12 |
|       | 0.00 | 1.00   | 0.15 | Vance ME            | 2015... | BEILSTEIN J<br>NANOTECH | 6   | 1769 | 2 | 34 |
| 11.84 | 0.00 | 1.00   | 0.51 | Wiesner MR          | 2009... | ENVIRON SCI<br>TECHNOL  | 43  | 6458 | 3 | 3  |
| 7.18  | 0.00 | 1.00   | 0.52 | Henry TB            | 2007... | ENVIRON HEALTH<br>PERSP | 115 | 1059 | 4 | 6  |
| 13.94 | 0.00 | 1.00   | 0.53 | Ma HB               | 2013... | ENVIRON POLLUT          | 172 | 76   | 3 | 15 |
| 13.94 | 0.00 | 1.00   | 0.57 | Lowry GV            | 2012... | ENVIRON SCI<br>TECHNOL  | 46  | 7027 | 4 | 11 |
| 13.94 | 0.00 | 1.00   | 0.57 | Ma R                | 2014... | ENVIRON SCI<br>TECHNOL  | 48  | 104  | 2 | 11 |
| 8.20  | 0.03 | 1.23   | 0.93 | Jaisi DP            | 2009... | ENVIRON SCI<br>TECHNOL  | 43  | 9161 | 4 | 7  |
| 14.40 | 0.00 | 1.00   | 0.56 | Peralta-vidua<br>JR | 2011... | J HAZARD MATER          | 186 | 1    | 3 | 14 |
| 14.40 | 0.01 | 1.13   | 1.02 | Stankovich S        | 2007... | CARBON                  | 45  | 1558 | 7 | 7  |
| 12.35 | 0.03 | 1.37   | 1.53 | Morones JR          | 2005... | NANOTECHNOLOGY          | 16  | 2346 | 7 | 11 |
| 13.14 | 0.00 | 1.00   | 0.54 | Geim AK             | 2009... | SCIENCE                 | 324 | 1530 | 6 | 10 |
| 9.86  | 0.00 | 1.00   | 0.62 | El BAM              | 2010... | ENVIRON SCI<br>TECHNOL  | 44  | 1260 | 4 | 17 |
| 12.67 | 0.03 | 1.53   | 1.40 | Liu HH              | 2014... | ENVIRON SCI<br>TECHNOL  | 48  | 3281 | 2 | 2  |
| 23.62 | 0.07 | 4.73   | 3.02 | Deguchi S           | 2001... | LANGMUIR                | 17  | 6013 | 7 | 6  |
| 4.30  | 0.12 | 1.66   | 2.28 | Li D                | 2008... | NAT<br>NANOTECHNOL      | 3   | 101  | 6 | 10 |
|       | 0.04 | 1.00   | 1.41 | Ma XM               | 2010... | SCI TOTAL<br>ENVIRON    | 408 | 3053 | 6 | 14 |
| 22.81 | 0.28 | 259.27 | 2.48 | Long RQ             | 2001... | J AM CHEM SOC           | 123 | 2058 | 7 | 0  |
| 10.67 | 0.38 | 31.38  | 1.69 | Lecoanet HF         | 2004... | ENVIRON SCI<br>TECHNOL  | 38  | 4377 | 6 | 7  |

|       |      |       |      |   |                         |          |                         |     |       |   |    |
|-------|------|-------|------|---|-------------------------|----------|-------------------------|-----|-------|---|----|
| 19.93 | 0.14 | 14.11 | 1.22 |   | Brant J                 | 2005 ... | ENVIRON SCI<br>TECHNOL  | 39  | 6343  | 4 | 6  |
|       | 0.01 | 1.00  | 1.06 |   | Keller AA               | 2014 ... | ENVIRON SCI TECH<br>LET | 1   | 65    | 3 | 2  |
|       | 0.00 | 1.00  | 0.53 |   | Zhu XS                  | 2010 ... | CHEMOSPHERE             | 78  | 209   | 4 | 8  |
| 13.03 | 0.03 | 1.54  | 0.88 |   | Kang S                  | 2008 ... | LANGMUIR                | 24  | 6409  | 6 | 1  |
| 5.66  | 0.00 | 1.00  | 0.15 |   | Nel AE                  | 2009 ... | NAT MATER               | 8   | 543   | 5 | 31 |
| 13.32 | 0.00 | 1.00  | 0.57 | 5 | Auffan M                | 2009 ... | NAT<br>NANOTECHNOL      | 4   | 634   | 4 | 5  |
| 8.87  | 0.00 | 1.00  | 0.60 |   | Zhang Y                 | 2008 ... | WATER RES               | 42  | 2204  | 4 | 5  |
| 8.46  | 0.03 | 1.24  | 1.47 |   | Kang S                  | 2007 ... | LANGMUIR                | 23  | 8670  | 6 | 1  |
| 11.85 | 0.01 | 1.11  | 1.07 |   | Westerhoff P            | 2011 ... | J ENVIRON<br>MONITOR    | 13  | 1195  | 4 | 12 |
| 14.97 | 0.35 | 93.00 | 2.21 |   | Hund-rinke K            | 2006 ... | ENVIRON SCI<br>POLLUT R | 13  | 225   | 5 | 8  |
| 13.07 | 0.02 | 1.25  | 1.42 |   | Cho HH                  | 2008 ... | ENVIRON SCI<br>TECHNOL  | 42  | 2899  | 3 | 0  |
|       | 0.00 | 1.00  | 0.53 |   | Pan B                   | 2008 ... | ENVIRON SCI<br>TECHNOL  | 42  | 5480  | 6 | 18 |
| 12.96 | 0.03 | 1.54  | 1.23 |   | Li YS                   | 2008 ... | ENVIRON SCI<br>TECHNOL  | 42  | 7174  | 5 | 7  |
| 11.00 | 0.01 | 1.10  | 1.04 |   | Rao GP                  | 2007 ... | SEP PURIF TECHNOL       | 58  | 224   | 5 | 0  |
|       | 0.02 | 1.00  | 1.30 |   | Liu SB                  | 2011 ... | ACS NANO                | 5   | 6971  | 6 | 13 |
|       | 0.00 | 1.00  | 0.62 |   | Xiu ZM                  | 2012 ... | NANO LETT               | 12  | 4271  | 4 | 11 |
| 16.76 | 0.00 | 1.00  | 0.51 |   | Aitken RJ               | 2006 ... | OCCUP MED-<br>OXFORD    | 56  | 300   | 5 | 4  |
|       | 0.00 | 1.00  | 1.12 |   | Gupta VK                | 2013 ... | ADV COLLOID<br>INTERFAC | 193 | 24    | 3 | 16 |
| 7.72  | 0.03 | 1.21  | 1.28 |   | Klaine SJ               | 2012 ... | ENVIRON TOXICOL<br>CHEM | 31  | 3     | 2 | 2  |
|       | 0.01 | 1.00  | 1.01 |   | Keller AA               | 2013 ... | J NANOPART RES          | 15  | 1     | 2 | 3  |
| 16.30 | 0.00 | 1.00  | 0.56 |   | Saleh NB                | 2010 ... | ENVIRON SCI<br>TECHNOL  | 44  | 2412  | 2 | 0  |
| 13.81 | 0.21 | 14.19 | 2.61 |   | Shvedova AA             | 2003 ... | J TOXICOL ENV<br>HEAL A | 66  | 1909  | 7 | 1  |
|       | 0.00 | 1.00  | 0.56 |   | Gardea-<br>torresdey JL | 2014 ... | ENVIRON SCI<br>TECHNOL  | 48  | 2526  | 3 | 14 |
|       | 0.00 | 1.00  | 0.61 |   | Bian SW                 | 2011 ... | LANGMUIR                | 27  | 6059  | 6 | 5  |
| 13.35 | 0.00 | 1.00  | 0.53 |   | Wang HH                 | 2009 ... | ENVIRON POLLUT          | 157 | 1171  | 2 | 15 |
|       | 0.08 | 1.00  | 1.41 |   | Gao Y                   | 2012 ... | J COLLOID INTERF<br>SCI | 368 | 540   | 4 | 10 |
|       | 0.00 | 1.00  | 0.52 |   | Ju-nam Y                | 2008 ... | SCI TOTAL<br>ENVIRON    | 400 | 396   | 5 | 12 |
| 11.11 | 0.01 | 1.10  | 1.07 |   | Xie B                   | 2008 ... | ENVIRON SCI<br>TECHNOL  | 42  | 2853  | 2 | 6  |
|       | 0.00 | 1.00  | 1.12 |   | Saleh TA                | 2012 ... | J COLLOID INTERF<br>SCI | 371 | 101   | 4 | 16 |
|       | 0.00 | 1.00  | 0.60 |   | Lanphere JD             | 2013 ... | ENVIRON SCI<br>TECHNOL  | 47  | 4255  | 4 | 13 |
|       | 0.00 | 1.00  | 0.58 |   | Zhu XS                  | 2008 ... | J ENVIRON SCI<br>HEAL A | 43  | 278   | 7 | 4  |
| 7.35  | 0.00 | 1.00  | 0.57 |   | Yang K                  | 2009 ... | LANGMUIR                | 25  | 3571  | 3 | 5  |
| 14.86 | 0.01 | 1.14  | 1.11 |   | Jaisi DP                | 2008 ... | ENVIRON SCI<br>TECHNOL  | 42  | 8317  | 5 | 7  |
| 6.98  | 0.00 | 1.00  | 0.55 |   | Jiang JK                | 2009 ... | J NANOPART RES          | 11  | 77    | 2 | 5  |
| 13.62 | 0.19 | 10.54 | 2.09 |   | Praetorius A            | 2012 ... | ENVIRON SCI<br>TECHNOL  | 46  | 6705  | 3 | 2  |
|       | 0.00 | 1.00  | 0.52 |   | Farre M                 | 2009 ... | ANAL BIOANAL<br>CHEM    | 393 | 81    | 4 | 8  |
| 14.17 | 0.00 | 1.00  | 0.57 |   | Hendren CO              | 2011 ... | ENVIRON SCI<br>TECHNOL  | 45  | 2562  | 3 | 2  |
|       | 0.12 | 1.00  | 2.17 |   | Wu L                    | 2013 ... | LANGMUIR                | 29  | 15174 | 4 | 13 |

|       |      |       |      |                  |          |                         |     |       |   |    |
|-------|------|-------|------|------------------|----------|-------------------------|-----|-------|---|----|
|       | 0.00 | 1.00  | 0.57 | Thio BJR         | 2011 ... | J HAZARD MATER          | 189 | 556   | 6 | 5  |
| 15.65 | 0.00 | 1.00  | 0.50 | Sayes CM         | 2005 ... | BIOMATERIALS            | 26  | 7587  | 4 | 6  |
|       | 0.02 | 1.00  | 1.52 | Wang XL          | 2009 ... | ENVIRON SCI<br>TECHNOL  | 43  | 6214  | 4 | 18 |
| 15.13 | 0.01 | 1.14  | 1.01 | Brant JA         | 2006 ... | LANGMUIR                | 22  | 3878  | 3 | 6  |
| 12.74 | 0.00 | 1.00  | 0.59 | Levard C         | 2011 ... | ENVIRON SCI<br>TECHNOL  | 45  | 5260  | 5 | 3  |
|       | 0.01 | 1.00  | 1.03 | Levard C         | 2013 ... | ENVIRON SCI<br>TECHNOL  | 47  | 13440 | 3 | 3  |
|       | 0.02 | 1.00  | 1.04 | Ren XM           | 2011 ... | CHEM ENG J              | 170 | 395   | 6 | 0  |
| 12.30 | 0.02 | 1.23  | 1.47 | Quik JTK         | 2014 ... | WATER RES               | 48  | 269   | 1 | 2  |
|       | 0.05 | 1.00  | 1.39 | Geranio L        | 2009 ... | ENVIRON SCI<br>TECHNOL  | 43  | 8113  | 7 | 3  |
| 13.78 | 0.23 | 16.82 | 0.82 | Lyon DY          | 2005 ... | ENVIRON TOXICOL<br>CHEM | 24  | 2757  | 3 | 6  |
| 13.64 | 0.00 | 1.00  | 0.50 | Warheit DB       | 2004 ... | TOXICOL SCI             | 77  | 117   | 5 | 1  |
|       | 0.00 | 1.00  | 0.52 | Chen D           | 2012 ... | CHEM REV                | 112 | 6027  | 4 | 13 |
|       | 0.00 | 1.00  | 1.54 | Gupta VK         | 2012 ... | RSC ADV                 | 2   | 6380  | 4 | 16 |
| 12.04 | 0.02 | 1.23  | 1.02 | Canesi L         | 2012 ... | MAR ENVIRON RES         | 76  | 16    | 3 | 4  |
|       | 0.23 | 1.00  | 2.16 | Meesters JAJ     | 2014 ... | ENVIRON SCI<br>TECHNOL  | 48  | 5726  | 1 | 3  |
| 13.27 | 0.00 | 1.00  | 0.82 | Li YH            | 2003 ... | CARBON                  | 41  | 1057  | 6 | 0  |
| 12.09 | 0.04 | 1.65  | 0.89 | Wang XL          | 2008 ... | ENVIRON SCI<br>TECHNOL  | 42  | 3207  | 2 | 0  |
| 6.48  | 0.15 | 2.46  | 1.68 | Kennedy AJ       | 2008 ... | ENVIRON TOXICOL<br>CHEM | 27  | 1932  | 3 | 9  |
|       | 0.00 | 1.00  | 0.52 | Kaegi R          | 2010 ... | ENVIRON POLLUT          | 158 | 2900  | 5 | 12 |
|       | 0.00 | 1.00  | 0.53 | Petersen EJ      | 2009 ... | ENVIRON SCI<br>TECHNOL  | 43  | 4181  | 8 | 18 |
|       | 0.00 | 1.00  | 0.55 | Marambio-jones C | 2010 ... | J NANOPART RES          | 12  | 1531  | 6 | 11 |
|       | 0.02 | 1.00  | 1.03 | Chandra V        | 2010 ... | ACS NANO                | 4   | 3979  | 7 | 10 |
| 12.76 | 0.04 | 1.70  | 1.89 | Li YH            | 2002 ... | CHEM PHYS LETT          | 357 | 263   | 7 | 0  |
|       | 0.00 | 1.00  | 0.58 | Lin DH           | 2010 ... | J ENVIRON QUAL          | 39  | 1896  | 5 | 5  |
|       | 0.00 | 1.00  | 0.55 | Ji LL            | 2009 ... | ENVIRON SCI<br>TECHNOL  | 43  | 2322  | 7 | 10 |
| 11.50 | 0.07 | 2.21  | 1.29 | Lin SJ           | 2009 ... | SMALL                   | 5   | 1128  | 3 | 14 |
| 10.54 | 0.00 | 1.00  | 0.54 | Zhu YW           | 2010 ... | ADV MATER               | 22  | 3906  | 5 | 10 |
| 8.63  | 0.00 | 1.00  | 0.61 | Ferry JL         | 2009 ... | NAT<br>NANOTECHNOL      | 4   | 441   | 3 | 2  |
| 10.54 | 0.00 | 1.00  | 0.59 | Wang YF          | 2012 ... | J HAZARD MATER          | 201 | 16    | 3 | 12 |
|       | 0.00 | 1.00  | 0.51 | Boxall ABA       | 2007 ... | CURRENT FUTURE<br>PREDI | 0   | 0     | 8 | 3  |
| 11.12 | 0.00 | 1.00  | 0.54 | Novoselov KS     | 2004 ... | SCIENCE                 | 306 | 666   | 8 | 10 |
| 9.30  | 0.04 | 1.47  | 1.88 | Lin DH           | 2008 ... | ENVIRON SCI<br>TECHNOL  | 42  | 5917  | 4 | 9  |
| 8.74  | 0.02 | 1.16  | 1.01 | Stoller MD       | 2008 ... | NANO LETT               | 8   | 3498  | 5 | 10 |
|       | 0.00 | 1.00  | 0.15 | Batley GE        | 2013 ... | ACCOUNTS CHEM<br>RES    | 46  | 854   | 4 | 48 |
| 11.02 | 0.01 | 1.10  | 1.08 | Smith B          | 2009 ... | LANGMUIR                | 25  | 9767  | 3 | 9  |
|       | 0.03 | 1.00  | 1.51 | Lopez-moreno ML  | 2010 ... | ENVIRON SCI<br>TECHNOL  | 44  | 7315  | 7 | 14 |
|       | 0.00 | 1.00  | 0.57 | Colman BP        | 2013 ... | PLOS ONE                | 8   | 0     | 4 | 11 |
|       | 0.00 | 1.00  | 0.59 | Bondarenko O     | 2013 ... | ARCH TOXICOL            | 87  | 1181  | 4 | 8  |
|       | 0.00 | 1.00  | 0.55 | Tejamaya M       | 2012 ... | ENVIRON SCI<br>TECHNOL  | 46  | 7011  | 5 | 11 |
| 7.55  | 0.00 | 1.00  | 0.57 | Li QL            | 2008 ... | WATER RES               | 42  | 4591  | 4 | 1  |
|       | 0.00 | 1.00  | 0.55 | Scown TM         | 2010 ... | CRIT REV TOXICOL        | 40  | 653   | 7 | 4  |
|       | 0.00 | 1.00  | 0.58 | Cheng XK         | 2004 ... | J CHEM ENG DATA         | 49  | 675   | 4 | 6  |
|       | 0.01 | 1.00  | 1.08 | Kang S           | 2009 ... | ENVIRON SCI<br>TECHNOL  | 43  | 2648  | 1 | 1  |
| 9.91  | 0.00 | 1.00  | 0.59 | Wijnhoven        | 2009 ... | NANOTOXICOLOGY          | 3   | 109   | 5 | 3  |



|       |      |       |      | SWP                |          |                         |     |      |   |    |  |  |
|-------|------|-------|------|--------------------|----------|-------------------------|-----|------|---|----|--|--|
| 10.15 | 0.05 | 1.65  | 1.45 | Sondi I            | 2004 ... | J COLLOID INTERF<br>SCI | 275 | 177  | 8 | 11 |  |  |
|       | 0.10 | 1.00  | 1.41 | Chen KL            | 2006 ... | ENVIRON SCI<br>TECHNOL  | 40  | 1516 | 8 | 5  |  |  |
|       | 0.00 | 1.00  | 0.55 | Yang K             | 2007 ... | ENVIRON POLLUT          | 145 | 529  | 3 | 0  |  |  |
| 9.30  | 0.01 | 1.08  | 1.03 | Brunner TJ         | 2006 ... | ENVIRON SCI<br>TECHNOL  | 40  | 4374 | 5 | 15 |  |  |
|       | 0.00 | 1.00  | 0.58 | Gottschalk F       | 2013 ... | ENVIRON TOXICOL<br>CHEM | 32  | 1278 | 2 | 12 |  |  |
|       | 0.01 | 1.00  | 1.08 | Pal S              | 2007 ... | APPL ENVIRON<br>MICROB  | 73  | 1712 | 5 | 11 |  |  |
| 7.68  | 0.00 | 1.00  | 0.54 | Muller J           | 2005 ... | TOXICOL APPL<br>PHARM   | 207 | 221  | 7 | 1  |  |  |
|       | 0.02 | 1.00  | 1.56 | Jin ZX             | 2015 ... | ENVIRON SCI<br>TECHNOL  | 49  | 9168 | 2 | 10 |  |  |
| 7.68  | 0.37 | 11.01 | 1.57 | Espinasse B        | 2007 ... | ENVIRON SCI<br>TECHNOL  | 41  | 7396 | 5 | 7  |  |  |
| 7.27  | 0.01 | 1.06  | 1.06 | Guzman KAD         | 2006 ... | ENVIRON SCI<br>TECHNOL  | 40  | 7688 | 6 | 5  |  |  |
|       | 0.00 | 1.00  | 0.59 | Sun YB             | 2015 ... | ENVIRON SCI<br>TECHNOL  | 49  | 4255 | 2 | 10 |  |  |
| 10.15 | 0.00 | 1.00  | 0.52 | Jafvert CT         | 2008 ... | ENVIRON SCI<br>TECHNOL  | 42  | 5945 | 1 | 6  |  |  |
| 10.15 | 0.00 | 1.00  | 0.45 | Lu CY              | 2006 ... | CHEM ENG SCI            | 61  | 1138 | 3 | 0  |  |  |
| 8.77  | 0.00 | 1.00  | 0.15 | Serp P             | 2003 ... | APPL CATAL A-GEN        | 253 | 337  | 8 | 25 |  |  |
| 7.90  | 0.00 | 1.00  | 0.15 | Tuzen M            | 2008 ... | J HAZARD MATER          | 152 | 632  | 3 | 28 |  |  |
| 10.21 | 0.00 | 1.00  | 1.00 | Derfus AM          | 2004 ... | NANO LETT               | 4   | 11   | 4 | 22 |  |  |
|       | 0.05 | 1.00  | 1.29 | Stampoulis D       | 2009 ... | ENVIRON SCI<br>TECHNOL  | 43  | 9473 | 4 | 14 |  |  |
|       | 0.00 | 1.00  | 0.51 | Brant J            | 2005 ... | J NANOPART RES          | 7   | 545  | 3 | 7  |  |  |
| 8.26  | 0.31 | 9.29  | 0.90 | Velzeboer I        | 2008 ... | ENVIRON TOXICOL<br>CHEM | 27  | 1942 | 3 | 8  |  |  |
|       | 0.00 | 1.00  | 0.15 | Maurer-jones<br>MA | 2013 ... | ANAL CHEM               | 85  | 3036 | 4 | 36 |  |  |
| 9.02  | 0.02 | 1.16  | 0.96 | Duncan LK          | 2008 ... | ENVIRON SCI<br>TECHNOL  | 42  | 173  | 2 | 6  |  |  |
| 8.26  | 0.01 | 1.07  | 0.93 | Pulskamp K         | 2007 ... | TOXICOL LETT            | 168 | 58   | 4 | 1  |  |  |
|       | 0.00 | 1.00  | 0.15 | Fu FL              | 2011 ... | J ENVIRON<br>MANAGE     | 92  | 407  | 6 | 49 |  |  |
|       | 0.00 | 1.00  | 0.58 | Dale AL            | 2015 ... | ENVIRON SCI<br>TECHNOL  | 49  | 2587 | 2 | 3  |  |  |
|       | 0.00 | 1.00  | 0.58 | Hu XG              | 2013 ... | CHEM REV                | 113 | 3815 | 4 | 13 |  |  |
|       | 0.00 | 1.00  | 0.60 | Liu L              | 2013 ... | CHEM ENG J              | 229 | 444  | 4 | 13 |  |  |
|       | 0.00 | 1.00  | 1.06 | Gupta VK           | 2011 ... | J HAZARD MATER          | 185 | 17   | 5 | 16 |  |  |
|       | 0.00 | 1.00  | 0.52 | Zhang XZ           | 2007 ... | CHEMOSPHERE             | 67  | 160  | 8 | 4  |  |  |
|       | 0.00 | 1.00  | 0.55 | Gondikas AP        | 2014 ... | ENVIRON SCI<br>TECHNOL  | 48  | 5415 | 1 | 12 |  |  |
|       | 0.00 | 1.00  | 0.59 | Wang J             | 2014 ... | ENVIRON SCI<br>TECHNOL  | 48  | 4817 | 3 | 10 |  |  |
|       | 0.01 | 1.00  | 1.06 | Holden PA          | 2016 ... | ENVIRON SCI<br>TECHNOL  | 50  | 6124 | 1 | 2  |  |  |
|       | 0.01 | 1.00  | 1.10 | Dimkpa CO          | 2012 ... | J NANOPART RES          | 14  | 0    | 5 | 14 |  |  |
| 5.75  | 0.00 | 1.00  | 0.54 | Xia T              | 2006 ... | NANO LETT               | 6   | 1794 | 5 | 1  |  |  |
|       | 0.00 | 1.00  | 0.62 | Fang J             | 2009 ... | ENVIRON POLLUT          | 157 | 1101 | 6 | 17 |  |  |
|       | 0.01 | 1.00  | 1.12 | Matranga V         | 2012 ... | MAR ENVIRON RES         | 76  | 32   | 3 | 4  |  |  |
|       | 0.00 | 1.00  | 0.56 | Miralles P         | 2012 ... | ENVIRON SCI<br>TECHNOL  | 46  | 9224 | 4 | 14 |  |  |
|       | 0.02 | 1.00  | 1.57 | Feriancikova L     | 2012 ... | J HAZARD MATER          | 235 | 194  | 5 | 13 |  |  |
|       | 0.01 | 1.00  | 1.04 | Hartmann NB        | 2010 ... | TOXICOLOGY              | 269 | 190  | 6 | 8  |  |  |
|       | 0.00 | 1.00  | 0.90 | Tu YS              | 2013 ... | NAT<br>NANOTECHNOL      | 8   | 594  | 4 | 13 |  |  |

|  |      |      |      |  |              |          |                       |     |       |   |    |
|--|------|------|------|--|--------------|----------|-----------------------|-----|-------|---|----|
|  | 0.00 | 1.00 | 1.00 |  | Xu PA        | 2012 ... | SCI TOTAL ENVIRON     | 424 | 1     | 5 | 23 |
|  | 0.06 | 1.00 | 1.79 |  | Zhao J       | 2015 ... | ENVIRON SCI TECHNOL   | 49  | 2849  | 2 | 13 |
|  | 0.00 | 1.00 | 0.77 |  | Duan XG      | 2015 ... | ACS CATAL             | 5   | 553   | 2 | 21 |
|  | 0.01 | 1.00 | 1.04 |  | Hotze EM     | 2010 ... | J ENVIRON QUAL        | 39  | 1909  | 4 | 17 |
|  | 0.00 | 1.00 | 0.52 |  | Handy RD     | 2012 ... | ENVIRON TOXICOL CHEM  | 31  | 15    | 2 | 2  |
|  | 0.00 | 1.00 | 0.53 |  | Lombi E      | 2013 ... | ENVIRON POLLUT        | 176 | 193   | 2 | 3  |
|  | 0.00 | 1.00 | 0.52 |  | Dhawan A     | 2006 ... | ENVIRON SCI TECHNOL   | 40  | 7394  | 2 | 6  |
|  | 0.00 | 1.00 | 0.54 |  | Apul OG      | 2013 ... | WATER RES             | 47  | 1648  | 2 | 10 |
|  | 0.00 | 1.00 | 0.62 |  | Gupta VK     | 2013 ... | ENVIRON SCI POLLUT R  | 20  | 2828  | 3 | 16 |
|  | 0.01 | 1.00 | 1.10 |  | Chowdhury I  | 2011 ... | J COLLOID INTERF SCI  | 360 | 548   | 4 | 17 |
|  | 0.00 | 1.00 | 0.62 |  | Saleh TA     | 2011 ... | APPL CATAL B- ENVIRON | 106 | 46    | 5 | 16 |
|  | 0.00 | 1.00 | 0.83 |  | Wang YG      | 2008 ... | ENVIRON SCI TECHNOL   | 42  | 3588  | 4 | 7  |
|  | 0.02 | 1.00 | 1.01 |  | Chen GX      | 2012 ... | ENVIRON SCI TECHNOL   | 46  | 7142  | 3 | 17 |
|  | 0.00 | 1.00 | 0.62 |  | Saleh TA     | 2015 ... | ENVIRON SCI POLLUT R  | 22  | 16721 | 1 | 16 |
|  | 0.00 | 1.00 | 0.62 |  | Baker TJ     | 2014 ... | ENVIRON POLLUT        | 186 | 257   | 1 | 4  |
|  | 0.00 | 1.00 | 0.57 |  | Quik JTK     | 2012 ... | ENVIRON TOXICOL CHEM  | 31  | 1019  | 3 | 2  |
|  | 0.00 | 1.00 | 0.53 |  | Lombi E      | 2012 ... | ENVIRON SCI TECHNOL   | 46  | 9089  | 3 | 3  |
|  | 0.00 | 1.00 | 0.15 |  | Ge YG        | 2011 ... | ENVIRON SCI TECHNOL   | 45  | 1659  | 4 | 53 |
|  | 0.01 | 1.00 | 1.07 |  | Mitrano DM   | 2015 ... | ENVIRON INT           | 77  | 132   | 2 | 2  |
|  | 0.00 | 1.00 | 0.53 |  | Hasselov M   | 2008 ... | ECOTOXICOLOGY         | 17  | 344   | 4 | 8  |
|  | 0.00 | 1.00 | 0.15 |  | Wagner S     | 2014 ... | ANGEW CHEM INT EDIT   | 53  | 12398 | 3 | 30 |
|  | 0.00 | 1.00 | 0.62 |  | Simon P      | 2008 ... | NAT MATER             | 7   | 845   | 3 | 10 |
|  | 0.00 | 1.00 | 0.58 |  | Thill A      | 2006 ... | ENVIRON SCI TECHNOL   | 40  | 6151  | 4 | 11 |
|  | 0.00 | 1.00 | 0.56 |  | Sun TY       | 2016 ... | ENVIRON SCI TECHNOL   | 50  | 4701  | 1 | 2  |
|  | 0.01 | 1.00 | 1.04 |  | Blinova I    | 2010 ... | ENVIRON POLLUT        | 158 | 41    | 7 | 8  |
|  | 0.00 | 1.00 | 0.55 |  | Chappell MA  | 2009 ... | ENVIRON POLLUT        | 157 | 1081  | 3 | 9  |
|  | 0.01 | 1.00 | 1.12 |  | Li J         | 2012 ... | ACS APPL MATER INTER  | 4   | 4991  | 5 | 10 |
|  | 0.00 | 1.00 | 0.53 |  | Whitley AR   | 2013 ... | ENVIRON POLLUT        | 182 | 141   | 4 | 3  |
|  | 0.00 | 1.00 | 0.61 |  | Chen KL      | 2010 ... | ENVIRON CHEM          | 7   | 10    | 2 | 9  |
|  | 0.00 | 1.00 | 0.55 |  | Dimkpa CO    | 2013 ... | ENVIRON SCI TECHNOL   | 47  | 1082  | 4 | 14 |
|  | 0.00 | 1.00 | 1.00 |  | Zhang H      | 2010 ... | ACS NANO              | 4   | 380   | 3 | 24 |
|  | 0.00 | 1.00 | 0.59 |  | Levard C     | 2013 ... | ENVIRON SCI TECHNOL   | 47  | 5738  | 3 | 3  |
|  | 0.01 | 1.00 | 1.01 |  | Praetorius A | 2014 ... | ENVIRON-SCI NANO      | 1   | 317   | 3 | 3  |
|  | 0.00 | 1.00 | 1.65 |  | Gupta VK     | 2011 ... | WATER RES             | 45  | 2207  | 5 | 16 |
|  | 0.00 | 1.00 | 1.00 |  | Gong JL      | 2009 ... | J HAZARD MATER        | 164 | 1517  | 8 | 23 |
|  | 0.00 | 1.00 | 0.60 |  | Froggett SJ  | 2014 ... | PART FIBRE TOXICOL    | 11  | 0     | 3 | 2  |
|  | 0.00 | 1.00 | 0.15 |  | Asharani PV  | 2009 ... | ACS NANO              | 3   | 279   | 8 | 41 |
|  | 0.00 | 1.00 | 0.60 |  | Garner KL    | 2014 ... | J NANOPART RES        | 16  | 0     | 3 | 2  |
|  | 0.00 | 1.00 | 0.77 |  | Sun HQ       | 2012 ... | ACS APPL MATER INTER  | 4   | 5466  | 5 | 21 |
|  | 0.00 | 1.00 | 0.59 |  | Petersen EJ  | 2011 ... | ENVIRON SCI TECHNOL   | 45  | 1133  | 5 | 9  |

|      |      |      |      |  |               |          |                          |     |       |   |    |
|------|------|------|------|--|---------------|----------|--------------------------|-----|-------|---|----|
|      | 0.00 | 1.00 | 0.61 |  | Kim JS        | 2007 ... | NANOMED-NANOTECHNOL      | 3   | 95    | 5 | 11 |
|      | 0.00 | 1.00 | 0.52 |  | Buffet PE     | 2011 ... | CHEMOSPHERE              | 84  | 166   | 3 | 8  |
| 6.05 | 0.00 | 1.00 | 0.57 |  | Limbach LK    | 2005 ... | ENVIRON SCI<br>TECHNOL   | 39  | 9370  | 5 | 5  |
|      | 0.00 | 1.00 | 0.58 |  | Priester JH   | 2012 ... | P NATL ACAD SCI<br>USA   | 109 | 0     | 5 | 14 |
|      | 0.00 | 1.00 | 0.15 |  | Perreault F   | 2015 ... | CHEM SOC REV             | 44  | 5861  | 2 | 50 |
|      | 0.00 | 1.00 | 0.62 |  | Gupta VK      | 2012 ... | MAT SCI ENG C-<br>MATER  | 32  | 12    | 4 | 16 |
|      | 0.00 | 1.00 | 0.62 |  | Du WC         | 2011 ... | J ENVIRON<br>MONITOR     | 13  | 822   | 6 | 14 |
|      | 0.00 | 1.00 | 0.15 |  | Qu XL         | 2013 ... | WATER RES                | 47  | 3931  | 4 | 51 |
|      | 0.01 | 1.00 | 1.01 |  | Seabra AB     | 2014 ... | CHEM RES TOXICOL         | 27  | 159   | 3 | 13 |
| 6.12 | 0.03 | 1.16 | 0.77 |  | Lu CS         | 2005 ... | WATER RES                | 39  | 1183  | 5 | 0  |
|      | 0.00 | 1.00 | 0.63 |  | Yao YJ        | 2012 ... | CHEM ENG J               | 184 | 326   | 5 | 10 |
|      | 0.00 | 1.00 | 0.15 |  | Li D          | 2008 ... | ENVIRON TOXICOL<br>CHEM  | 27  | 1888  | 4 | 26 |
|      | 0.00 | 1.00 | 0.15 |  | Woan K        | 2009 ... | ADV MATER                | 21  | 2233  | 7 | 27 |
|      | 0.00 | 1.00 | 0.59 |  | Long ZF       | 2012 ... | ENVIRON SCI<br>TECHNOL   | 46  | 8458  | 4 | 18 |
|      | 0.02 | 1.00 | 1.02 |  | Liu XY        | 2009 ... | ENVIRON SCI<br>TECHNOL   | 43  | 8153  | 4 | 7  |
|      | 0.00 | 1.00 | 0.15 |  | Adeleye AS    | 2014 ... | ENVIRON SCI<br>TECHNOL   | 48  | 12561 | 2 | 29 |
|      | 0.00 | 1.00 | 0.58 |  | Hu M          | 2013 ... | ENVIRON SCI<br>TECHNOL   | 47  | 3715  | 3 | 7  |
|      | 0.00 | 1.00 | 0.15 |  | Foo KY        | 2010 ... | CHEM ENG J               | 156 | 2     | 6 | 33 |
|      | 0.00 | 1.00 | 0.91 |  | Petersen EJ   | 2008 ... | ENVIRON SCI<br>TECHNOL   | 42  | 3090  | 3 | 9  |
|      | 0.00 | 1.00 | 0.51 |  | Zheng L       | 2005 ... | BIOL TRACE ELEM<br>RES   | 104 | 83    | 8 | 14 |
|      | 0.00 | 1.00 | 1.46 |  | Sun HQ        | 2014 ... | APPL CATAL B-<br>ENVIRON | 154 | 134   | 3 | 21 |
|      | 0.00 | 1.00 | 0.60 |  | Handy RD      | 2012 ... | ECOTOXICOLOGY            | 21  | 933   | 4 | 8  |
|      | 0.00 | 1.00 | 0.53 |  | Zhou DX       | 2012 ... | ENVIRON SCI<br>TECHNOL   | 46  | 7520  | 5 | 13 |
|      | 0.00 | 1.00 | 0.15 |  | Keller AA     | 2013 ... | ENVIRON SCI TECH<br>LET  | 1   | 65    | 4 | 37 |
|      | 0.00 | 1.00 | 0.58 |  | Stankovich S  | 2006 ... | NATURE                   | 442 | 282   | 7 | 7  |
|      | 0.00 | 1.00 | 0.62 |  | Wang P        | 2008 ... | SMALL                    | 4   | 2166  | 4 | 7  |
|      | 0.00 | 1.00 | 0.59 |  | Zou YD        | 2016 ... | ENVIRON SCI<br>TECHNOL   | 50  | 3658  | 1 | 13 |
|      | 0.00 | 1.00 | 0.57 |  | Kohler AR     | 2008 ... | J CLEAN PROD             | 16  | 927   | 5 | 1  |
|      | 0.00 | 1.00 | 0.57 |  | Peijnenburg W | 2015 ... | CRIT REV ENV SCI<br>TEC  | 45  | 2084  | 1 | 2  |
|      | 0.00 | 1.00 | 0.58 |  | Hischier R    | 2012 ... | SCI TOTAL<br>ENVIRON     | 425 | 271   | 5 | 3  |
|      | 0.00 | 1.00 | 0.56 |  | Zhang SJ      | 2010 ... | WATER RES                | 44  | 2067  | 6 | 0  |
|      | 0.00 | 1.00 | 0.15 |  | Gong KP       | 2009 ... | SCIENCE                  | 323 | 760   | 5 | 42 |
|      | 0.00 | 1.00 | 0.59 |  | Kiser MA      | 2010 ... | WATER RES                | 44  | 4105  | 2 | 12 |
|      | 0.00 | 1.00 | 0.15 |  | Park S        | 2009 ... | NAT<br>NANOTECHNOL       | 4   | 217   | 8 | 44 |
|      | 0.00 | 1.00 | 0.15 |  | Leary R       | 2011 ... | CARBON                   | 49  | 741   | 3 | 45 |
| 5.61 | 0.00 | 1.00 | 0.45 |  | Quan X        | 2005 ... | ENVIRON SCI<br>TECHNOL   | 39  | 3770  | 5 | 19 |
|      | 0.00 | 1.00 | 0.15 |  | Kuhlbusch TAJ | 2011 ... | PART FIBRE<br>TOXICOL    | 8   | 0     | 5 | 46 |
|      | 0.00 | 1.00 | 0.62 |  | Domingos RF   | 2009 ... | ENVIRON SCI<br>TECHNOL   | 43  | 7277  | 3 | 15 |
|      | 0.00 | 1.00 | 0.51 |  | Yi P          | 2011 ... | LANGMUIR                 | 27  | 3588  | 6 | 7  |
|      | 0.00 | 1.00 | 0.52 |  | Guo XK        | 2013 ... | ENVIRON SCI              | 47  | 12524 | 4 | 9  |

|  |      |      |      |  |                        |          |                         |      |       |   |    |
|--|------|------|------|--|------------------------|----------|-------------------------|------|-------|---|----|
|  |      |      |      |  |                        |          | TECHNOL                 |      |       |   |    |
|  | 0.00 | 1.00 | 0.54 |  | Wang ZY                | 2011 ... | ENVIRON SCI<br>TECHNOL  | 45   | 6032  | 5 | 8  |
|  | 0.00 | 1.00 | 0.55 |  | Tong ZH                | 2007 ... | ENVIRON SCI<br>TECHNOL  | 41   | 2985  | 1 | 6  |
|  | 0.00 | 1.00 | 0.54 |  | Phenrat T              | 2007 ... | ENVIRON SCI<br>TECHNOL  | 41   | 284   | 3 | 5  |
|  | 0.01 | 1.00 | 1.12 |  | Yu JG                  | 2014 ... | SCI TOTAL<br>ENVIRON    | 482  | 241   | 2 | 0  |
|  | 0.01 | 1.00 | 1.03 |  | Ren XM                 | 2014 ... | ENVIRON SCI<br>TECHNOL  | 48   | 5493  | 3 | 13 |
|  | 0.00 | 1.00 | 1.04 |  | Saleh TA               | 2014 ... | ADV COLLOID<br>INTERFAC | 211  | 93    | 2 | 16 |
|  | 0.00 | 1.00 | 0.58 |  | Yin LY                 | 2011 ... | ENVIRON SCI<br>TECHNOL  | 45   | 2360  | 2 | 8  |
|  | 0.00 | 1.00 | 0.57 |  | Zhu XS                 | 2009 ... | J NANOPART RES          | 11   | 67    | 2 | 4  |
|  | 0.00 | 1.00 | 0.55 |  | Sun YB                 | 2012 ... | ENVIRON SCI<br>TECHNOL  | 46   | 6020  | 4 | 10 |
|  | 0.06 | 1.00 | 0.97 |  | Choi O                 | 2008 ... | WATER RES               | 42   | 3066  | 4 | 11 |
|  | 0.00 | 1.00 | 0.63 |  | Upadhyayula<br>VKK     | 2009 ... | SCI TOTAL<br>ENVIRON    | 408  | 1     | 7 | 0  |
|  | 0.00 | 1.00 | 0.54 |  | Benn T                 | 2010 ... | J ENVIRON QUAL          | 39   | 1875  | 6 | 3  |
|  | 0.00 | 1.00 | 0.60 |  | Schwab F               | 2016 ... | NANOTOXICOLOGY          | 10   | 257   | 1 | 2  |
|  | 0.03 | 1.00 | 0.96 |  | Chowdhury I            | 2015 ... | ENVIRON SCI<br>TECHNOL  | 49   | 10886 | 2 | 13 |
|  | 0.00 | 1.00 | 0.59 |  | Lin DH                 | 2012 ... | WATER RES               | 46   | 4477  | 4 | 8  |
|  | 0.00 | 1.00 | 0.61 |  | Mashayekhi H           | 2012 ... | J COLLOID INTERF<br>SCI | 374  | 111   | 2 | 6  |
|  | 0.00 | 1.00 | 1.00 |  | Hardman R              | 2006 ... | ENVIRON HEALTH<br>PERSP | 114  | 165   | 2 | 22 |
|  | 0.00 | 1.00 | 0.60 |  | Sharma VK              | 2009 ... | J ENVIRON SCI<br>HEAL A | 44   | 1485  | 5 | 8  |
|  | 0.00 | 1.00 | 0.59 |  | Arvidsson R            | 2011 ... | HUM ECOL RISK<br>ASSESS | 17   | 245   | 3 | 17 |
|  | 0.00 | 1.00 | 0.15 |  | Yu WW                  | 2003 ... | CHEM MATER              | 15   | 2854  | 7 | 38 |
|  | 0.02 | 1.00 | 1.01 |  | Lin SH                 | 2012 ... | LANGMUIR                | 28   | 4178  | 2 | 17 |
|  | 0.00 | 1.00 | 0.59 |  | Kittler S              | 2010 ... | CHEM MATER              | 22   | 4548  | 4 | 3  |
|  | 0.00 | 1.00 | 0.57 |  | Aschberger K           | 2011 ... | ENVIRON INT             | 37   | 1143  | 3 | 2  |
|  | 0.00 | 1.00 | 0.53 |  | Lee CW                 | 2010 ... | ENVIRON TOXICOL<br>CHEM | 29   | 669   | 4 | 15 |
|  | 0.02 | 1.00 | 0.97 |  | Tourinho PS            | 2012 ... | ENVIRON TOXICOL<br>CHEM | 31   | 1679  | 2 | 2  |
|  | 0.01 | 1.00 | 1.08 |  | Cornelis G             | 2011 ... | ENVIRON SCI<br>TECHNOL  | 45   | 2777  | 3 | 2  |
|  | 0.00 | 1.00 | 0.50 |  | Shvedova AA            | 2005 ... | AM J PHYSIOL-<br>LUNG C | 289  | 0     | 6 | 1  |
|  | 0.00 | 1.00 | 1.00 |  | Xiang QJ               | 2012 ... | CHEM SOC REV            | 41   | 782   | 1 | 24 |
|  | 0.00 | 1.00 | 0.52 |  | Tervonen K             | 2010 ... | ENVIRON TOXICOL<br>CHEM | 29   | 1072  | 3 | 9  |
|  | 0.00 | 1.00 | 0.15 |  | Tiede K                | 2009 ... | J CHROMATOGR A          | 1216 | 503   | 2 | 32 |
|  | 0.00 | 1.00 | 0.47 |  | Donaldson K            | 2006 ... | TOXICOL SCI             | 92   | 5     | 4 | 1  |
|  | 0.00 | 1.00 | 0.59 |  | Limbach LK             | 2007 ... | ENVIRON SCI<br>TECHNOL  | 41   | 4158  | 4 | 15 |
|  | 0.00 | 1.00 | 0.61 |  | Scott-<br>fordsmand JJ | 2008 ... | ECOTOX ENVIRON<br>SAFE  | 71   | 616   | 3 | 4  |
|  | 0.00 | 1.00 | 0.52 |  | Ferguson PL            | 2008 ... | ENVIRON SCI<br>TECHNOL  | 42   | 3879  | 5 | 9  |
|  | 0.00 | 1.00 | 0.53 |  | Templeton RC           | 2006 ... | ENVIRON SCI<br>TECHNOL  | 40   | 7387  | 2 | 9  |
|  | 0.00 | 1.00 | 0.54 |  | Gurr JR                | 2005 ... | TOXICOLOGY              | 213  | 66    | 6 | 1  |
|  | 0.00 | 1.00 | 0.53 |  | Miao AJ                | 2010 ... | ENVIRON TOXICOL<br>CHEM | 29   | 2814  | 3 | 15 |

|  |      |      |      |  |                     |          |                         |     |      |   |    |
|--|------|------|------|--|---------------------|----------|-------------------------|-----|------|---|----|
|  | 0.00 | 1.00 | 0.50 |  | Maynard AD          | 2004 ... | J TOXICOL ENV<br>HEAL A | 67  | 87   | 4 | 1  |
|  | 0.03 | 1.00 | 0.88 |  | Barrena R           | 2009 ... | CHEMOSPHERE             | 75  | 850  | 4 | 14 |
|  | 0.00 | 1.00 | 0.55 |  | Oberdorster G       | 2007 ... | NANOTOXICOLOGY          | 1   | 2    | 4 | 1  |
|  | 0.00 | 1.00 | 0.47 |  | Fortner JD          | 2007 ... | ENVIRON SCI<br>TECHNOL  | 41  | 7497 | 2 | 6  |
|  | 0.00 | 1.00 | 0.91 |  | Petersen EJ         | 2008 ... | ENVIRON HEALTH<br>PERSP | 116 | 496  | 3 | 9  |
|  | 0.00 | 1.00 | 0.58 |  | Yang K              | 2006 ... | ENVIRON SCI<br>TECHNOL  | 40  | 5804 | 7 | 18 |
|  | 0.02 | 1.00 | 0.98 |  | Handy RD            | 2008 ... | ECOTOXICOLOGY           | 17  | 396  | 3 | 4  |
|  | 0.00 | 1.00 | 0.49 |  | Chen W              | 2008 ... | ENVIRON SCI<br>TECHNOL  | 42  | 6862 | 5 | 0  |
|  | 0.01 | 1.00 | 1.01 |  | Zhu XS              | 2009 ... | NANOTECHNOLOGY          | 20  | 0    | 2 | 4  |
|  | 0.01 | 1.00 | 1.10 |  | Hall PJ             | 2010 ... | ENERG ENVIRON<br>SCI    | 3   | 1238 | 1 | 10 |
|  | 0.00 | 1.00 | 0.15 |  | Kasemets K          | 2009 ... | TOXICOL IN VITRO        | 23  | 1116 | 2 | 54 |
|  | 0.01 | 1.00 | 1.09 |  | Usenko CY           | 2008 ... | TOXICOL APPL<br>PHARM   | 229 | 44   | 3 | 4  |
|  | 0.00 | 1.00 | 0.51 |  | Kashiwada S         | 2006 ... | ENVIRON HEALTH<br>PERSP | 114 | 1697 | 2 | 4  |
|  | 0.01 | 1.00 | 1.07 |  | Lee J               | 2007 ... | ENVIRON SCI<br>TECHNOL  | 41  | 2529 | 2 | 6  |
|  | 0.00 | 1.00 | 0.55 |  | Wang XK             | 2005 ... | ENVIRON SCI<br>TECHNOL  | 39  | 2856 | 4 | 0  |
|  | 0.01 | 1.00 | 1.02 |  | Hou WC              | 2009 ... | ENVIRON SCI<br>TECHNOL  | 43  | 362  | 1 | 5  |
|  | 0.00 | 1.00 | 0.15 |  | Schwarzenbach<br>RP | 2003 ... | ENV ORGANIC<br>CHEM     | 0   | 0    | 6 | 39 |
|  | 0.00 | 1.00 | 0.15 |  | Gong D              | 2001 ... | J MATER RES             | 16  | 3331 | 8 | 40 |
|  | 0.00 | 1.00 | 0.58 |  | Hussain SM          | 2005 ... | TOXICOL IN VITRO        | 19  | 975  | 5 | 8  |
|  | 0.00 | 1.00 | 0.58 |  | Li QL               | 2009 ... | ENVIRON SCI<br>TECHNOL  | 43  | 3574 | 1 | 5  |
|  | 0.00 | 1.00 | 0.15 |  | Tasis D             | 2006 ... | CHEM REV                | 106 | 1105 | 4 | 43 |
|  | 0.12 | 1.00 | 1.85 |  | Saleh N             | 2008 ... | ENVIRON SCI<br>TECHNOL  | 42  | 3349 | 2 | 5  |
|  | 0.00 | 1.00 | 0.50 |  | Shvedova AA         | 2008 ... | AM J PHYSIOL-<br>LUNG C | 295 | 0    | 2 | 1  |
|  | 0.00 | 1.00 | 0.15 |  | Griffitt RJ         | 2007 ... | ENVIRON SCI<br>TECHNOL  | 41  | 8178 | 2 | 47 |
|  | 0.00 | 1.00 | 0.53 |  | Chen KL             | 2009 ... | ENVIRON SCI<br>TECHNOL  | 43  | 7270 | 1 | 5  |
|  | 0.00 | 1.00 | 0.15 |  | Lewinski N          | 2008 ... | SMALL                   | 4   | 26   | 2 | 52 |
|  | 0.00 | 1.00 | 0.60 |  | Hotze EM            | 2008 ... | ENVIRON SCI<br>TECHNOL  | 42  | 4175 | 1 | 6  |
|  | 0.00 | 1.00 | 0.61 |  | Kang S              | 2008 ... | ENVIRON SCI<br>TECHNOL  | 42  | 7528 | 2 | 1  |
|  | 0.00 | 1.00 | 0.15 |  | Asahi R             | 2001 ... | SCIENCE                 | 293 | 269  | 8 | 55 |
|  | 0.00 | 1.00 | 0.15 |  | Baughman RH         | 2002 ... | SCIENCE                 | 297 | 787  | 8 | 35 |
|  | 0.00 | 1.00 | 0.55 |  | Helland A           | 2007 ... | ENVIRON HEALTH<br>PERSP | 115 | 1125 | 3 | 9  |
|  | 0.02 | 1.00 | 1.39 |  | Takagi A            | 2008 ... | J TOXICOL SCI           | 33  | 105  | 2 | 1  |
|  | 0.00 | 1.00 | 0.58 |  | Chen JY             | 2008 ... | ENVIRON SCI<br>TECHNOL  | 42  | 7225 | 2 | 18 |
|  | 0.00 | 1.00 | 0.54 |  | Johnson RL          | 2009 ... | ENVIRON SCI<br>TECHNOL  | 43  | 5455 | 1 | 5  |
|  | 0.00 | 1.00 | 0.59 |  | Chen CL             | 2006 ... | IND ENG CHEM RES        | 45  | 9144 | 4 | 0  |
|  | 0.02 | 1.00 | 0.92 |  | Li YH               | 2003 ... | CARBON                  | 41  | 2787 | 7 | 0  |
|  | 0.00 | 1.00 | 1.42 |  | Fujishima A         | 2000 ... | J PHOTOCH<br>PHOTOBIO C | 1   | 1    | 7 | 19 |
|  | 0.16 | 1.00 | 1.43 |  | Cui DX              | 2005 ... | TOXICOL LETT            | 155 | 73   | 1 | 1  |
|  | 0.00 | 1.00 | 0.77 |  | Kasuga T            | 1999 ... | ADV MATER               | 11  | 1307 | 8 | 20 |

|  |      |      |      |               |          |                       |     |      |   |    |
|--|------|------|------|---------------|----------|-----------------------|-----|------|---|----|
|  | 0.00 | 1.00 | 1.04 | Ju XS         | 2002 ... | J MEMBRANE SCI        | 202 | 63   | 5 | 19 |
|  | 0.00 | 1.00 | 1.46 | Chen Q        | 2002 ... | ADV MATER             | 14  | 1208 | 5 | 20 |
|  | 0.00 | 1.00 | 0.82 | Li YH         | 2003 ... | MATER RES BULL        | 38  | 469  | 4 | 0  |
|  | 0.00 | 1.00 | 0.54 | Oberdorster G | 2005 ... | PART FIBRE<br>TOXICOL | 2   | 8    | 2 | 1  |
|  | 0.00 | 1.00 | 0.77 | Tsai CC       | 2004 ... | CHEM MATER            | 16  | 4352 | 3 | 20 |
|  | 0.00 | 1.00 | 1.04 | Zhang HZ      | 2001 ... | NANO LETT             | 1   | 81   | 6 | 19 |
|  | 0.00 | 1.00 | 1.04 | Cao YA        | 2004 ... | NEW J CHEM            | 28  | 218  | 3 | 19 |
